# Supplementary material for: Desmin Knock-Out Cardiomyopathy: A Heart on the Verge of Metabolic Crisis
Source: MDPI journal article supplement (doi:10.3390/ijms231912020), 2022-10-10

### **Supplementary Figure S1.**

Bubble plot illustration of the “Gene Ontology (GO) term Cellular compartment (CC)” and “Kyoto Encyclopedia of Genes and Genomes (KEGG) pathway” enrichments derived from hierarchical clustering of all quantitated proteins; see also Figure 6A and Table S1.

Terms and pathways were sorted alphabetically, dot sizes indicate fold enrichment values, color gradient corresponds to corrected p-values (Benjamini-Hochberg), and highest fold enrichment scores were sorted by rank (Rank Fold Enrichment).

Cluster 1 GO Term CC

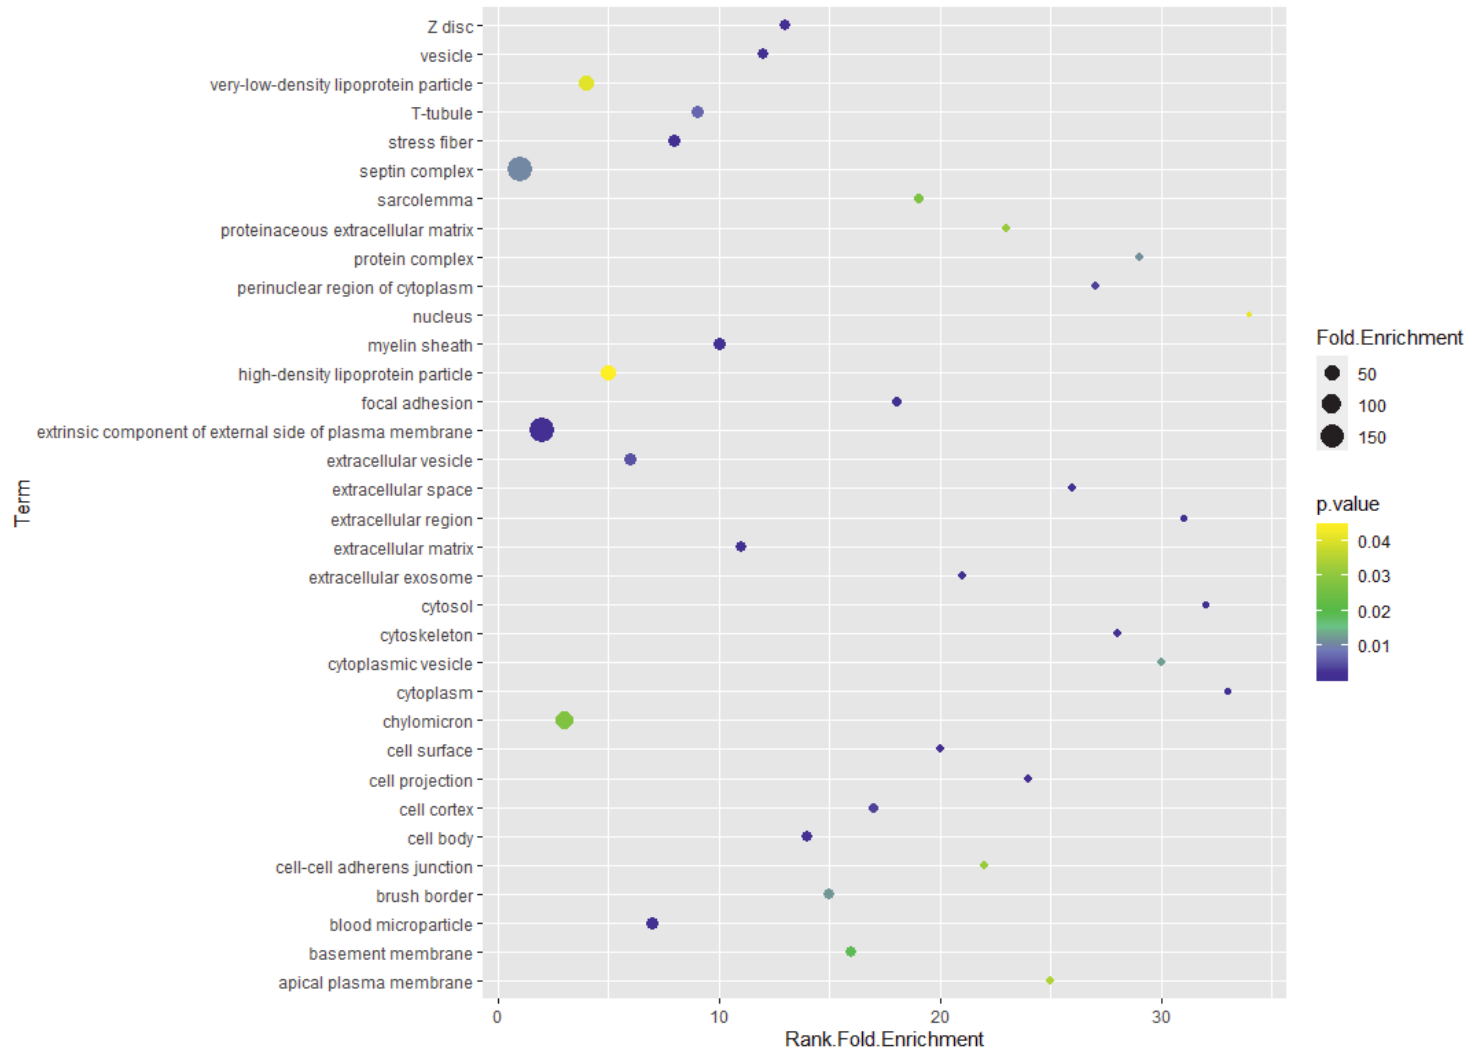

Cluster 1 KEGG Pathway

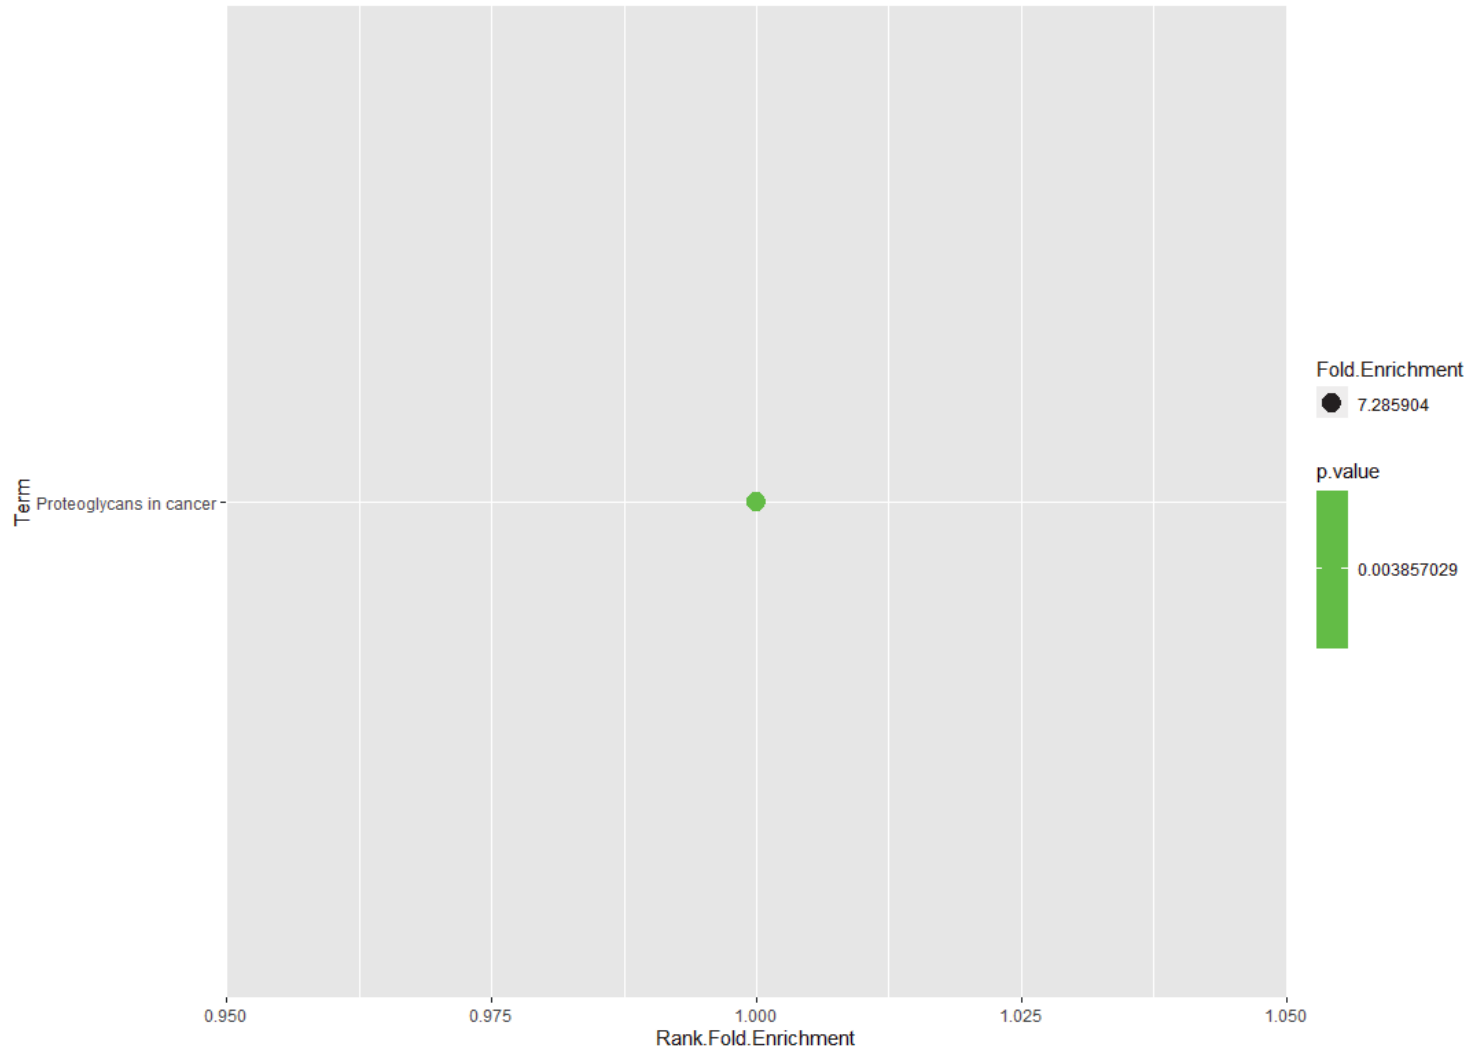

Cluster 2 GO Term CC

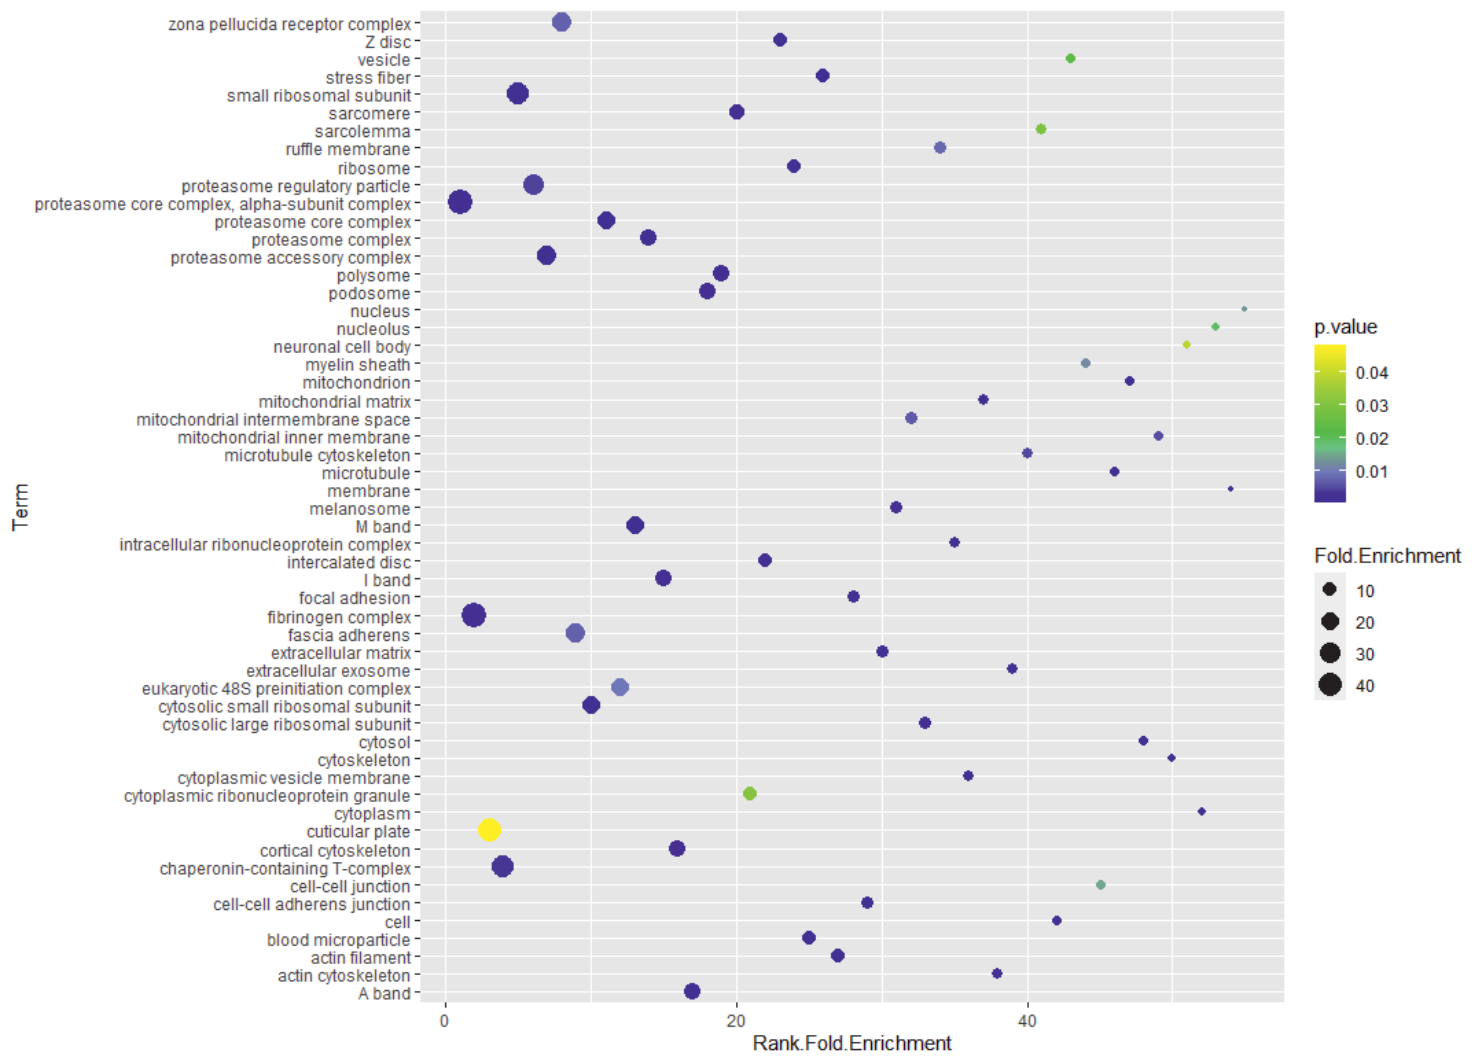

Cluster 2 KEGG Pathway

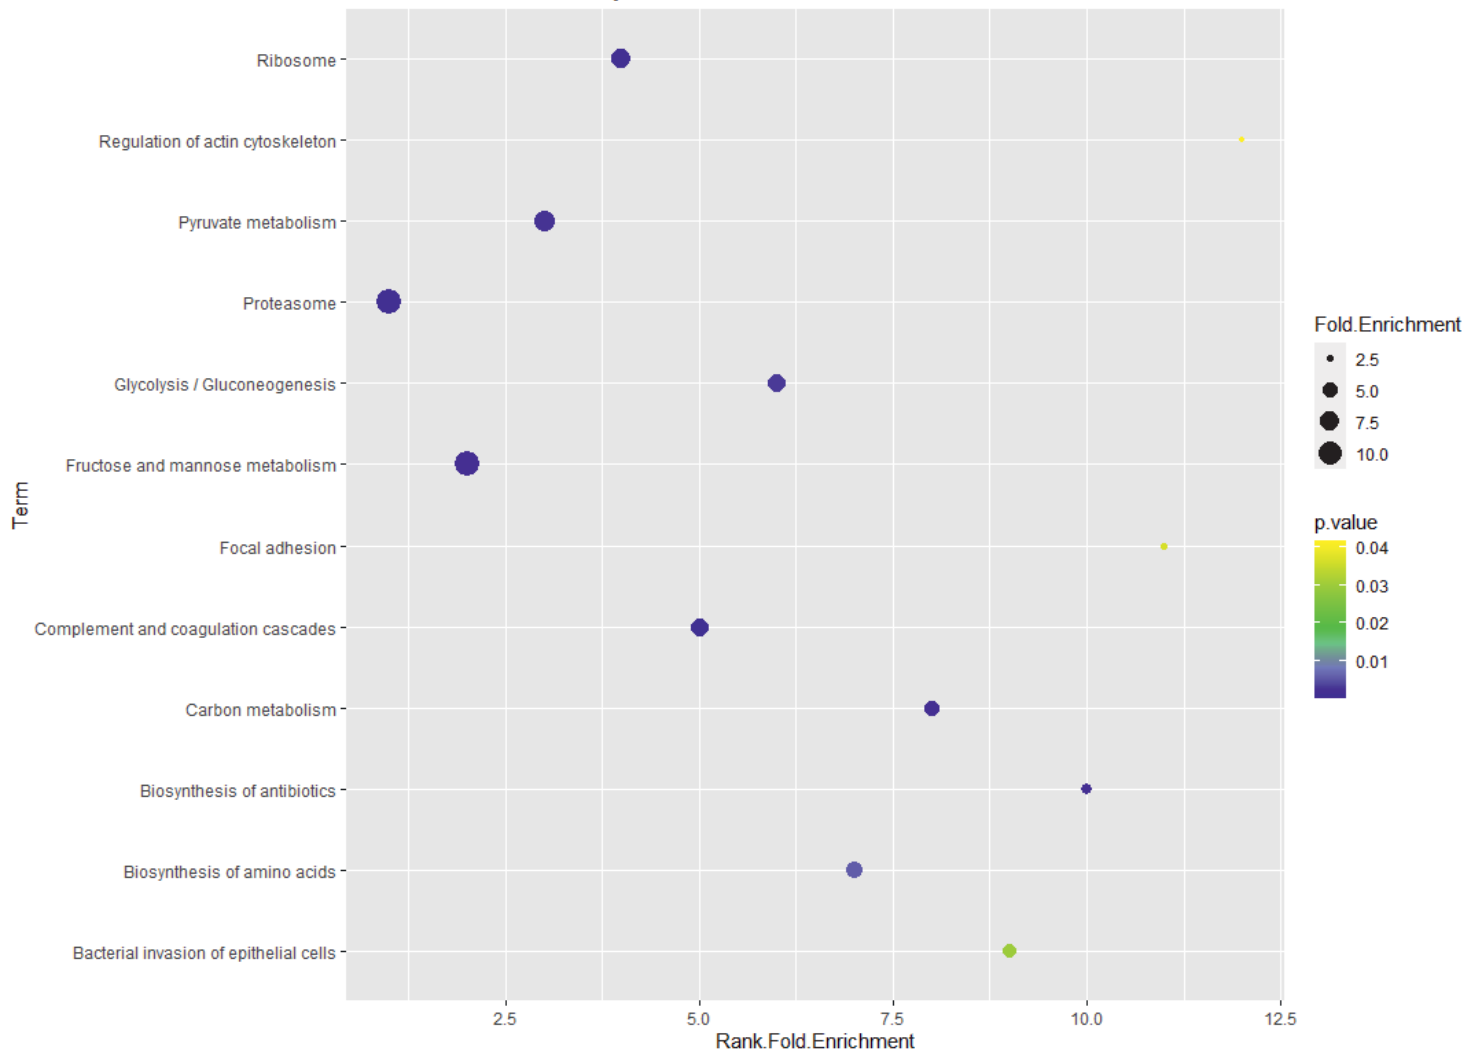

Cluster 3 GO Term CC

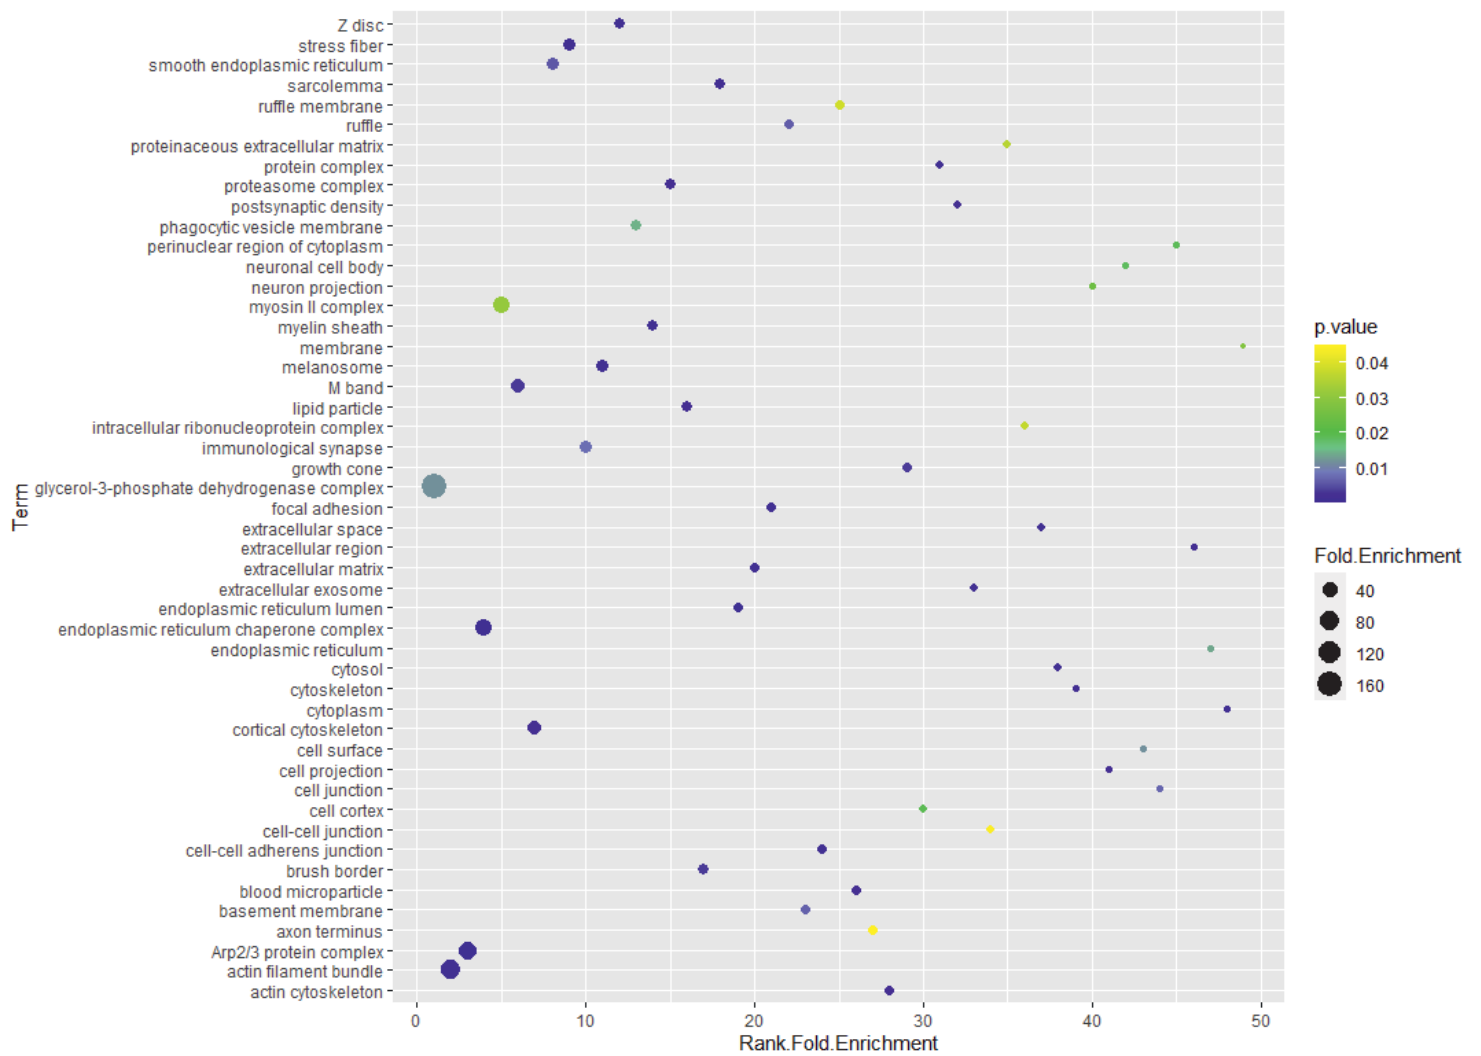

Cluster 3 KEGG Pathway

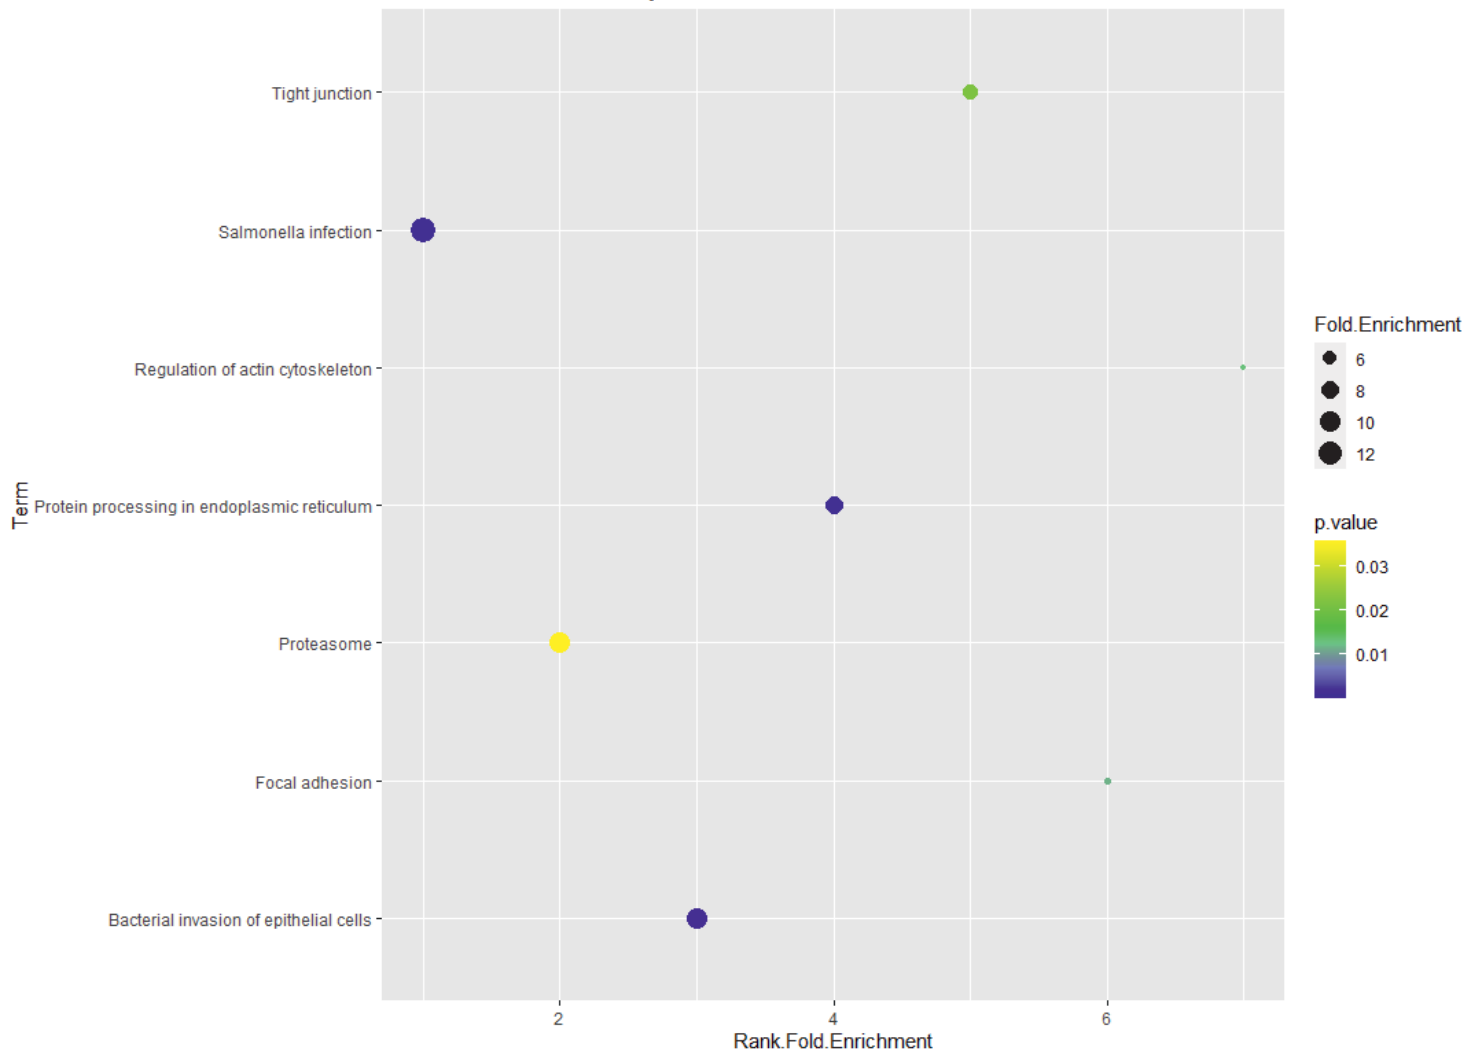

Cluster 4 GO Term CC

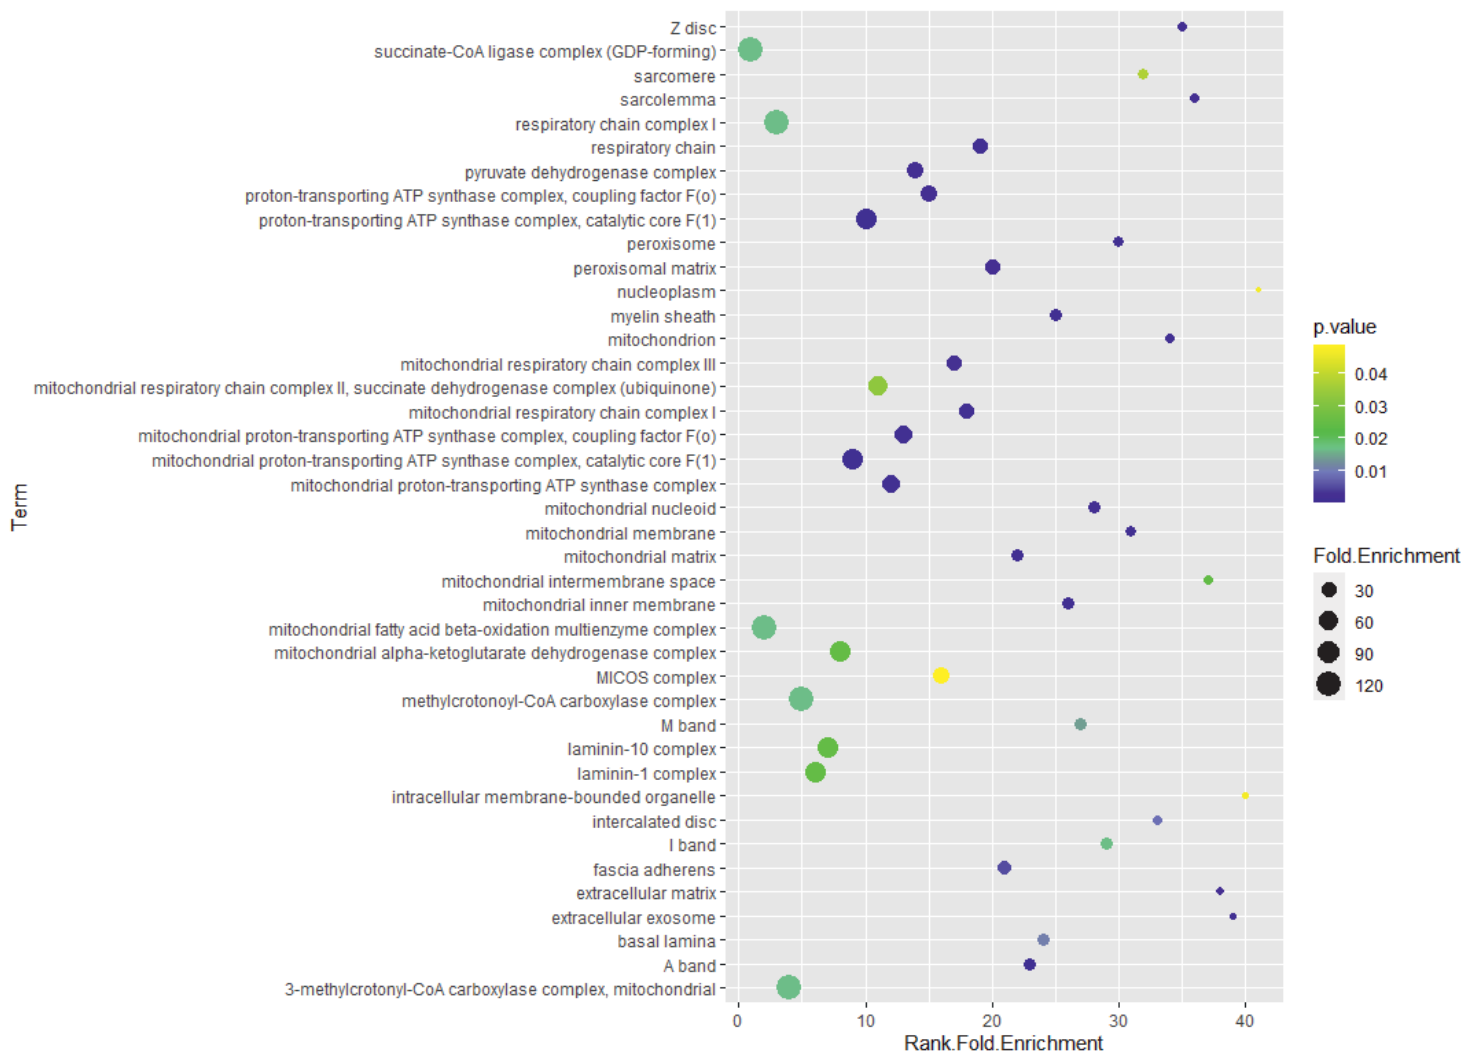

Cluster 4 KEGG Pathway

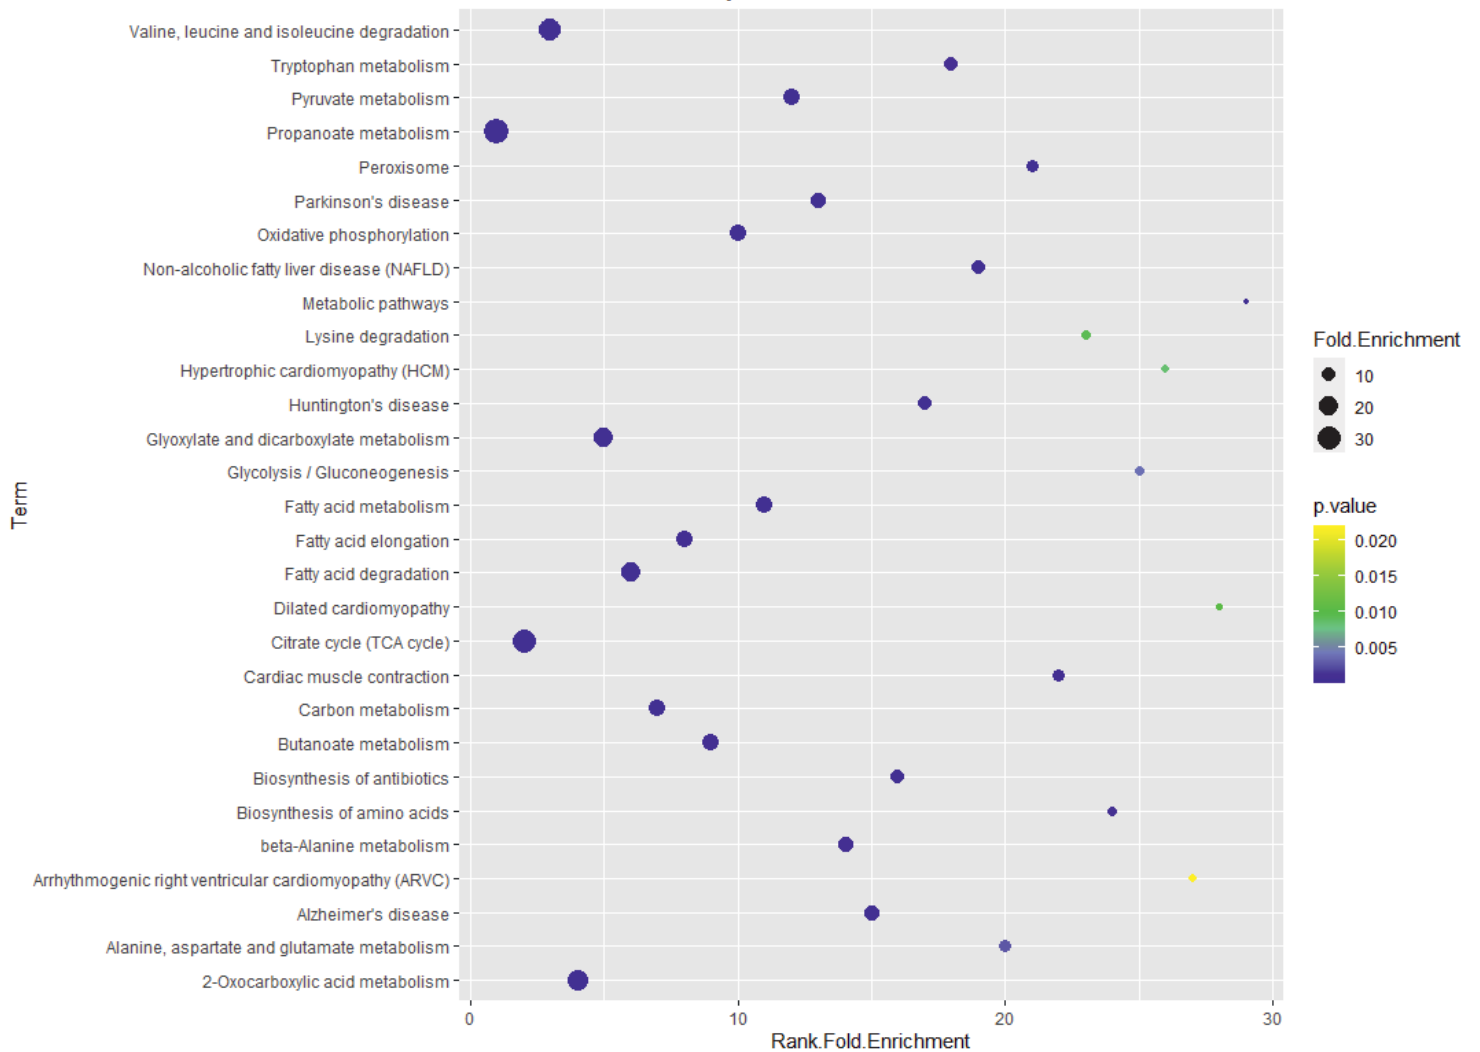

Cluster 5 GO Term CC

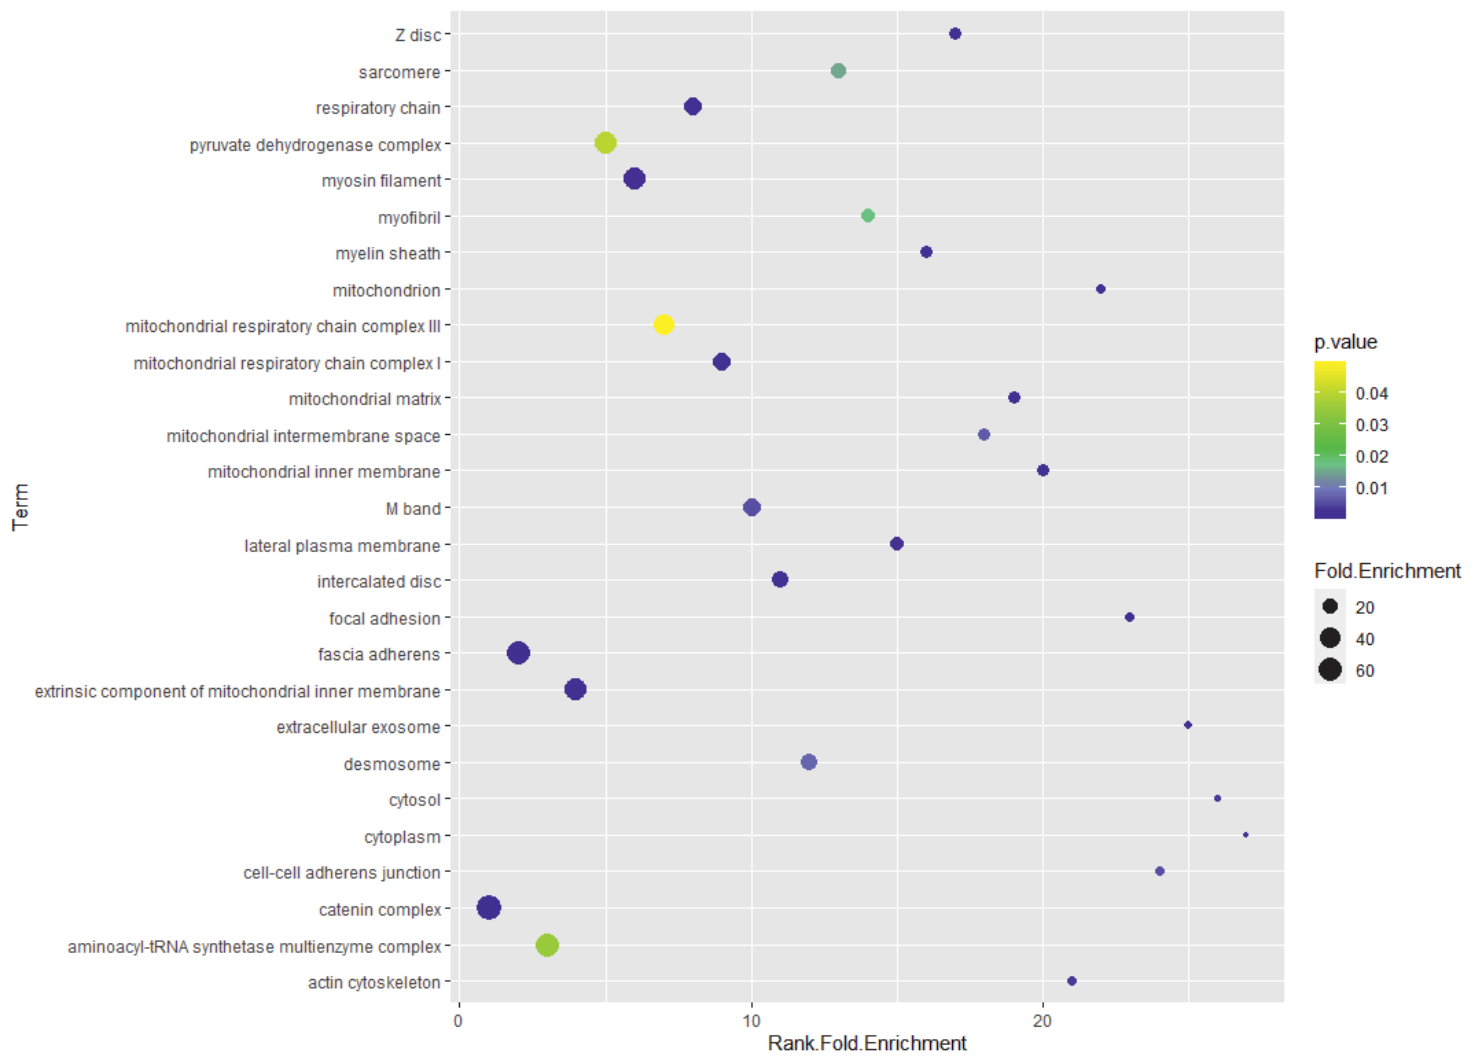

Cluster 5 KEGG Pathway

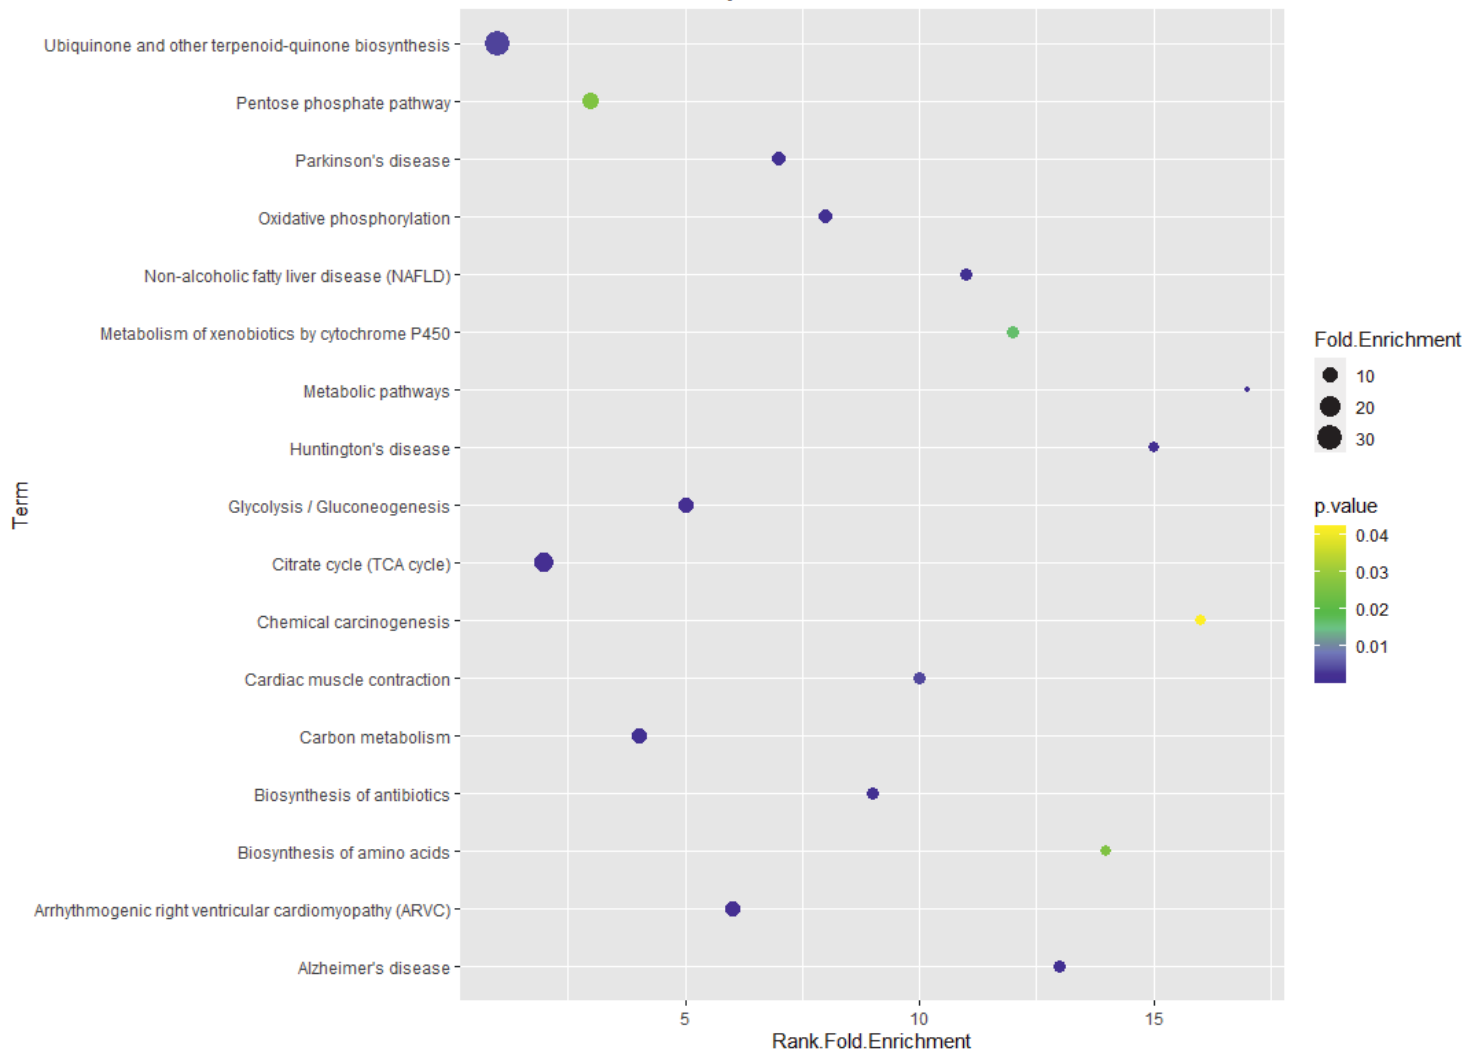

Cluster 6 GO Term CC

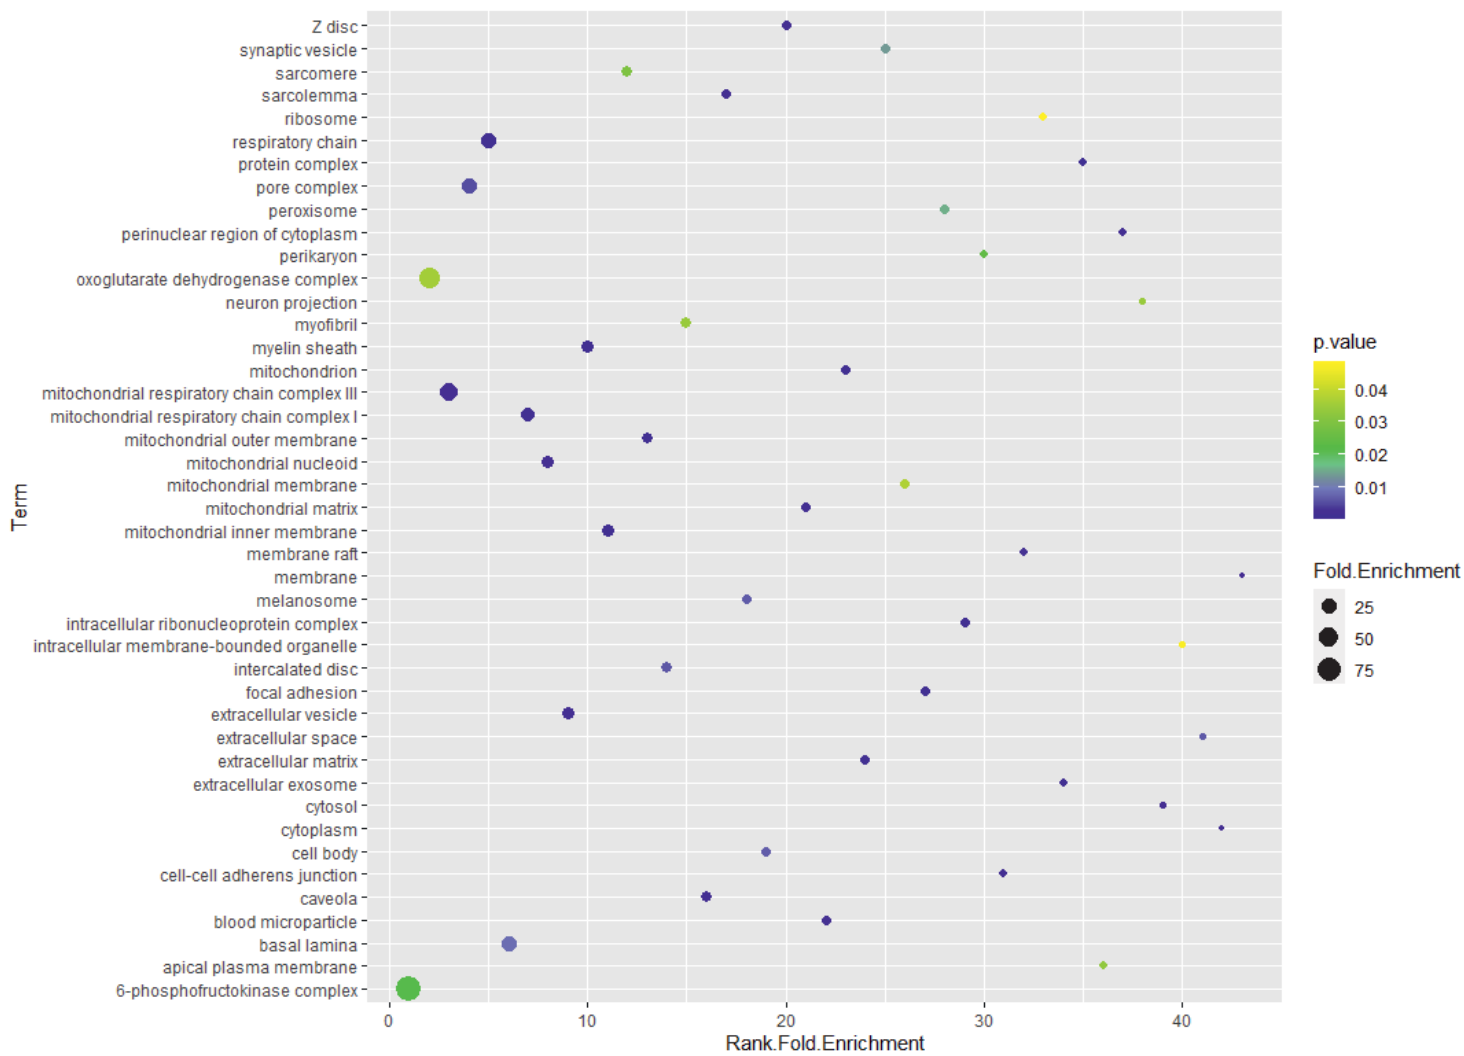

Cluster 6 KEGG Pathway

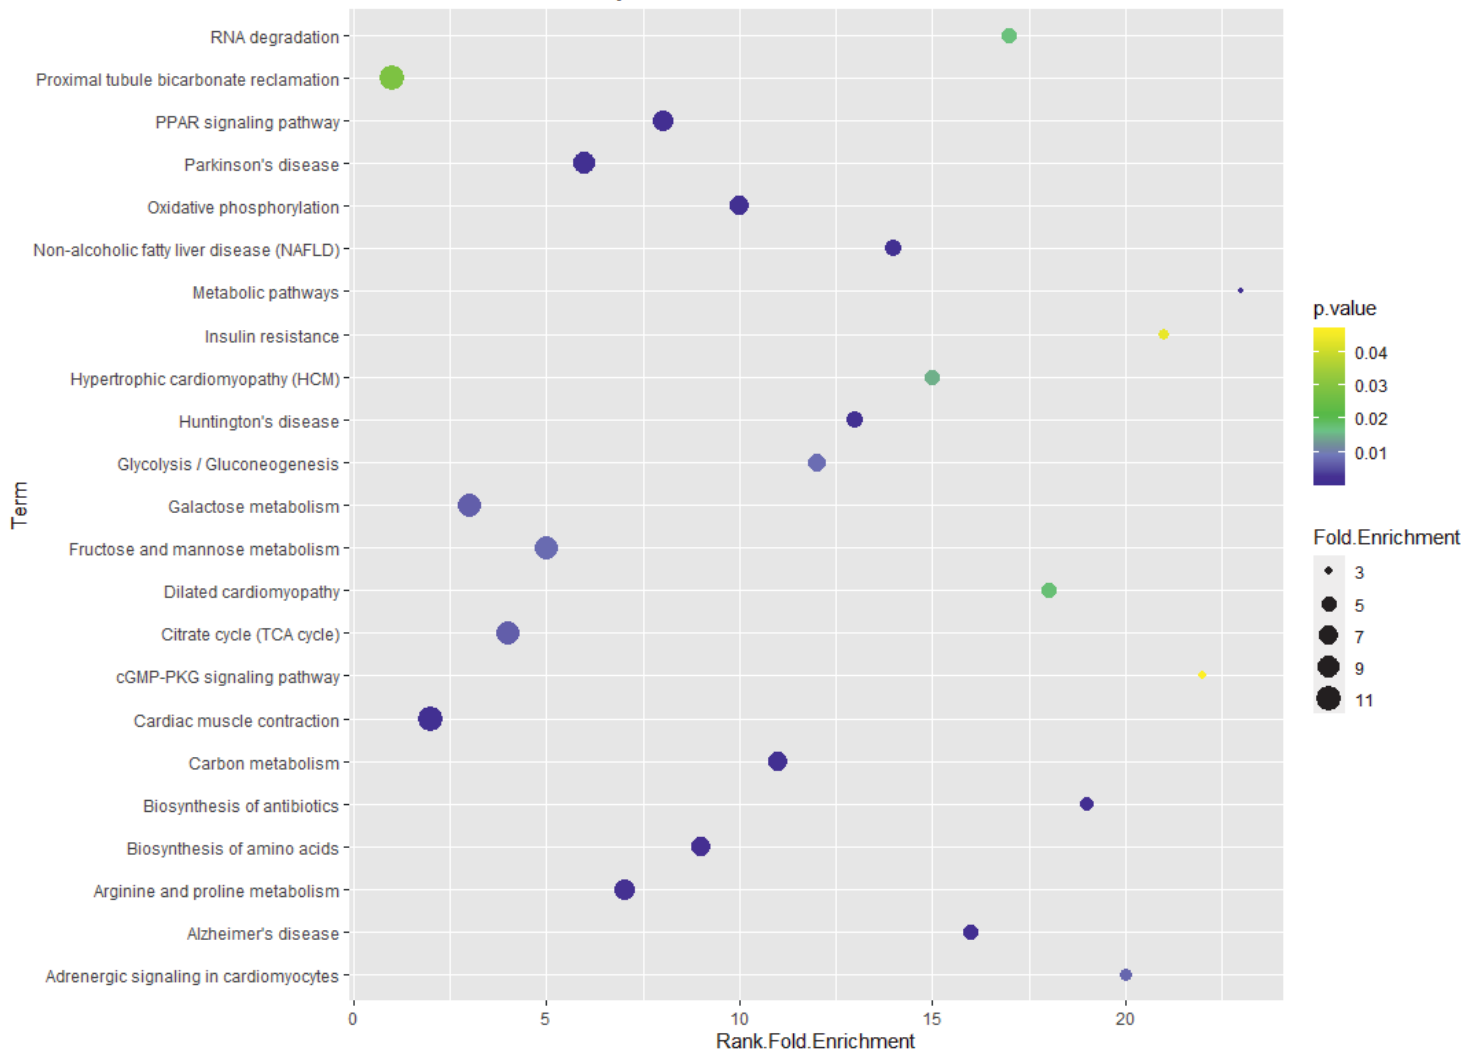

Supplement: s1 [file s1]
