# Supplementary material for: Desmin Knock-Out Cardiomyopathy: A Heart on the Verge of Metabolic Crisis
Source: Int J Mol Sci. 2022 Oct 10;23(19):12020. doi: 10.3390/ijms231912020 (PMC9570457; doi:10.3390/ijms231912020)
Supplement: Supplementary file 1 [file ijms-23-12020-s001.zip › 2022-09-28_DesKO-Mito_Table-S1_v2.xlsx]

## Sheet: table caption
Supplementary Table S1. Hierarchical clustering of all proteins quantitated by mass spectrometry by GO and KEGG terms.

## Sheet: KEGG Cluster 1
category	term	count	%	p-value	protein IDs	list total	pop hits	pop total	fold enrichment	Bonferroni	Benjamini	FDR
KEGG_PATHWAY	mmu05205:Proteoglycans in cancer	5	11.3636	0.00385703	P28654, Q80X90, P26041, P51885, P29788	26	203	7691	7.2859	0.225127	0.254564	0.254564
KEGG_PATHWAY	mmu00500:Starch and sucrose metabolism	2	4.54545	0.0991333	P17710, Q91ZJ5	26	32	7691	18.488	0.998982	1	1
KEGG_PATHWAY	mmu00052:Galactose metabolism	2	4.54545	0.0991333	P17710, Q91ZJ5	26	32	7691	18.488	0.998982	1	1

## Sheet: GO CC Cluster 1
category	term	count	%	p-value	protein IDs	list total	pop hits	pop total	fold enrichment	Bonferroni	Benjamini	FDR
GOTERM_CC_DIRECT	GO:0070062~extracellular exosome	34	77.2727	9.7087e-21	Q61598, P10639, Q7TPR4, Q9CZY3, Q9EQK5, P07724, P26041, Q9JKB1, Q68FD5, P20918, P18760, P51885, Q91ZJ5, O55131, P61161, P16045, Q8CIE6, P40142, P62196, Q00896, Q60605, P20152, P42208, P29788, Q61147, P80314, Q80X90, Q9EQH3, P10107, P68372, P35293, Q01339, Q00623, Q921I1	44	2674	19662	5.68189	1.90291e-18	1.90291e-18	1.69902e-18
GOTERM_CC_DIRECT	GO:0031012~extracellular matrix	13	29.5455	1.01306e-12	P80314, P28654, Q80X90, Q68FD5, P18760, P68372, P51885, P16045, Q01339, Q60605, P48678, P20152, P29788	44	294	19662	19.7593	1.98563e-10	9.92801e-11	8.86429e-11
GOTERM_CC_DIRECT	GO:0005615~extracellular space	18	40.9091	5.94695e-09	Q61147, P28654, Q7TPR4, P07724, P26041, P10107, P20918, P18760, Q62188, P51885, Q8CIE6, P16045, Q01339, Q00623, Q00896, P23953, Q921I1, P29788	44	1504	19662	5.3481	1.1656e-06	3.78905e-07	3.38308e-07
GOTERM_CC_DIRECT	GO:0043209~myelin sheath	9	20.4545	7.73276e-09	Q61598, P80314, O55131, P07724, P26041, P40142, Q68FD5, P68372, P42208	44	192	19662	20.9467	1.51562e-06	3.78905e-07	3.38308e-07
GOTERM_CC_DIRECT	GO:0072562~blood microparticle	8	18.1818	1.45418e-08	Q61147, P07724, P26041, Q00623, P62196, P20918, Q921I1, P29788	44	133	19662	26.879	2.8502e-06	5.7004e-07	5.08965e-07
GOTERM_CC_DIRECT	GO:0005925~focal adhesion	10	22.7273	1.37621e-07	Q61598, Q80X90, P61161, Q7TPR4, P26041, P10107, Q68FD5, P19253, P20152, P18760	44	391	19662	11.4287	2.69734e-05	4.49563e-06	4.01395e-06
GOTERM_CC_DIRECT	GO:0005737~cytoplasm	32	72.7273	3.0537e-07	Q61598, P10639, Q7TPR4, Q9CZY3, Q9EQK5, P07724, P26041, Q9JIF9, Q9JKB1, P19253, P18760, Q62188, Q91ZJ5, O55131, P61161, P16045, Q8CIE6, F7CVJ5, P62196, P20152, P42208, P29788, P80314, P28654, Q80X90, Q9EQH3, P10107, Q3B7Z2, P68372, Q01339, P48678, Q91Z83	44	6631	19662	2.15648	5.98508e-05	8.55037e-06	7.63426e-06
GOTERM_CC_DIRECT	GO:0031982~vesicle	7	15.9091	1.45091e-06	Q61598, P26041, P40142, P10107, Q60605, P18760, Q921I1	44	164	19662	19.0734	0.000284339	3.55473e-05	3.17387e-05
GOTERM_CC_DIRECT	GO:0005576~extracellular region	15	34.0909	1.24774e-05	Q61147, P10639, P28654, P07724, P10107, P20918, P18760, P51885, Q8CIE6, P16045, Q01339, Q00623, Q00896, Q921I1, P29788	44	1753	19662	3.8237	0.00244261	0.000271731	0.000242617
GOTERM_CC_DIRECT	GO:0005856~cytoskeleton	11	25	0.000112098	O55131, Q9EQK5, Q80X90, P61161, Q7TPR4, P26041, Q9JIF9, P20152, P18760, P68372, P42208	44	1113	19662	4.41644	0.0217327	0.002189	0.00195446
GOTERM_CC_DIRECT	GO:0031232~extrinsic component of external side of plasma membrane	3	6.81818	0.000129723	P10107, P20918, Q921I1	44	8	19662	167.574	0.0251069	0.002189	0.00195446
GOTERM_CC_DIRECT	GO:0042995~cell projection	9	20.4545	0.00013402	O55131, P61161, Q7TPR4, P26041, P10107, P20152, P18760, P42208, Q62188	44	712	19662	5.64856	0.0259277	0.002189	0.00195446
GOTERM_CC_DIRECT	GO:0030018~Z disc	5	11.3636	0.00015374	Q80X90, Q7TPR4, Q9JIF9, F7CVJ5, Q91Z83	44	124	19662	18.0187	0.0296859	0.00231793	0.00206958
GOTERM_CC_DIRECT	GO:0009986~cell surface	8	18.1818	0.00039229	P16045, P26041, Q01339, P10107, Q00623, P20918, P42208, Q921I1	44	629	19662	5.68348	0.0740213	0.00549207	0.00490363
GOTERM_CC_DIRECT	GO:0001725~stress fiber	4	9.09091	0.000423352	O55131, Q80X90, Q7TPR4, Q91Z83	44	67	19662	26.6784	0.0796438	0.00553179	0.0049391
GOTERM_CC_DIRECT	GO:0005829~cytosol	12	27.2727	0.0012482	P17710, P10639, P61161, P16045, Q9EQH3, P10107, Q00623, Q68FD5, Q3B7Z2, P20152, P18760, Q62188	44	1784	19662	3.00581	0.217138	0.0152904	0.0136522
GOTERM_CC_DIRECT	GO:0044297~cell body	4	9.09091	0.00143879	P80314, O55131, P20152, Q62188	44	102	19662	17.5241	0.245881	0.0165884	0.014811
GOTERM_CC_DIRECT	GO:0048471~perinuclear region of cytoplasm	7	15.9091	0.0037373	Q9EQK5, P26041, P48678, Q3B7Z2, P20152, P42208, Q921I1	44	692	19662	4.5203	0.519959	0.0395296	0.0352942
GOTERM_CC_DIRECT	GO:0005938~cell cortex	4	9.09091	0.00383195	O55131, Q80X90, P61161, P42208	44	144	19662	12.4129	0.528815	0.0395296	0.0352942
GOTERM_CC_DIRECT	GO:1903561~extracellular vesicle	3	6.81818	0.00514734	Q00623, Q68FD5, P68372	44	49	19662	27.359	0.636321	0.0504439	0.0450392
GOTERM_CC_DIRECT	GO:0030315~T-tubule	3	6.81818	0.00690889	P26041, F7CVJ5, Q68FD5	44	57	19662	23.5191	0.743042	0.064483	0.0575741
GOTERM_CC_DIRECT	GO:0031105~septin complex	2	4.54545	0.0108882	O55131, P42208	44	5	19662	178.745	0.883024	0.0970038	0.0866105
GOTERM_CC_DIRECT	GO:0043234~protein complex	6	13.6364	0.0115657	P17710, O55131, Q9CZY3, P07724, P10107, Q68FD5	44	628	19662	4.2694	0.897725	0.0985598	0.0879999
GOTERM_CC_DIRECT	GO:0005903~brush border	3	6.81818	0.0123218	Q80X90, Q7TPR4, Q60605	44	77	19662	17.4103	0.911969	0.100628	0.0898463
GOTERM_CC_DIRECT	GO:0031410~cytoplasmic vesicle	6	13.6364	0.0129481	Q8CIE6, P10107, Q00623, P62196, Q68FD5, Q921I1	44	646	19662	4.15044	0.922262	0.101513	0.0906369
GOTERM_CC_DIRECT	GO:0005604~basement membrane	3	6.81818	0.0190752	P07724, Q921I1, P29788	44	97	19662	13.8205	0.97706	0.143798	0.128391
GOTERM_CC_DIRECT	GO:0042383~sarcolemma	3	6.81818	0.0274785	Q9JIF9, P10107, Q68FD5	44	118	19662	11.3609	0.995751	0.196482	0.17543
GOTERM_CC_DIRECT	GO:0042627~chylomicron	2	4.54545	0.0280688	Q01339, Q00623	44	13	19662	68.7483	0.996228	0.196482	0.17543
GOTERM_CC_DIRECT	GO:0005913~cell-cell adherens junction	4	9.09091	0.0316247	O55131, Q80X90, P10107, P42208	44	316	19662	5.6565	0.998161	0.206615	0.184477
GOTERM_CC_DIRECT	GO:0005578~proteinaceous extracellular matrix	4	9.09091	0.0316247	P28654, P16045, P51885, P29788	44	316	19662	5.6565	0.998161	0.206615	0.184477
GOTERM_CC_DIRECT	GO:0016324~apical plasma membrane	4	9.09091	0.0347501	P35293, P26041, P10107, Q921I1	44	328	19662	5.44956	0.999024	0.21971	0.19617
GOTERM_CC_DIRECT	GO:0034361~very-low-density lipoprotein particle	2	4.54545	0.0407627	Q01339, Q00623	44	19	19662	47.0383	0.999713	0.246702	0.220269
GOTERM_CC_DIRECT	GO:0005634~nucleus	20	45.4545	0.0415365	P10639, Q7TPR4, Q9EQK5, Q9CZY3, P07724, P26041, P10107, Q9JKB1, P19253, Q3B7Z2, P18760, P68372, Q91ZJ5, O55131, P16045, P40142, Q00623, P62196, P48678, P42208	44	6019	19662	1.48484	0.999755	0.246702	0.220269
GOTERM_CC_DIRECT	GO:0034364~high-density lipoprotein particle	2	4.54545	0.0449579	Q01339, Q00623	44	21	19662	42.5584	0.999879	0.259169	0.231401
GOTERM_CC_DIRECT	GO:0031513~nonmotile primary cilium	2	4.54545	0.0636156	O55131, P42208	44	30	19662	29.7909	0.999997	0.346351	0.309242
GOTERM_CC_DIRECT	GO:0030117~membrane coat	2	4.54545	0.0636156	Q8CIE6, Q68FD5	44	30	19662	29.7909	0.999997	0.346351	0.309242
GOTERM_CC_DIRECT	GO:0015629~actin cytoskeleton	3	6.81818	0.0714693	O55131, P18760, P42208	44	201	19662	6.66961	1	0.378594	0.33803
GOTERM_CC_DIRECT	GO:0009925~basal plasma membrane	2	4.54545	0.0879395	P35293, Q921I1	44	42	19662	21.2792	1	0.451998	0.40357
GOTERM_CC_DIRECT	GO:0030864~cortical actin cytoskeleton	2	4.54545	0.0899385	Q7TPR4, P18760	44	43	19662	20.7844	1	0.451998	0.40357

## Sheet: KEGG Cluster 2
category	term	count	%	p-value	protein IDs	list total	pop hits	pop total	fold enrichment	Bonferroni	Benjamini	FDR
KEGG_PATHWAY	mmu03010:Ribosome	16	8.12183	3.52355e-09	P62908, Q9CZX8, P14206, P62270, P14148, Q9CPR4, Q6ZWN5, P14131, P67984, P63323, Q9D8E6, P61358, P62702, P25444, P60867, P62852	117	145	7691	7.25352	6.02527e-07	6.02527e-07	5.88433e-07
KEGG_PATHWAY	mmu03050:Proteasome	8	4.06091	4.18278e-06	Q9D8W5, Q9R1P0, Q8BG32, Q8VDM4, Q9Z2U1, Q9QUM9, O88685, Q9Z2U0	117	45	7691	11.6862	0.000715002	0.000357628	0.000349262
KEGG_PATHWAY	mmu00051:Fructose and mannose metabolism	6	3.04569	0.000140439	Q924M7, O08528, Q8BZA9, Q9WUA3, P17751, Q9Z2M7	117	34	7691	11.6003	0.0237307	0.00800503	0.00781778
KEGG_PATHWAY	mmu01200:Carbon metabolism	9	4.56853	0.000344524	Q05920, P24270, O88844, P16858, O08528, Q9WUA3, Q8QZS1, Q93092, P17751	117	116	7691	5.10013	0.0572213	0.0147284	0.0143839
KEGG_PATHWAY	mmu04610:Complement and coagulation cascades	7	3.5533	0.00095752	Q61247, O08677, Q00898, Q00897, P19221, Q8VCM7, P01027	117	76	7691	6.05454	0.1511	0.0327472	0.0319812
KEGG_PATHWAY	mmu01130:Biosynthesis of antibiotics	11	5.58376	0.00140499	P24270, P06151, O88844, Q9WTP7, P16858, Q9Z0S1, O08528, Q9DBF1, Q9WUA3, Q93092, P17751	117	214	7691	3.3789	0.213704	0.0400421	0.0391054
KEGG_PATHWAY	mmu00620:Pyruvate metabolism	5	2.53807	0.00268962	Q05920, Q99KB8, P06151, Q9DBF1, Q91Z53	117	39	7691	8.42757	0.36906	0.0657035	0.0641666
KEGG_PATHWAY	mmu00010:Glycolysis / Gluconeogenesis	6	3.04569	0.0030756	P06151, P16858, O08528, Q9DBF1, Q9WUA3, P17751	117	66	7691	5.97591	0.409472	0.0657409	0.0642031
KEGG_PATHWAY	mmu01230:Biosynthesis of amino acids	6	3.04569	0.00564521	Q05920, O88844, P16858, Q9WUA3, Q93092, P17751	117	76	7691	5.18961	0.620183	0.107259	0.10475
KEGG_PATHWAY	mmu05100:Bacterial invasion of epithelial cells	5	2.53807	0.0298407	P63001, P26231, Q64727, P11276, Q80UG5	117	78	7691	4.21378	0.994375	0.510277	0.49834
KEGG_PATHWAY	mmu04510:Focal adhesion	8	4.06091	0.036631	Q04857, P63001, Q9JI91, Q64727, P62141, Q6PDN3, Q71LX4, P11276	117	207	7691	2.54048	0.998307	0.569446	0.556125
KEGG_PATHWAY	mmu04810:Regulation of actin cytoskeleton	8	4.06091	0.0417273	P63001, Q9JI91, Q64727, P45591, P62141, Q6PDN3, P19221, P11276	117	213	7691	2.46892	0.999317	0.594613	0.580704
KEGG_PATHWAY	mmu05010:Alzheimer's disease	7	3.5533	0.0508342	P00848, P11152, Q8K3J1, P16858, P0DP28, P19783, Q3U422	117	177	7691	2.59969	0.999866	0.663983	0.648452
KEGG_PATHWAY	mmu05134:Legionellosis	4	2.03046	0.0543612	Q99JZ4, Q9D8N0, P01027, P59017	117	57	7691	4.61299	0.999929	0.663983	0.648452
KEGG_PATHWAY	mmu00640:Propanoate metabolism	3	1.52284	0.0619768	Q9D9V3, P06151, Q8QZS1	117	27	7691	7.30389	0.999982	0.706536	0.690009
KEGG_PATHWAY	mmu05230:Central carbon metabolism in cancer	4	2.03046	0.0718509	Q8BFP9, O08528, Q8BZA9, Q9WUA3	117	64	7691	4.10844	0.999997	0.767906	0.749944
KEGG_PATHWAY	mmu00970:Aminoacyl-tRNA biosynthesis	4	2.03046	0.0772591	Q8VDC0, D3Z158, Q922B2, Q61035	117	66	7691	3.98394	0.999999	0.777136	0.758957
KEGG_PATHWAY	mmu04114:Oocyte meiosis	5	2.53807	0.0886643	P62141, P0DP28, P61982, P62259, Q76MZ3	117	112	7691	2.9346	1	0.808044	0.789143
KEGG_PATHWAY	mmu01100:Metabolic pathways	26	13.198	0.0913622	O08709, Q8K3J1, P16858, O08528, Q9DBF1, Q93092, P17751, Q9Z1J3, P00848, Q05920, Q9D7B6, Q9Z0S1, Q91Z53, P63005, Q8QZS1, P34914, Q924M7, D3Z158, Q3V1L4, P19783, Q9Z2M7, Q3U422, O55023, P06151, O88844, Q9WUA3	117	1269	7691	1.34682	1	0.808044	0.789143
KEGG_PATHWAY	mmu04520:Adherens junction	4	2.03046	0.0945081	P63001, Q9JI91, P26231, Q64727	117	72	7691	3.65195	1	0.808044	0.789143

## Sheet: GO CC Cluster 2
category	term	count	%	p-value	protein IDs	list total	pop hits	pop total	fold enrichment	Bonferroni	Benjamini	FDR
GOTERM_CC_DIRECT	GO:0019773~proteasome core complex, alpha-subunit complex	4	2.03046	7.48891e-05	Q9R1P0, Q9Z2U1, Q9QUM9, Q9Z2U0	194	9	19662	45.0447	0.0218509	0.00129955	0.00110572
GOTERM_CC_DIRECT	GO:0005577~fibrinogen complex	3	1.52284	0.00194875	Q61247, Q8VCM7, P11276	194	7	19662	43.4359	0.437544	0.0169083	0.0143864
GOTERM_CC_DIRECT	GO:0032437~cuticular plate	2	1.01523	0.0481301	Q62261, E9Q447	194	5	19662	40.5402	1	0.258153	0.219648
GOTERM_CC_DIRECT	GO:0005832~chaperonin-containing T-complex	3	1.52284	0.00329777	P80315, P80313, P80318	194	9	19662	33.7835	0.6226	0.0256011	0.0217826
GOTERM_CC_DIRECT	GO:0015935~small ribosomal subunit	9	4.56853	2.68107e-10	P62908, P14131, Q6ZWN5, P62702, P14206, P62270, P25444, P60867, P62852	194	29	19662	31.4536	7.90916e-08	7.90916e-09	6.72949e-09
GOTERM_CC_DIRECT	GO:0005838~proteasome regulatory particle	3	1.52284	0.00409566	Q9D8W5, Q8BG32, Q8VDM4	194	10	19662	30.4052	0.702011	0.03098	0.0263592
GOTERM_CC_DIRECT	GO:0005915~zonula adherens	2	1.01523	0.0667305	P26231, Q64727	194	7	19662	28.9573	1	0.329254	0.280145
GOTERM_CC_DIRECT	GO:0031595~nuclear proteasome complex	2	1.01523	0.0758946	Q9D8W5, O88685	194	8	19662	25.3376	1	0.361112	0.307251
GOTERM_CC_DIRECT	GO:0022624~proteasome accessory complex	4	2.03046	0.000572112	Q9D8W5, Q8BG32, Q8VDM4, O88685	194	17	19662	23.8472	0.15534	0.00649127	0.00552308
GOTERM_CC_DIRECT	GO:0002199~zona pellucida receptor complex	3	1.52284	0.00696305	P80315, P80313, P80318	194	13	19662	23.3886	0.87271	0.0466841	0.039721
GOTERM_CC_DIRECT	GO:0005916~fascia adherens	3	1.52284	0.00696305	Q64727, Q71LX4, E9Q447	194	13	19662	23.3886	0.87271	0.0466841	0.039721
GOTERM_CC_DIRECT	GO:0008541~proteasome regulatory particle, lid subcomplex	2	1.01523	0.0849692	Q9D8W5, Q8BG32	194	9	19662	22.5223	1	0.379787	0.323141
GOTERM_CC_DIRECT	GO:0022627~cytosolic small ribosomal subunit	11	5.58376	8.88515e-11	P62908, P14131, Q6ZWN5, P63323, Q9CZX8, P62702, P14206, P62270, P25444, P60867, P62852	194	53	19662	21.035	2.62112e-08	2.91236e-09	2.47797e-09
GOTERM_CC_DIRECT	GO:0005839~proteasome core complex	4	2.03046	0.000938562	Q9R1P0, Q9Z2U1, Q9QUM9, Q9Z2U0	194	20	19662	20.2701	0.24195	0.0102547	0.00872515
GOTERM_CC_DIRECT	GO:0033290~eukaryotic 48S preinitiation complex	3	1.52284	0.0092534	Q3UGC7, Q6ZWX6, P60229	194	15	19662	20.2701	0.935588	0.0593425	0.0504914
GOTERM_CC_DIRECT	GO:0031430~M band	4	2.03046	0.00124971	P56565, E9QQ96, Q62261, P14602	194	22	19662	18.4274	0.308503	0.0127126	0.0108165
GOTERM_CC_DIRECT	GO:0000502~proteasome complex	11	5.58376	8.60911e-10	Q9D8W5, Q9JMA1, Q9R1P0, Q8BG32, Q8VDM4, Q9Z2U1, Q9QUM9, O88685, P14602, Q8CDN6, Q9Z2U0	194	66	19662	16.8918	2.53969e-07	2.30881e-08	1.96444e-08
GOTERM_CC_DIRECT	GO:0031674~I band	4	2.03046	0.00161896	P56565, P45591, P14602, Q8CIB5	194	24	19662	16.8918	0.379966	0.0149248	0.0126987
GOTERM_CC_DIRECT	GO:0030863~cortical cytoskeleton	5	2.53807	0.000230088	P21107, Q62261, P47757, E9Q447, P04919	194	31	19662	16.3469	0.0656309	0.00339379	0.0028876
GOTERM_CC_DIRECT	GO:0031672~A band	4	2.03046	0.00182652	P56565, Q9D8E6, P14148, Q9CPR4	194	25	19662	16.2161	0.416854	0.016328	0.0138927
GOTERM_CC_DIRECT	GO:0002102~podosome	5	2.53807	0.000260951	P21107, Q64727, Q8K4L3, O88342, Q61233	194	32	19662	15.836	0.0741013	0.00366574	0.00311898
GOTERM_CC_DIRECT	GO:0005844~polysome	6	3.04569	6.15242e-05	P62908, P62702, Q9QUM9, P14148, Q9CPR4, P62852	194	43	19662	14.1419	0.0179865	0.00113435	0.00096516
GOTERM_CC_DIRECT	GO:0030017~sarcomere	5	2.53807	0.000461273	Q9JI91, Q5SX39, E9QQ96, Q9QUM9, P0DP28	194	37	19662	13.696	0.127251	0.00618526	0.00526271
GOTERM_CC_DIRECT	GO:0036464~cytoplasmic ribonucleoprotein granule	3	1.52284	0.0306527	P63001, P09405, P62702	194	28	19662	10.859	0.999897	0.170614	0.145167
GOTERM_CC_DIRECT	GO:0014704~intercalated disc	5	2.53807	0.00156849	P26231, Q64727, Q9CQ73, P47757, P04919	194	51	19662	9.93633	0.370651	0.0149248	0.0126987
GOTERM_CC_DIRECT	GO:0030018~Z disc	12	6.09137	3.94912e-08	Q9JI91, P56565, Q64727, A0A0G2JFD8, P45591, E9QQ96, Q8BWB1, P14602, P47757, E9Q447, P04919, D9J302	194	124	19662	9.80811	1.16498e-05	8.96147e-07	7.62484e-07
GOTERM_CC_DIRECT	GO:0005840~ribosome	17	8.62944	5.48781e-11	P62908, Q9CQN7, Q9CZX8, P14206, P62270, P14148, Q9CPR4, Q6ZWN5, P14131, P67984, Q9D8E6, P61358, P62702, Q6ZWX6, P25444, P60867, P62852	194	188	19662	9.16467	1.6189e-08	2.02363e-09	1.7218e-09
GOTERM_CC_DIRECT	GO:0072562~blood microparticle	12	6.09137	8.16144e-08	P29699, Q61247, O08677, A6X935, P19221, Q8VCM7, P01027, Q9ESB3, P11276, Q9Z2W0, P04919, Q06890	194	133	19662	9.14441	2.4076e-05	1.71973e-06	1.46323e-06
GOTERM_CC_DIRECT	GO:0001725~stress fiber	6	3.04569	0.000510366	P21107, Q64727, Q6PDN3, Q8CIB5, Q80UG5, Q61233	194	67	19662	9.07617	0.139805	0.00627325	0.00533758
GOTERM_CC_DIRECT	GO:0005884~actin filament	6	3.04569	0.000546535	P63001, Q64727, O88342, P47757, Q61233, E9QA15	194	68	19662	8.94269	0.148939	0.00644912	0.00548722
GOTERM_CC_DIRECT	GO:0031941~filamentous actin	3	1.52284	0.0510106	P21107, Q9WTI7, Q8CIB5	194	37	19662	8.21761	1	0.268717	0.228637
GOTERM_CC_DIRECT	GO:0005925~focal adhesion	31	15.736	1.82429e-18	A0A0G2JFD8, Q64727, Q8K4L3, P97447, Q71LX4, Q8CIB5, Q61233, P63001, P67984, P21981, P61982, P25444, P62259, O70400, Q9JI91, P26231, P62908, Q9CZX8, P24270, P14602, P62270, P14148, P17742, P14131, Q6ZWN5, P62141, Q9D8E6, P24369, P61358, P62702, Q9WVE8	194	391	19662	8.03546	5.38166e-16	1.79389e-16	1.52632e-16
GOTERM_CC_DIRECT	GO:0005913~cell-cell adherens junction	24	12.1827	7.68531e-14	O70400, P26231, O08709, Q64727, Q9D8N0, Q61768, B1AYJ9, Q62261, Q9D8Y0, Q9CQ73, Q9EQP2, D9J302, Q9Z1Z0, A0A0R4J1L2, P06151, O88844, P25444, Q9WUA3, P60229, P47757, E9Q447, Q9WVE8, P62259, Q80UG5	194	316	19662	7.69751	2.26641e-11	3.77861e-12	3.21502e-12
GOTERM_CC_DIRECT	GO:0031012~extracellular matrix	22	11.1675	1.42588e-12	P29699, P51881, P62908, Q9CZX8, P16858, P19221, P14206, P14602, P62270, P11276, Q06890, Q04857, P63001, P14131, P67984, P11152, P61358, P21981, Q9JHU4, P60867, Q9WUA3, P62852	194	294	19662	7.58405	4.20629e-10	6.00907e-11	5.1128e-11
GOTERM_CC_DIRECT	GO:0042470~melanosome	7	3.5533	0.00048426	P80315, P63001, P53994, P24369, Q922R8, P62259, P50247	194	101	19662	7.02429	0.133152	0.00621116	0.00528475
GOTERM_CC_DIRECT	GO:0005758~mitochondrial intermembrane space	5	2.53807	0.00635896	P58281, Q9D1L0, P24270, Q9QUH0, Q9WTP7	194	75	19662	6.7567	0.847697	0.0446641	0.0380023
GOTERM_CC_DIRECT	GO:0022625~cytosolic large ribosomal subunit	6	3.04569	0.00203396	P67984, P63323, Q9D8E6, P61358, P14148, Q9CPR4	194	91	19662	6.68245	0.451534	0.0169325	0.014407
GOTERM_CC_DIRECT	GO:0072686~mitotic spindle	3	1.52284	0.0777475	P62908, E9QK48, P27546	194	47	19662	6.46918	1	0.361245	0.307365
GOTERM_CC_DIRECT	GO:0032587~ruffle membrane	5	2.53807	0.00762686	P63001, P62908, Q9WTI7, Q9WVE8, Q61233	194	79	19662	6.41459	0.895498	0.0499983	0.0425409
GOTERM_CC_DIRECT	GO:0032154~cleavage furrow	3	1.52284	0.0835278	P21107, Q8K4L3, Q6PDN3	194	49	19662	6.20513	1	0.379088	0.322546
GOTERM_CC_DIRECT	GO:0030529~intracellular ribonucleoprotein complex	19	9.64467	2.90114e-09	P62908, P09405, Q9CQN7, Q9CZX8, P16858, P70333, P14206, P62270, P14148, Q9CPR4, Q6ZWN5, P14131, P67984, Q9D8E6, P61358, P62702, P25444, P60867, P62852	194	320	19662	6.01769	8.55836e-07	7.13197e-08	6.06822e-08
GOTERM_CC_DIRECT	GO:0030659~cytoplasmic vesicle membrane	7	3.5533	0.00119743	Q1XH17, Q922J3, Q9ESD7, P61982, Q9WVE8, P62259, Q9QYB1	194	120	19662	5.91211	0.297742	0.0126158	0.0107341
GOTERM_CC_DIRECT	GO:0005871~kinesin complex	3	1.52284	0.0924334	Q61768, P63005, P62259	194	52	19662	5.84715	1	0.406983	0.34628
GOTERM_CC_DIRECT	GO:0005759~mitochondrial matrix	10	5.07614	0.000103179	Q9DCM0, P62908, Q05920, Q8CAK1, Q99KB8, Q8VDC0, Q9WTP7, Q8R5L1, Q64433, Q9Z1J3	194	188	19662	5.39098	0.0299808	0.00169099	0.00143878
GOTERM_CC_DIRECT	GO:0015629~actin cytoskeleton	10	5.07614	0.000171317	P26231, Q64727, P45591, Q8K4L3, Q8BWB1, Q9R0P5, O88342, Q80UG5, Q61233, D9J302	194	201	19662	5.04231	0.0492867	0.00265991	0.00226318
GOTERM_CC_DIRECT	GO:0070062~extracellular exosome	122	61.9289	7.50138e-57	P09405, Q64669, O08709, Q9JMH6, P16858, Q9R0P5, Q922B2, Q8VCM7, P04919, O08677, Q9Z2U1, Q9ESB3, P25444, P47757, Q922R8, Q9Z2U0, Q9D358, Q3U2G2, Q924M7, Q9ES97, P19221, P14206, P14602, Q7TQI3, Q64433, Q06890, Q9Z2M7, O55023, P17047, P06151, O88844, Q9WTI7, P24369, Q9QUM9, Q6ZWX6, Q9JHU4, P60867, P60229, Q8CDN6, Q9WVE8, P51881, Q9D8W5, Q6R0H7, Q6PDN3, Q8VDM4, Q93092, Q04857, P00848, P21107, P11152,…	194	2674	19662	4.62407	2.21291e-54	2.21291e-54	1.88285e-54
GOTERM_CC_DIRECT	GO:0015630~microtubule cytoskeleton	7	3.5533	0.00473586	Q922J3, E9QK48, P16858, P63005, P27546, E9Q447, Q9QYB1	194	158	19662	4.49021	0.753501	0.034927	0.0297175
GOTERM_CC_DIRECT	GO:0042383~sarcolemma	5	2.53807	0.0290798	Q04857, Q1XH17, Q64727, Q9ESD7, Q6R0H7	194	118	19662	4.29451	0.999834	0.164972	0.140366
GOTERM_CC_DIRECT	GO:0001726~ruffle	4	2.03046	0.066967	Q922J3, Q6R0H7, Q71LX4, Q61233	194	95	19662	4.26739	1	0.329254	0.280145
GOTERM_CC_DIRECT	GO:0016363~nuclear matrix	4	2.03046	0.0703492	Q9Z1N5, P45591, Q9QUM9, Q9QYB1	194	97	19662	4.1794	1	0.340214	0.28947
GOTERM_CC_DIRECT	GO:0005623~cell	9	4.56853	0.00206634	O08677, O08709, Q9QUH0, Q9D1X0, Q9JMH6, P19221, O08528, Q8CDN6, Q922R8	194	231	19662	3.94872	0.456759	0.0169325	0.014407
GOTERM_CC_DIRECT	GO:0031982~vesicle	6	3.04569	0.0230125	Q6R0H7, Q61768, P16858, P61982, Q9ESB3, P63005	194	164	19662	3.70795	0.998959	0.133111	0.113258
GOTERM_CC_DIRECT	GO:0043209~myelin sheath	7	3.5533	0.011831	P51881, P16858, P61982, O88342, E9Q447, P80318, P17742	194	192	19662	3.69507	0.970132	0.0742587	0.0631828
GOTERM_CC_DIRECT	GO:0005911~cell-cell junction	7	3.5533	0.0145761	P26231, Q64727, Q6PDN3, Q9CQ73, O88342, Q9WVE8, Q9QYB1	194	201	19662	3.52962	0.986853	0.0877539	0.0746652
GOTERM_CC_DIRECT	GO:0005874~microtubule	11	5.58376	0.0015088	P80315, P80313, Q922J3, E9QK48, Q61768, Q9JHU4, P63005, P27546, P80318, Q80UG5, Q8R1Q8	194	327	19662	3.40934	0.359452	0.0148365	0.0126236
GOTERM_CC_DIRECT	GO:0005741~mitochondrial outer membrane	5	2.53807	0.0641052	P58281, Q811U4, P97742, O08528, Q8BZA9	194	153	19662	3.31211	1	0.329254	0.280145
GOTERM_CC_DIRECT	GO:0005739~mitochondrion	54	27.4112	2.41231e-14	O08709, Q99KB8, Q8K3J1, Q505D7, Q9JMH6, P97742, Q9EP89, Q9WTP7, P16858, Q9Z1J3, Q61035, Q8VDK1, Q05920, Q9D7B6, Q9QUH0, Q8BZA9, Q8K199, P19783, Q64433, Q06890, Q3U422, Q9DCM0, P06151, O88844, Q8R5L1, Q8CDN6, P51881, Q811U4, Q9WV98, Q8CAK1, O08528, Q9DBF1, Q9QXX4, P58281, P00848, Q9CXD6, Q8R127, Q8BFP9, P21981, Q9CRD0, Q8QZS1, Q9QYB1, P62259, P62908, Q9D1L0, P80313, Q9CQR4, Q9CQN7, P24270, D3Z158,…	194	1721	19662	3.18009	7.10709e-12	1.52934e-12	1.30123e-12
GOTERM_CC_DIRECT	GO:0005829~cytosol	55	27.9188	2.5921e-14	Q64669, O08709, Q9JMH6, Q99L47, P16858, P17751, Q9Z1J3, Q61233, P63001, Q9QUH0, Q9Z2U1, Q8BZA9, P61982, P63005, Q9Z2U0, Q9D832, P34914, Q9D9V3, P26231, Q3U2G2, Q61768, P14206, Q06890, D9J302, Q9Z2M7, P06151, O88844, Q9WTI7, Q9QUM9, Q8R5L1, Q9WVE8, Q6R0H7, Q5SX39, Q9R1P0, O08528, Q9DBF1, Q93092, O35344, P21981, Q91Z53, Q9QYB1, P62259, P62908, Q9CQR4, Q9CZX8, P24270, D3Z158, P62270, Q76MZ3, P17742,…	194	1784	19662	3.1246	7.63112e-12	1.52934e-12	1.30123e-12
GOTERM_CC_DIRECT	GO:0030027~lamellipodium	5	2.53807	0.0783718	P63001, P26231, Q9ESD7, Q6PDN3, P47757	194	164	19662	3.08995	1	0.361245	0.307365
GOTERM_CC_DIRECT	GO:0005743~mitochondrial inner membrane	11	5.58376	0.00504028	P51881, P58281, P62908, Q9WV98, P00848, Q05920, Q9CXD6, P97742, P19783, Q9QXX4, Q3U422	194	387	19662	2.88076	0.774772	0.0362654	0.0308563
GOTERM_CC_DIRECT	GO:0005856~cytoskeleton	29	14.7208	4.3619e-06	Q922J3, A0A0G2JFD8, Q64727, Q8K4L3, Q6PDN3, Q62261, Q71LX4, Q8CIB5, Q61233, P21107, P27546, P63005, P47757, E9Q447, Q8R1Q8, Q80UG5, P80315, O70400, P26231, P62908, Q9CQR4, P45591, Q61768, Q8BWB1, P14602, E9QK48, Q9JHU4, O88342, Q9WVE8	194	1113	19662	2.64076	0.00128594	8.5784e-05	7.29891e-05
GOTERM_CC_DIRECT	GO:0005813~centrosome	9	4.56853	0.0648006	P80315, Q922J3, B1AYJ9, E9Q8Q6, P0DP28, Q9JHU4, P63005, Q9QYB1, Q8R1Q8	194	435	19662	2.09691	1	0.329254	0.280145
GOTERM_CC_DIRECT	GO:0043025~neuronal cell body	11	5.58376	0.0384449	O55023, P53994, Q64669, Q6R0H7, Q9QUH0, Q9JMH6, P14206, P63005, P47757, Q9Z2M7, E9QA15	194	534	19662	2.08774	0.999991	0.210023	0.178698
GOTERM_CC_DIRECT	GO:0005737~cytoplasm	129	65.4822	1.27111e-20	P09405, Q922J3, Q64669, A0A0G2JFD8, O08709, Q9JMH6, P16858, Q9R0P5, Q71LX4, Q922B2, Q8VCM7, Q9Z1J3, Q61035, Q9QZ57, Q9Z2U1, P25444, P47757, Q9Z2U0, O70400, Q9D358, Q3U2G2, Q924M7, P14206, P14602, Q7TQI3, Q64433, Q06890, Q9Z2M7, O55023, Q9DCM0, P06151, O88844, Q9WTI7, Q9QUM9, O88685, Q6ZWX6, Q9JHU4, P60867, P60229, Q8R5L1, Q8CDN6, Q9WVE8, Q9D8W5, Q6R0H7, Q6PDN3, P97447, Q93092, P58281, P21107, P21…	194	6631	19662	1.97168	3.74978e-18	1.87489e-18	1.59524e-18
GOTERM_CC_DIRECT	GO:0005730~nucleolus	16	8.12183	0.0191729	P62908, P09405, Q9CZX8, B1AYJ9, Q9JMH6, Q62261, P14148, Q9Z1J3, Q9Z1Z0, Q6ZWN5, A0A0R4J1L2, P62141, Q9D8E6, Q9WTI7, Q8R5L1, P62852	194	842	19662	1.9259	0.99669	0.11312	0.0962481
GOTERM_CC_DIRECT	GO:0016020~membrane	89	45.1777	0.00254307	P09405, Q1XH17, Q922J3, O08709, Q8K3J1, Q8BG32, Q8K4L3, P97742, Q9D8Y0, P16858, Q71LX4, Q922B2, P04919, Q61233, P63001, Q8BLF1, P63323, P61982, P25444, P63005, P47757, Q922R8, Q8R1Q8, Q9D832, P26231, Q61768, Q9ES97, P19783, P14206, P70333, Q64433, Q06890, D9J302, Q3U422, P17047, P14131, P06151, Q9WTI7, P24369, P61358, O88685, Q6ZWX6, Q9JHU4, P60229, P60867, Q8R5L1, Q9WVE8, P51881, Q9D8W5, Q811U4,…	194	6998	19662	1.28897	0.528182	0.0202759	0.0172517
GOTERM_CC_DIRECT	GO:0005634~nucleus	75	38.0711	0.0129422	P09405, Q9Z1N5, Q9JMH6, Q8BG32, Q8K4L3, P16858, P17751, Q9Z1J3, Q8VDK1, P63001, Q9QZ57, Q9QUH0, Q9Z2U1, Q8BZA9, P25444, P63005, Q9Z2U0, Q64514, Q3U2G2, P56565, Q8BWB1, P19783, P14206, P14602, P70333, Q7TQI3, Q9CPR4, Q06890, Q9DCM0, P06151, Q9WTI7, P24369, P61358, Q9QUM9, O88685, Q6ZWX6, P60229, Q8R5L1, Q8CDN6, P51881, Q6R0H7, Q9R1P0, Q62261, Q8VDM4, P97447, Q9DBF1, Q8CIB5, Q93092, P67984, O35344,…	194	6019	19662	1.26288	0.978568	0.0795405	0.0676769

## Sheet: KEGG Cluster 3
category	term	count	%	p-value	protein IDs	list total	pop hits	pop total	fold enrichment	Bonferroni	Benjamini	FDR
KEGG_PATHWAY	mmu05132:Salmonella infection	7	8.97436	1.12227e-05	Q8VHX6, Q9CVB6, Q9JM76, P51150, Q8BTM8, P59999, P60710	52	78	7691	13.2734	0.00094227	0.000527195	0.000508367
KEGG_PATHWAY	mmu04141:Protein processing in endoplasmic reticulum	9	11.5385	1.25523e-05	Q01853, P27773, P23927, P07901, Q91W90, O54734, P08003, P09103, P08113	52	168	7691	7.92342	0.00105384	0.000527195	0.000508367
KEGG_PATHWAY	mmu05100:Bacterial invasion of epithelial cells	5	6.41026	0.00170471	Q9CVB6, P39054, Q9JM76, P59999, P60710	52	78	7691	9.48102	0.133521	0.0477318	0.0460271
KEGG_PATHWAY	mmu04510:Focal adhesion	6	7.69231	0.0115793	Q8VHX6, P57780, Q8BTM8, Q3THE2, P60710, P26039	52	207	7691	4.28707	0.624062	0.218149	0.210358
KEGG_PATHWAY	mmu04810:Regulation of actin cytoskeleton	6	7.69231	0.012985	Q9CVB6, Q9JM76, P57780, P59999, Q3THE2, P60710	52	213	7691	4.16631	0.666425	0.218149	0.210358
KEGG_PATHWAY	mmu04530:Tight junction	4	5.12821	0.021542	Q8VDD5, P57780, Q3THE2, P60710	52	90	7691	6.5735	0.839474	0.301588	0.290817
KEGG_PATHWAY	mmu03050:Proteasome	3	3.84615	0.0356043	Q9CX56, P46471, Q9R1P4	52	45	7691	9.86026	0.952418	0.427252	0.411993
KEGG_PATHWAY	mmu00480:Glutathione metabolism	3	3.84615	0.0512273	Q9DCD0, O09131, A0A1C7ZMZ5	52	55	7691	8.06748	0.987932	0.537887	0.518677
KEGG_PATHWAY	mmu04918:Thyroid hormone synthesis	3	3.84615	0.078292	P08003, P08113, A0A1C7ZMZ5	52	70	7691	6.33874	0.998939	0.730725	0.704628
KEGG_PATHWAY	mmu04144:Endocytosis	5	6.41026	0.0937935	Q9CVB6, P39054, Q9JM76, P51150, P59999	52	261	7691	2.83341	0.999745	0.746843	0.72017

## Sheet: GO CC Cluster 3
category	term	count	%	p-value	protein IDs	list total	pop hits	pop total	fold enrichment	Bonferroni	Benjamini	FDR
GOTERM_CC_DIRECT	GO:0009331~glycerol-3-phosphate dehydrogenase complex	2	2.5641	0.0117032	Q3ULJ0, P13707	78	3	19662	168.051	0.921354	0.0702192	0.0575407
GOTERM_CC_DIRECT	GO:0032432~actin filament bundle	3	3.84615	0.000535351	Q99K51, P23927, Q8BTM8	78	9	19662	84.0256	0.109228	0.00642421	0.00526428
GOTERM_CC_DIRECT	GO:0005885~Arp2/3 protein complex	3	3.84615	0.000813751	Q9CVB6, Q9JM76, P59999	78	11	19662	68.7483	0.161249	0.00878851	0.0072017
GOTERM_CC_DIRECT	GO:0034663~endoplasmic reticulum chaperone complex	3	3.84615	0.000974024	P08003, P09103, P08113	78	12	19662	63.0192	0.189814	0.0100185	0.00820963
GOTERM_CC_DIRECT	GO:0016460~myosin II complex	2	2.5641	0.0309088	Q8VDD5, Q3THE2	78	8	19662	63.0192	0.998866	0.151734	0.124338
GOTERM_CC_DIRECT	GO:0031143~pseudopodium	2	2.5641	0.0534698	A2AUC9, P57780	78	14	19662	36.011	0.999993	0.23099	0.189283
GOTERM_CC_DIRECT	GO:0031430~M band	3	3.84615	0.00332372	A2AUC9, P23927, Q3URD3	78	22	19662	34.3741	0.512818	0.0262548	0.0215144
GOTERM_CC_DIRECT	GO:0030863~cortical cytoskeleton	4	5.12821	0.000239866	Q8VDD5, P57780, Q8BTM8, P60710	78	31	19662	32.5261	0.0504977	0.0032382	0.00265352
GOTERM_CC_DIRECT	GO:0022624~proteasome accessory complex	2	2.5641	0.0645551	Q9CX56, P46471	78	17	19662	29.6561	0.999999	0.263092	0.21559
GOTERM_CC_DIRECT	GO:0043034~costamere	2	2.5641	0.071874	E9Q616, Q8BZF8	78	19	19662	26.5344	1	0.282269	0.231304
GOTERM_CC_DIRECT	GO:0097440~apical dendrite	2	2.5641	0.071874	Q9CVB6, Q8BTM8	78	19	19662	26.5344	1	0.282269	0.231304
GOTERM_CC_DIRECT	GO:0005790~smooth endoplasmic reticulum	3	3.84615	0.00573914	P27773, P08003, P08113	78	29	19662	26.0769	0.711548	0.0413218	0.0338609
GOTERM_CC_DIRECT	GO:0019013~viral nucleocapsid	2	2.5641	0.0827465	P61979, Q8VEK3	78	22	19662	22.9161	1	0.31115	0.25497
GOTERM_CC_DIRECT	GO:0001725~stress fiber	6	7.69231	6.4517e-06	Q8VDD5, P57780, P07356, Q8BZF8, Q3THE2, P60710	78	67	19662	22.5741	0.0013926	0.000116131	9.51625e-05
GOTERM_CC_DIRECT	GO:0001772~immunological synapse	3	3.84615	0.00783069	Q9DBC7, Q8VDD5, Q99PT1	78	34	19662	22.2421	0.816966	0.0497479	0.0407656
GOTERM_CC_DIRECT	GO:0042470~melanosome	8	10.2564	1.36999e-07	P27773, P07901, P08003, P09103, P18242, P08113, P07356, Q9D1D4	78	101	19662	19.9665	2.95913e-05	2.69016e-06	2.20443e-06
GOTERM_CC_DIRECT	GO:0030018~Z disc	9	11.5385	2.91369e-08	P23927, Q3URD3, Q8VHX6, P57780, P48036, Q4U4S6, B2RXQ9, Q8BZF8, Q3THE2	78	124	19662	18.2959	6.29355e-06	7.86697e-07	6.44654e-07
GOTERM_CC_DIRECT	GO:0030670~phagocytic vesicle membrane	3	3.84615	0.014603	P39054, P51150, O35639	78	47	19662	16.09	0.95831	0.0830064	0.0680191
GOTERM_CC_DIRECT	GO:0043209~myelin sheath	12	15.3846	2.20215e-10	Q01853, P27773, O08553, P23927, P07901, Q60864, Q04447, O09131, P17182, Q99P72, P60710, P05213	78	192	19662	15.7548	4.75664e-08	1.18916e-08	9.74451e-09
GOTERM_CC_DIRECT	GO:0000502~proteasome complex	4	5.12821	0.00221333	Q01853, Q9CX56, P46471, Q9R1P4	78	66	19662	15.2774	0.380355	0.0191232	0.0156704
GOTERM_CC_DIRECT	GO:0005811~lipid particle	4	5.12821	0.00221333	Q01853, Q9DCN2, P51150, P07356	78	66	19662	15.2774	0.380355	0.0191232	0.0156704
GOTERM_CC_DIRECT	GO:0005903~brush border	4	5.12821	0.00343091	Q8VDD5, P57780, Q8BTM8, Q3THE2	78	77	19662	13.0949	0.524007	0.0262548	0.0215144
GOTERM_CC_DIRECT	GO:0042383~sarcolemma	6	7.69231	0.000100073	Q3URD3, Q8VHX6, P48036, E9Q616, P07356, Q8BZF8	78	118	19662	12.8175	0.0213849	0.00154399	0.00126521
GOTERM_CC_DIRECT	GO:0005788~endoplasmic reticulum lumen	5	6.41026	0.000743247	P27773, Q91W90, P08003, P09103, P08113	78	104	19662	12.1191	0.148368	0.00844955	0.00692394
GOTERM_CC_DIRECT	GO:0031012~extracellular matrix	14	17.9487	1.11974e-10	Q61554, P07901, P61979, Q8BTM8, P18242, Q8VEK3, Q9QZZ6, Q8VDD5, P58252, P08113, Q9JK53, A2AJY2, P09103, P60843	78	294	19662	12.0037	2.41865e-08	8.06215e-09	6.60649e-09
GOTERM_CC_DIRECT	GO:0005925~focal adhesion	18	23.0769	1.39056e-13	P27773, Q8VHX6, P61979, P48036, Q8BTM8, P40124, Q8VDD5, Q9CVB6, P39054, Q9JM76, P57780, B2RXQ9, P08113, P09103, E9Q616, Q8BZF8, P60710, P26039	78	391	19662	11.6046	3.0048e-11	1.5018e-11	1.23064e-11
GOTERM_CC_DIRECT	GO:0001726~ruffle	4	5.12821	0.0061739	A2AUC9, Q8VDD5, P07356, P26039	78	95	19662	10.6138	0.737551	0.0430182	0.035251
GOTERM_CC_DIRECT	GO:0005604~basement membrane	4	5.12821	0.00653991	Q61554, A2AJY2, O09131, P07356	78	97	19662	10.3949	0.757623	0.0441444	0.0361739
GOTERM_CC_DIRECT	GO:0005913~cell-cell adherens junction	12	15.3846	4.03987e-08	Q9CWJ9, P61979, Q8VDD5, P58252, Q8BTM8, E9Q616, P17182, P07356, Q99P72, Q8BZF8, Q9WVA4, P26039	78	316	19662	9.57254	8.72608e-06	8.72611e-07	7.15057e-07
GOTERM_CC_DIRECT	GO:0032587~ruffle membrane	3	3.84615	0.0384179	P07901, P39054, P26039	78	79	19662	9.57254	0.999789	0.176559	0.14468
GOTERM_CC_DIRECT	GO:0072562~blood microparticle	5	6.41026	0.00184878	A0A0R4J0I1, Q61702, P06728, Q91WP6, P60710	78	133	19662	9.47658	0.329483	0.0173625	0.0142276
GOTERM_CC_DIRECT	GO:0043679~axon terminus	3	3.84615	0.0447885	P61979, Q9CVB6, P48036	78	86	19662	8.79338	0.99995	0.197435	0.161787
GOTERM_CC_DIRECT	GO:0015629~actin cytoskeleton	7	8.97436	0.000137386	Q8VHX6, Q8VDD5, Q9CVB6, P57780, Q8BTM8, E9Q616, P59999	78	201	19662	8.7788	0.0292413	0.00197836	0.00162115
GOTERM_CC_DIRECT	GO:0030426~growth cone	5	6.41026	0.00352495	O08553, Q9CVB6, P39054, Q9JM76, Q8BTM8	78	159	19662	7.92695	0.533611	0.0262548	0.0215144
GOTERM_CC_DIRECT	GO:0005938~cell cortex	4	5.12821	0.0189735	P61979, Q8VDD5, Q8BTM8, P07356	78	144	19662	7.00214	0.98404	0.0999581	0.0819101
GOTERM_CC_DIRECT	GO:0043234~protein complex	16	20.5128	1.75482e-08	Q9DBC7, P07901, Q60864, Q60854, P07309, Q8BTM8, Q99P72, Q3THE2, Q01853, O08553, Q8VDD5, P39054, P57780, O54734, P07356, P60710	78	628	19662	6.42234	3.7904e-06	5.41486e-07	4.43718e-07
GOTERM_CC_DIRECT	GO:0014069~postsynaptic density	6	7.69231	0.00246974	P23927, P61979, P39054, B2RXQ9, Q99P72, P60710	78	239	19662	6.32829	0.413817	0.0205178	0.0168132
GOTERM_CC_DIRECT	GO:0030496~midbody	3	3.84615	0.092177	P39054, P08113, P07356	78	130	19662	5.81716	1	0.337462	0.276531
GOTERM_CC_DIRECT	GO:0070062~extracellular exosome	60	76.9231	5.37235e-36	Q61554, P07901, P13707, P07309, Q8BTM8, P18242, Q9QZZ6, P40124, Q9DCN2, A0A0R4J0I1, O08553, Q9CVB6, Q9JM76, Q91W90, O88456, E9PZ00, P07356, P05213, P51150, Q9CX56, Q99PT1, Q99P72, P59999, Q3THE2, P39054, P57780, A2AJY2, P09103, O09131, Q9D1A2, O35639, Q9WVA4, A0A1C7ZMZ5, P27773, P48036, Q91WP6, Q9DCD0, Q9R1P4, Q9CWJ9, Q3ULJ0, P23927, Q8VDD5, G3X8R0, Q6ZWY9, Q9JK53, Q9D1D4, P26039, P60710, P61979,…	78	2674	19662	5.65618	1.16043e-33	1.16043e-33	9.50906e-34
GOTERM_CC_DIRECT	GO:0005911~cell-cell junction	4	5.12821	0.0443778	P57780, Q8BTM8, E9Q616, P07356	78	201	19662	5.01646	0.999945	0.197435	0.161787
GOTERM_CC_DIRECT	GO:0005578~proteinaceous extracellular matrix	5	6.41026	0.0354952	Q61554, A2AJY2, Q9JK53, P07356, Q9QZZ6	78	316	19662	3.98856	0.999593	0.170377	0.139614
GOTERM_CC_DIRECT	GO:0030529~intracellular ribonucleoprotein complex	5	6.41026	0.0369077	P61979, P58252, P57780, Q8VEK3, P60710	78	320	19662	3.9387	0.999703	0.173306	0.142014
GOTERM_CC_DIRECT	GO:0005615~extracellular space	23	29.4872	3.99593e-08	Q61554, P27773, P28665, Q3URD3, Q60854, P07309, P48036, P06728, Q91WP6, P18242, Q99PT1, Q9QZZ6, A0A0R4J0I1, P57780, Q9JK53, A2AJY2, E9PZ00, Q6ZWY9, P17182, P07356, Q00519, P60710, A0A1C7ZMZ5	78	1504	19662	3.8549	8.63117e-06	8.72611e-07	7.15057e-07
GOTERM_CC_DIRECT	GO:0045121~membrane raft	4	5.12821	0.0835496	P58252, P18242, E9Q616, P07356	78	262	19662	3.8485	1	0.31115	0.25497
GOTERM_CC_DIRECT	GO:0005829~cytosol	27	34.6154	1.59728e-09	P13707, P07901, Q60864, P48036, Q8BTM8, Q9R1P4, P40124, O08553, P23927, Q8VDD5, O88456, P07356, P60710, Q00519, P05213, P61979, Q9CX56, P51150, P06728, Q99PT1, Q01853, P39054, P58252, P08113, E9Q616, O09131, Q9D1A2	78	1784	19662	3.81507	3.45011e-07	6.90023e-08	5.65436e-08
GOTERM_CC_DIRECT	GO:0005856~cytoskeleton	16	20.5128	2.29952e-05	Q3URD3, Q8VHX6, Q8BTM8, P59999, A2AUC9, O08553, Q8VDD5, Q9CVB6, P39054, Q9JM76, P68368, B2RXQ9, Q8BZF8, P60710, P26039, P05213	78	1113	19662	3.62375	0.0049547	0.000382074	0.000313088
GOTERM_CC_DIRECT	GO:0043005~neuron projection	6	7.69231	0.0244858	O08553, P07901, Q9CVB6, P57780, P17182, Q99P72	78	420	19662	3.6011	0.995274	0.125927	0.10319
GOTERM_CC_DIRECT	GO:0042995~cell projection	10	12.8205	0.00182244	A2AUC9, P61979, Q9CVB6, P39054, Q9JM76, P48036, B2RXQ9, Q99P72, P59999, P26039	78	712	19662	3.54041	0.32565	0.0173625	0.0142276
GOTERM_CC_DIRECT	GO:0030424~axon	5	6.41026	0.0572846	O08553, P23927, O09131, O35639, P60710	78	370	19662	3.40644	0.999997	0.242617	0.198811
GOTERM_CC_DIRECT	GO:0043025~neuronal cell body	7	8.97436	0.0182389	O08553, P07901, P48036, Q8BTM8, B2RXQ9, Q99P72, O35639	78	534	19662	3.30438	0.981239	0.0999581	0.0819101
GOTERM_CC_DIRECT	GO:0009986~cell surface	8	10.2564	0.0115435	P27773, P23927, P07901, P06728, P08003, Q8VEK3, P07356, P26039	78	629	19662	3.20607	0.918562	0.0702192	0.0575407
GOTERM_CC_DIRECT	GO:0030054~cell junction	9	11.5385	0.00696658	P61979, Q9CVB6, P39054, P57780, Q4U4S6, B2RXQ9, P07356, Q8BZF8, P26039	78	718	19662	3.15974	0.779101	0.0455994	0.0373662
GOTERM_CC_DIRECT	GO:0048471~perinuclear region of cytoplasm	8	10.2564	0.0185979	Q01853, P07901, P39054, P57780, Q8BTM8, B2RXQ9, P08113, P07356	78	692	19662	2.91418	0.982664	0.0999581	0.0819101
GOTERM_CC_DIRECT	GO:0005576~extracellular region	18	23.0769	0.000364723	Q61554, P27773, P28665, P07309, Q61702, P06728, Q91WP6, P18242, Q9QZZ6, A0A0R4J0I1, P40124, P08113, Q9JK53, A2AJY2, E9PZ00, P07356, Q00519, A0A1C7ZMZ5	78	1753	19662	2.58835	0.0757701	0.00463412	0.00379741
GOTERM_CC_DIRECT	GO:0005789~endoplasmic reticulum membrane	7	8.97436	0.0595481	Q01853, Q9DCN2, A2AUC9, O54734, P08113, Q99P72, Q9D1D4	78	710	19662	2.48527	0.999998	0.247354	0.202693
GOTERM_CC_DIRECT	GO:0005783~endoplasmic reticulum	12	15.3846	0.0136753	Q01853, Q9DCN2, P27773, A2AUC9, P48036, Q91W90, O54734, P08003, P09103, P08113, Q99P72, Q9D1D4	78	1323	19662	2.28641	0.948914	0.079834	0.0654195
GOTERM_CC_DIRECT	GO:0005737~cytoplasm	52	66.6667	5.50078e-09	P07901, P13707, Q60864, P46471, Q8BTM8, P40124, Q9DCN2, O08553, Q9CVB6, Q9JM76, O88456, P07356, Q00519, P05213, Q99K51, Q9DBC7, P51150, Q99PT1, Q99P72, P59999, P39054, P57780, Q80XN0, O09131, Q9D1A2, O35639, P27773, P97443, P48036, Q9DCD0, Q9R1P4, Q8VEK3, Q3ULJ0, P23927, A2AUC9, Q8VDD5, Q6ZWY9, P26039, P60710, Q3URD3, Q8VHX6, P61979, Q60854, Q01853, P58252, P68368, Q04447, E9Q616, B2RXQ9, P17182,…	78	6631	19662	1.97678	1.18817e-06	1.98028e-07	1.62273e-07
GOTERM_CC_DIRECT	GO:0005886~plasma membrane	26	33.3333	0.0789546	P27773, P07901, P48036, Q8BTM8, P40124, Q3ULJ0, P23927, A2AUC9, Q8VDD5, Q9CVB6, O88456, P07356, Q9D1D4, P60710, P26039, Q9DBC7, Q3URD3, Q8VHX6, Q99P72, P39054, P58252, P08113, P09103, E9Q616, B2RXQ9, O35639	78	4874	19662	1.34469	1	0.304539	0.249553
GOTERM_CC_DIRECT	GO:0016020~membrane	37	47.4359	0.0283028	P07901, P48036, P46471, Q8BTM8, Q8VEK3, P40124, Q9CWJ9, Q9DCN2, Q3ULJ0, O08553, A2AUC9, Q8VDD5, Q9JM76, G3X8R0, O88456, P07356, Q9D1D4, P60710, P26039, Q9DBC7, Q3URD3, Q8VHX6, P61979, P51150, Q99PT1, Q99P72, P39054, P58252, Q80XN0, O54734, P08113, P09103, E9Q616, B2RXQ9, P17182, O35639, P60843	78	6998	19662	1.33279	0.997974	0.142172	0.116502

## Sheet: KEGG Cluster 4
category	term	count	%	p-value	protein IDs	list total	pop hits	pop total	fold enrichment	Bonferroni	Benjamini	FDR
KEGG_PATHWAY	mmu00640:Propanoate metabolism	14	8.48485	3.84272e-17	Q8BH95, Q99J39, Q9WUM5, Q9Z2I8, Q9EQ20, P16125, Q91ZA3, Q99MN9, P16332, Q9Z2I9, Q99NB1, P45952, Q8BMS1, Q8QZT1	124	27	7691	32.1607	4.99553e-15	5.55059e-16	4.48317e-16
KEGG_PATHWAY	mmu00020:Citrate cycle (TCA cycle)	14	8.48485	6.19071e-16	P28271, O08749, Q9WUM5, Q9Z2I8, P35486, P70404, Q8K2B3, P97807, Q9CQA3, Q9Z2I9, Q99KI0, Q9CZU6, P08249, P54071	124	32	7691	27.1356	8.65974e-14	8.04792e-15	6.50024e-15
KEGG_PATHWAY	mmu00280:Valine, leucine and isoleucine degradation	23	13.9394	3.59237e-26	Q61425, Q8BH95, Q3ULD5, Q99JY0, O08749, Q3U3J1, Q6P3A8, Q9JHI5, Q9EQ20, Q9DBL1, Q91ZA3, O35855, Q99MN9, P16332, P47738, Q99MR8, Q07417, Q8BWT1, Q99N15, P45952, Q8BMS1, Q9JLZ3, Q8QZT1	124	55	7691	25.9374	4.67008e-24	2.33504e-24	1.88599e-24
KEGG_PATHWAY	mmu01210:2-Oxocarboxylic acid metabolism	7	4.24242	3.38849e-07	O35855, Q99KI0, P28271, Q9CZU6, P54071, P70404, P05201	124	19	7691	22.851	4.40494e-05	2.93669e-06	2.37194e-06
KEGG_PATHWAY	mmu00630:Glyoxylate and dicarboxylate metabolism	9	5.45455	1.10308e-08	Q91ZA3, Q99MN9, P16332, Q99KI0, P28271, O08749, Q9CZU6, P08249, Q8QZT1	124	29	7691	19.2489	1.434e-06	1.02429e-07	8.27309e-08
KEGG_PATHWAY	mmu00071:Fatty acid degradation	14	8.48485	3.80071e-13	Q9WUR2, Q61425, Q8BH95, Q99JY0, P52825, P50544, Q9DBL1, P42125, P47738, Q07417, Q8BWT1, P45952, Q8BMS1, Q8QZT1	124	49	7691	17.7212	4.94038e-11	4.11744e-12	3.32562e-12
KEGG_PATHWAY	mmu01200:Carbon metabolism	27	16.3636	2.1699e-23	P26443, Q8BH95, O08749, Q9EQ20, P70404, Q8K2B3, Q91ZA3, Q99MN9, P97807, Q99NB1, P45952, P08249, P28271, P70695, Q9WUM5, Q9Z2I8, P35486, P16332, Q9CQA3, Q07417, Q9Z2I9, Q99KI0, Q9CZU6, Q8BMS1, P54071, Q8QZT1, P05201	124	116	7691	14.4367	2.82087e-21	5.64173e-22	4.55679e-22
KEGG_PATHWAY	mmu00062:Fatty acid elongation	6	3.63636	4.84622e-05	Q61425, Q8BH95, Q8BWT1, Q9QYR9, Q99JY0, Q8BMS1	124	26	7691	14.3133	0.00628043	0.000331583	0.000267817
KEGG_PATHWAY	mmu00650:Butanoate metabolism	6	3.63636	5.87197e-05	Q61425, Q07417, Q8BH95, Q8BWF0, Q8BMS1, Q8QZT1	124	27	7691	13.7832	0.00760473	0.000381678	0.000308279
KEGG_PATHWAY	mmu00190:Oxidative phosphorylation	30	18.1818	4.1598e-25	Q06185, Q8BK30, Q9ERS2, Q7TMF3, Q91WD5, Q9CPQ1, Q8K2B3, Q9CZ13, Q9DCX2, Q9CQH3, P56480, Q9D6J6, Q8R1I1, Q9DB77, Q91VR2, Q9DCT2, Q9CPP6, P97450, P03930, Q03265, Q91VM9, Q9CQZ5, Q9CQ54, Q9CXZ1, P19536, Q9CQC7, Q9DC69, Q91VD9, Q9CQA3, Q9DB20	124	139	7691	13.3865	5.40774e-23	1.35193e-23	1.09195e-23
KEGG_PATHWAY	mmu01212:Fatty acid metabolism	11	6.66667	5.56304e-09	Q9DBL1, Q61425, Q07417, Q8BH95, Q8BWT1, Q99JY0, P52825, P45952, Q8BMS1, Q8QZT1, P50544	124	51	7691	13.3778	7.23194e-07	5.56304e-08	4.49322e-08
KEGG_PATHWAY	mmu00620:Pyruvate metabolism	8	4.84848	2.26796e-06	P16125, P97807, P47738, O08749, Q99NB1, P35486, P08249, Q8QZT1	124	39	7691	12.7229	0.000294791	1.84272e-05	1.48835e-05
KEGG_PATHWAY	mmu05012:Parkinson's disease	29	17.5758	6.4851e-23	Q8BK30, Q9ERS2, Q7TMF3, Q91WD5, Q9CPQ1, Q8K2B3, Q9CZ13, Q9DCX2, Q9CQH3, P56480, Q9D6J6, Q8R1I1, Q9DB77, P62897, Q91VR2, Q9DCT2, Q9CPP6, P97450, P03930, Q03265, Q9CQZ5, Q9CQ54, Q9CXZ1, P19536, Q9CQC7, Q9DC69, Q91VD9, Q9CQA3, Q9DB20	124	149	7691	12.0718	8.43063e-21	1.20438e-21	9.72764e-22
KEGG_PATHWAY	mmu00410:beta-Alanine metabolism	6	3.63636	0.000159877	P47738, Q8BH95, Q99J39, P45952, Q8BMS1, Q9EQ20	124	33	7691	11.2771	0.0205711	0.000944727	0.000763049
KEGG_PATHWAY	mmu05010:Alzheimer's disease	31	18.7879	3.65097e-23	Q8BK30, Q9ERS2, Q7TMF3, Q91WD5, Q9CPQ1, Q8K2B3, Q99N15, Q9CZ13, Q9DCX2, Q9CQH3, P56480, Q9D6J6, Q8R1I1, Q9DB77, P62897, Q91VR2, Q9DCT2, Q9CPP6, P97450, P03930, Q03265, Q9CQZ5, Q9CQ54, Q9CXZ1, P19536, Q9CQC7, Q9DC69, Q91VD9, Q9CQA3, O55143, Q9DB20	124	177	7691	10.863	4.74626e-21	7.91043e-22	6.38919e-22
KEGG_PATHWAY	mmu01130:Biosynthesis of antibiotics	35	21.2121	2.5766e-25	Q8R1G2, Q8BH95, Q99JY0, O08749, Q3U3J1, P70404, Q8K2B3, Q9DCL9, P16125, Q91ZA3, Q99MN9, P97807, P47738, Q01768, Q8BWT1, Q99N15, Q99NB1, P45952, P08249, Q61425, P28271, P70695, Q6P3A8, Q9WUM5, Q9Z2I8, P35486, O35855, Q9CQA3, Q9Z2I9, Q99KI0, Q9CZU6, Q8BMS1, P54071, Q8QZT1, P05201	124	214	7691	10.1441	3.34957e-23	1.11652e-23	9.01809e-24
KEGG_PATHWAY	mmu05016:Huntington's disease	31	18.7879	1.08682e-21	Q8BK30, Q9ERS2, Q7TMF3, Q91WD5, Q9CPQ1, Q8K2B3, P09671, Q9CZ13, Q9DCX2, Q9CQH3, P56480, Q9D6J6, Q8R1I1, Q9DB77, P62897, Q91VR2, Q9DCT2, Q9CPP6, P97450, P08228, P03930, Q03265, Q9CQZ5, Q9CQ54, Q9CXZ1, P19536, Q9CQC7, Q9DC69, Q91VD9, Q9CQA3, Q9DB20	124	198	7691	9.71086	1.41287e-19	1.76609e-20	1.42646e-20
KEGG_PATHWAY	mmu00380:Tryptophan metabolism	7	4.24242	9.29908e-05	Q71RI9, Q61425, P47738, Q8BH95, Q8BW75, Q8BMS1, Q8QZT1	124	47	7691	9.23765	0.0120166	0.000575657	0.000464954
KEGG_PATHWAY	mmu04932:Non-alcoholic fatty liver disease (NAFLD)	22	13.3333	3.51707e-14	Q9CPP6, Q8BK30, Q9ERS2, Q7TMF3, Q9CQZ5, Q91WD5, Q9CPQ1, Q9CQ54, Q8K2B3, Q9CXZ1, P19536, Q9CQC7, Q9DC69, Q91VD9, Q9CQA3, Q9CZ13, Q9CQH3, Q9D6J6, Q8R1I1, Q9DB77, P62897, Q9DCT2	124	157	7691	8.69129	4.57523e-12	4.15654e-13	3.3572e-13
KEGG_PATHWAY	mmu00250:Alanine, aspartate and glutamate metabolism	5	3.0303	0.00273603	P26443, P28650, Q8BWF0, P05201, Q9JHW2	124	37	7691	8.38165	0.299647	0.0148202	0.0119701
KEGG_PATHWAY	mmu00360:Phenylalanine metabolism	3	1.81818	0.0515819	Q8BW75, P34884, P05201	124	23	7691	8.09011	0.998977	0.223522	0.180537
KEGG_PATHWAY	mmu04146:Peroxisome	10	6.06061	6.19855e-06	O35459, Q9WUR2, P08228, P09671, P99029, Q9DCM2, Q99J39, Q99LB2, P54071, P47934	124	83	7691	7.47279	0.000805489	4.74007e-05	3.82852e-05
KEGG_PATHWAY	mmu04260:Cardiac muscle contraction	9	5.45455	2.8483e-05	P19536, Q6PIE5, P09542, Q9CZ13, P19123, Q8R1I1, Q9DB77, Q9CPQ1, E9Q401	124	77	7691	7.24958	0.003696	0.000205711	0.000166151
KEGG_PATHWAY	mmu00310:Lysine degradation	5	3.0303	0.00933452	Q61425, P47738, Q8BH95, Q8BMS1, Q8QZT1	124	52	7691	5.96386	0.70453	0.044944	0.0363009
KEGG_PATHWAY	mmu01230:Biosynthesis of amino acids	7	4.24242	0.00129863	O35855, Q99KI0, P28271, Q9CZU6, P54071, P70404, P05201	124	76	7691	5.71275	0.155434	0.0073401	0.00592855
KEGG_PATHWAY	mmu00010:Glycolysis / Gluconeogenesis	6	3.63636	0.00395737	P16125, P47738, O08749, P70695, Q99NB1, P35486	124	66	7691	5.63856	0.402786	0.0205783	0.016621
KEGG_PATHWAY	mmu05410:Hypertrophic cardiomyopathy (HCM)	6	3.63636	0.00847022	Q61738, P09542, P31001, P19123, A2ASS6, E9Q401	124	79	7691	4.7107	0.66906	0.0423511	0.0342066
KEGG_PATHWAY	mmu05412:Arrhythmogenic right ventricular cardiomyopathy (ARVC)	5	3.0303	0.022027	Q65CL1, Q61738, P31001, E9Q557, E9Q401	124	67	7691	4.62867	0.94473	0.0987417	0.0797529
KEGG_PATHWAY	mmu05414:Dilated cardiomyopathy	6	3.63636	0.0103765	Q61738, P09542, P31001, P19123, A2ASS6, E9Q401	124	83	7691	4.48368	0.742308	0.0481766	0.0389118
KEGG_PATHWAY	mmu01100:Metabolic pathways	84	50.9091	4.75676e-37	Q06185, Q8BK30, Q8BH95, Q99JY0, O08749, Q3U3J1, Q8BVI4, Q7TMF3, Q9EQ20, Q9DBL1, Q99MN9, Q01768, Q99MR8, Q91UZ5, Q8BWT1, Q8BW75, Q9CZ13, Q9CQH3, P56480, P08249, Q9DB77, Q9JLZ3, Q8R1I1, F8VPN4, P28650, P70695, Q03265, Q99J39, Q8BWF0, Q9Z2I8, P35486, Q9JHI5, Q9CXZ1, P50544, P19536, Q9CQC7, Q07417, Q9Z2I9, Q99KI0, Q9CZU6, Q8BMS1, P54071, Q8QZT1, Q9DB20, Q71RI9, P26443, Q8R1G2, Q8BKZ9, Q9ERS2, Q99KQ4,…	124	1269	7691	4.10562	6.18379e-35	6.18379e-35	4.9946e-35

## Sheet: GO CC Cluster 4
category	term	count	%	p-value	protein IDs	list total	pop hits	pop total	fold enrichment	Bonferroni	Benjamini	FDR
GOTERM_CC_DIRECT	GO:0005739~mitochondrion	116	70.303	1.81735e-84	P09528, Q9WUR2, Q8BH95, Q3U3J1, Q9R112, Q9DBL1, O35129, Q01768, Q99MR8, Q8BW75, Q14BI5, P56480, Q9DCV4, Q8BH86, Q99J39, Q03265, Q8BWF0, P35486, Q9CXZ1, P50544, Q9CQC7, P67778, Q2TPA8, Q9DCM2, Q91YY4, Q9CZU6, Q8BMS1, P54071, Q9DB20, Q71RI9, Q91WD5, Q99M87, Q9CPQ1, Q8K2B3, Q91ZA3, P47738, Q99N15, Q99NB1, P45952, Q9D6J6, P62897, Q91VR2, Q9DCT2, Q9CPP6, P97450, Q61425, P03930, Q3ULD5, P28271, Q9CQZ5,…	163	1721	19662	8.1305	3.45296e-82	3.45296e-82	2.9441e-82
GOTERM_CC_DIRECT	GO:0005743~mitochondrial inner membrane	56	33.9394	3.61709e-53	Q06185, Q8BK30, Q99JY0, Q9R112, Q7TMF3, O35129, Q99MR8, Q8BWT1, Q8BW75, Q9CRB8, Q9CZ13, Q9DCZ4, Q9CQH3, P56480, P08249, Q9DB77, Q8R1I1, Q03265, Q9CXZ1, P50544, P19536, Q9CQC7, P67778, Q9DCM2, Q8BMS1, P54071, Q8QZT1, Q9DB20, P26443, Q9ERS2, Q91WD5, Q9CPQ1, Q8K2B3, P42125, P09671, Q99N15, Q9DCX2, Q9D6J6, P47934, Q91VR2, Q9DCT2, Q9CPP6, P97450, Q9CQN1, Q61425, P52825, Q6P3A8, Q9WUM5, Q9CQZ5, Q9CQ54,…	163	387	19662	17.4549	6.87246e-51	3.43623e-51	2.92984e-51
GOTERM_CC_DIRECT	GO:0005759~mitochondrial matrix	31	18.7879	3.28337e-30	P26443, Q8BKZ9, Q8BH95, O08749, Q99M87, Q9DBL1, Q91ZA3, Q99MN9, P42125, P47738, Q99MR8, Q8BWT1, Q9QYR9, Q99NB1, P45952, P08249, Q9CQN1, Q61425, Q3ULD5, Q99J39, Q9WUM5, P35486, Q9JHI5, Q9DC69, P16332, Q07417, Q9DCM2, Q9CZU6, P63038, Q8QZT1, Q9DCW4	163	188	19662	19.8904	6.2384e-28	2.07947e-28	1.77302e-28
GOTERM_CC_DIRECT	GO:0043209~myelin sheath	29	17.5758	4.33039e-27	O08749, P34884, Q8K2B3, P16125, Q01768, P09671, Q6PIE5, Q9CZ13, Q9DCX2, P56480, Q9D6J6, P08249, Q9DB77, P62897, Q91VR2, Q9DCT2, P10649, P08228, Q03265, P35486, P19536, P67778, Q91VD9, Q9WVK4, Q8VEM8, Q9Z2I9, Q99KI0, P63038, Q9DB20	163	192	19662	18.2195	8.22775e-25	2.05694e-25	1.75381e-25
GOTERM_CC_DIRECT	GO:0070062~extracellular exosome	70	42.4242	7.90461e-20	P09528, P04117, Q8BH95, Q99JY0, P34884, Q8BVI4, Q9EQ20, Q9DBL1, O35129, Q01768, Q8BWT1, Q8BW75, P56480, P08249, Q9DB77, Q8R1I1, Q60675, P70695, Q03265, P18572, P31001, P46935, Q9CQC7, P67778, Q9Z2I9, Q9DCM2, Q9CZU6, E9Q557, P54071, Q8QZT1, Q9DB20, Q8R1G2, P99029, Q9ERS2, Q9CQ62, Q99KQ4, A2ASS6, Q9DCL9, P16125, P97807, P42125, P47738, P09671, Q9QYR9, P02469, Q9DCX2, F6RER8, P45952, Q99LB2, Q91VR2,…	163	2674	19662	3.15774	1.50188e-17	3.00375e-18	2.56109e-18
GOTERM_CC_DIRECT	GO:0070469~respiratory chain	16	9.69697	6.07396e-19	Q9CPP6, Q8BK30, Q7TMF3, Q9CQZ5, Q91WD5, Q9CQ54, Q9CXZ1, Q9DC69, Q91VD9, Q9CZ13, Q9CQH3, Q9D6J6, Q8R1I1, Q9DB77, P62897, Q9DCT2	163	58	19662	33.2761	1.15405e-16	1.92342e-17	1.63997e-17
GOTERM_CC_DIRECT	GO:0005747~mitochondrial respiratory chain complex I	14	8.48485	5.36151e-17	Q9CPP6, Q8BK30, Q9ERS2, Q7TMF3, Q9CQZ5, Q91WD5, Q9CQ54, Q9CXZ1, Q9CQC7, Q9DC69, Q91VD9, Q9CQH3, Q9D6J6, Q9DCT2	163	47	19662	35.9311	1.01869e-14	1.45527e-15	1.24081e-15
GOTERM_CC_DIRECT	GO:0005753~mitochondrial proton-transporting ATP synthase complex	8	4.84848	6.67262e-11	P97450, Q06185, P03930, Q03265, Q9DCX2, P56480, Q91VR2, Q9DB20	163	18	19662	53.6115	1.2678e-08	1.58475e-09	1.35121e-09
GOTERM_CC_DIRECT	GO:0005777~peroxisome	12	7.27273	1.14386e-08	O35459, Q8BGC4, Q9WUR2, P08228, Q2TPA8, Q8K1M6, P99029, Q9DCM2, Q99J39, Q99LB2, P54071, P47934	163	131	19662	11.0497	2.17333e-06	2.41482e-07	2.05895e-07
GOTERM_CC_DIRECT	GO:0031966~mitochondrial membrane	9	5.45455	1.88506e-06	Q9DC69, Q01768, Q07417, Q9ERS2, Q9CQZ5, P45952, Q9JHI5, P56480, Q9DCT2	163	101	19662	10.7488	0.000358097	3.58161e-05	3.05379e-05
GOTERM_CC_DIRECT	GO:0000276~mitochondrial proton-transporting ATP synthase complex, coupling factor F(o)	5	3.0303	2.08781e-06	P97450, Q06185, P03930, Q9DCX2, Q9DB20	163	12	19662	50.2607	0.000396606	3.60622e-05	3.07477e-05
GOTERM_CC_DIRECT	GO:0042645~mitochondrial nucleoid	6	3.63636	3.724e-05	P09671, Q99JY0, Q99N15, P56480, Q8BMS1, P50544	163	46	19662	15.7338	0.00705075	0.000589633	0.000502739
GOTERM_CC_DIRECT	GO:0030018~Z disc	8	4.84848	7.60125e-05	Q5DTJ9, S4R2R5, Q9JKS4, B7ZCI2, P70695, P31001, A2ASS6, E9Q401	163	124	19662	7.78231	0.0143391	0.00111095	0.000947233
GOTERM_CC_DIRECT	GO:0045263~proton-transporting ATP synthase complex, coupling factor F(o)	4	2.42424	0.000114372	P97450, Q06185, P03930, Q9DCX2	163	12	19662	40.2086	0.0214975	0.00155219	0.00132345
GOTERM_CC_DIRECT	GO:0031012~extracellular matrix	11	6.66667	0.000168039	Q9DCT8, P08228, F8VQJ3, Q03265, P02469, P62301, P63038, P56480, Q8BMS1, E9Q557, Q9DB20	163	294	19662	4.51321	0.0314258	0.0021285	0.00181482
GOTERM_CC_DIRECT	GO:0005782~peroxisomal matrix	4	2.42424	0.000342964	Q9WUR2, P99029, Q99J39, P63038	163	17	19662	28.3825	0.0630958	0.00407269	0.00347251
GOTERM_CC_DIRECT	GO:0042383~sarcolemma	7	4.24242	0.000439337	Q60675, S4R2R5, Q61738, Q6PIE5, P18572, P31001, E9Q401	163	118	19662	7.15577	0.0801019	0.00491024	0.00418662
GOTERM_CC_DIRECT	GO:0000275~mitochondrial proton-transporting ATP synthase complex, catalytic core F(1)	3	1.81818	0.00066378	Q03265, P56480, Q91VR2	163	5	19662	72.3755	0.118526	0.0066378	0.0056596
GOTERM_CC_DIRECT	GO:0045261~proton-transporting ATP synthase complex, catalytic core F(1)	3	1.81818	0.00066378	Q03265, P56480, Q91VR2	163	5	19662	72.3755	0.118526	0.0066378	0.0056596
GOTERM_CC_DIRECT	GO:0031672~A band	4	2.42424	0.00110526	S4R2R5, P09542, A2ASS6, E9Q401	163	25	19662	19.3001	0.18951	0.0105	0.00895263
GOTERM_CC_DIRECT	GO:0045254~pyruvate dehydrogenase complex	3	1.81818	0.00182857	Q8BKZ9, O08749, P35486	163	8	19662	45.2347	0.293722	0.0165442	0.0141061
GOTERM_CC_DIRECT	GO:0005750~mitochondrial respiratory chain complex III	3	1.81818	0.00290711	Q9CZ13, Q8R1I1, Q9DB77	163	10	19662	36.1877	0.424868	0.0251068	0.0214069
GOTERM_CC_DIRECT	GO:0005916~fascia adherens	3	1.81818	0.00495789	Q65CL1, P31001, E9Q557	163	13	19662	27.8367	0.611064	0.0409565	0.0349208
GOTERM_CC_DIRECT	GO:0014704~intercalated disc	4	2.42424	0.00856085	S4R2R5, Q6PIE5, P31001, E9Q557	163	51	19662	9.46084	0.804767	0.0677734	0.0577857
GOTERM_CC_DIRECT	GO:0005605~basal lamina	3	1.81818	0.0105232	Q60675, F8VQJ3, P02469	163	19	19662	19.0462	0.866011	0.0799761	0.0681901
GOTERM_CC_DIRECT	GO:0031430~M band	3	1.81818	0.0139881	S4R2R5, Q14BI5, A2ASS6	163	22	19662	16.449	0.931196	0.0981739	0.0837062
GOTERM_CC_DIRECT	GO:0045244~succinate-CoA ligase complex (GDP-forming)	2	1.21212	0.016411	Q9WUM5, Q9Z2I8	163	2	19662	120.626	0.956888	0.0981739	0.0837062
GOTERM_CC_DIRECT	GO:0016507~mitochondrial fatty acid beta-oxidation multienzyme complex	2	1.21212	0.016411	Q99JY0, Q8BMS1	163	2	19662	120.626	0.956888	0.0981739	0.0837062
GOTERM_CC_DIRECT	GO:0045271~respiratory chain complex I	2	1.21212	0.016411	Q9CPP6, Q9CXZ1	163	2	19662	120.626	0.956888	0.0981739	0.0837062
GOTERM_CC_DIRECT	GO:0002169~3-methylcrotonyl-CoA carboxylase complex, mitochondrial	2	1.21212	0.016411	Q99MR8, Q3ULD5	163	2	19662	120.626	0.956888	0.0981739	0.0837062
GOTERM_CC_DIRECT	GO:1905202~methylcrotonoyl-CoA carboxylase complex	2	1.21212	0.016411	Q99MR8, Q3ULD5	163	2	19662	120.626	0.956888	0.0981739	0.0837062
GOTERM_CC_DIRECT	GO:0031674~I band	3	1.81818	0.0165346	Q5DTJ9, P09542, A2ASS6	163	24	19662	15.0782	0.957905	0.0981739	0.0837062
GOTERM_CC_DIRECT	GO:0005758~mitochondrial intermembrane space	4	2.42424	0.0240678	Q91VD9, Q9CQN1, P08228, P62897	163	75	19662	6.43337	0.990234	0.129389	0.110321
GOTERM_CC_DIRECT	GO:0005606~laminin-1 complex	2	1.21212	0.0245159	F8VQJ3, P02469	163	3	19662	80.4172	0.99105	0.129389	0.110321
GOTERM_CC_DIRECT	GO:0043259~laminin-10 complex	2	1.21212	0.0245159	F8VQJ3, P02469	163	3	19662	80.4172	0.99105	0.129389	0.110321
GOTERM_CC_DIRECT	GO:0005947~mitochondrial alpha-ketoglutarate dehydrogenase complex	2	1.21212	0.0245159	Q3U3J1, Q6P3A8	163	3	19662	80.4172	0.99105	0.129389	0.110321
GOTERM_CC_DIRECT	GO:0005749~mitochondrial respiratory chain complex II, succinate dehydrogenase complex (ubiquinone)	2	1.21212	0.0325543	Q9CQA3, Q8K2B3	163	4	19662	60.3129	0.998142	0.167171	0.142535
GOTERM_CC_DIRECT	GO:0030017~sarcomere	3	1.81818	0.0372227	A2ASS6, P49813, E9Q401	163	37	19662	9.78047	0.999259	0.186113	0.158686
GOTERM_CC_DIRECT	GO:0005654~nucleoplasm	24	14.5455	0.0465497	Q8BK30, Q9CQN1, P08228, Q9WUR2, Q61425, P04117, P52825, O08749, Q9ERS2, Q9CQ62, P34884, P19123, Q99KQ4, Q9JHI5, Q91WD5, Q9EQ20, Q9CQC7, P67778, Q9DC69, Q9CQA3, Q9DCX2, Q9CQH3, P08249, Q9DB77	163	1935	19662	1.49613	0.999883	0.221945	0.189237
GOTERM_CC_DIRECT	GO:0043231~intracellular membrane-bounded organelle	12	7.27273	0.0467252	Q9WUR2, Q8K1M6, P99029, Q9DCM2, P28271, Q6PIE5, P35486, P63038, Q99LB2, Q99M87, Q9DBG5, Q9DCW4	163	751	19662	1.92744	0.999887	0.221945	0.189237
GOTERM_CC_DIRECT	GO:0061617~MICOS complex	2	1.21212	0.0484343	Q78IK4, Q9DCZ4	163	6	19662	40.2086	0.99992	0.224452	0.191375
GOTERM_CC_DIRECT	GO:0048471~perinuclear region of cytoplasm	11	6.66667	0.060673	P46935, S4R2R5, O55143, Q01768, Q9JKS4, Q9WVK4, Q8K1M6, P99029, P10630, Q9D1G3, P02469	163	692	19662	1.91746	0.999993	0.274473	0.234024
GOTERM_CC_DIRECT	GO:0016529~sarcoplasmic reticulum	3	1.81818	0.0826938	F8VPN4, O55143, E9Q401	163	58	19662	6.23926	1	0.365391	0.311544
GOTERM_CC_DIRECT	GO:0030061~mitochondrial crista	2	1.21212	0.08701	P67778, P63038	163	11	19662	21.932	1	0.375725	0.320355
GOTERM_CC_DIRECT	GO:0005829~cytosol	21	12.7273	0.0972854	Q8R1G2, P08228, P04117, Q8CGY6, Q8K1M6, P99029, P28271, P70695, Q99J39, Q8BVI4, Q99KQ4, Q99M87, Q9DCL9, P46935, P97807, Q63918, P63038, Q11011, P54071, P62897, P05201	163	1784	19662	1.41992	1	0.399996	0.341049
GOTERM_CC_DIRECT	GO:0031594~neuromuscular junction	3	1.81818	0.0977394	Q61738, P31001, Q99M87	163	64	19662	5.65433	1	0.399996	0.341049
GOTERM_CC_DIRECT	GO:0016020~membrane	67	40.6061	0.0989464	Q06185, Q8BK30, Q9WUR2, Q99JY0, Q7TMF3, O35129, Q99MR9, Q8BW75, Q9CRB8, Q6PIE5, Q9CZ13, Q9DCZ4, Q9CQH3, Q9CYT6, P56480, P08249, Q9DB77, Q8R1I1, P49813, S4R2R5, P28650, Q8K1M6, Q03265, P18572, P31001, Q9CXZ1, Q9DBG5, P50544, P46935, P67778, O55143, Q2TPA8, Q9DCM2, E9Q557, Q9DB20, Q91WD5, Q99M87, Q9CPQ1, Q8K2B3, Q9DCL9, P16125, Q61738, Q9DCX2, F6RER8, Q63918, Q9D6J6, P47934, Q91VR2, Q9DCT2, E9Q401,…	163	6998	19662	1.15489	1	0.399996	0.341049

## Sheet: KEGG Cluster 5
category	term	count	%	p-value	protein IDs	list total	pop hits	pop total	fold enrichment	Bonferroni	Benjamini	FDR
KEGG_PATHWAY	mmu00130:Ubiquinone and other terpenoid-quinone biosynthesis	3	2.9703	0.00368289	Q8R1S0, Q9CXI0, Q8BMS4	66	11	7691	31.781	0.340936	0.0344417	0.031089
KEGG_PATHWAY	mmu00020:Citrate cycle (TCA cycle)	5	4.9505	0.000139888	Q60597, Q9D6R2, Q9CZB0, Q9D051, Q8BMF4	66	32	7691	18.2079	0.0156841	0.00175637	0.00158539
KEGG_PATHWAY	mmu00030:Pentose phosphate pathway	3	2.9703	0.0262789	P05064, Q9CQ60, Q9D0F9	66	30	7691	11.653	0.95067	0.185595	0.167528
KEGG_PATHWAY	mmu01200:Carbon metabolism	11	10.8911	3.67508e-08	Q60597, Q9D6R2, P28474, Q9CZB0, Q9R0P3, Q8CHP8, P05064, O70250, Q9D051, Q9CQ60, Q8BMF4	66	116	7691	11.0503	4.15284e-06	1.03821e-06	9.37147e-07
KEGG_PATHWAY	mmu00010:Glycolysis / Gluconeogenesis	6	5.94059	0.000221575	P28474, P05064, O70250, Q9D051, Q8BMF4, Q9D0F9	66	66	7691	10.5937	0.0247298	0.00244382	0.00220593
KEGG_PATHWAY	mmu05412:Arrhythmogenic right ventricular cardiomyopathy (ARVC)	6	5.94059	0.000237894	O55111, P23242, Q02257, Q02248, P15116, P11531	66	67	7691	10.4355	0.0265271	0.00244382	0.00220593
KEGG_PATHWAY	mmu05012:Parkinson's disease	12	11.8812	3.63508e-08	Q99LX0, Q9CZB0, P99028, Q9D855, P00405, Q9DCJ5, Q99LC3, Q99LY9, P52503, Q9CQ75, Q02053, Q9CQJ8	66	149	7691	9.38499	4.10763e-06	1.03821e-06	9.37147e-07
KEGG_PATHWAY	mmu00190:Oxidative phosphorylation	11	10.8911	2.06296e-07	Q9CZB0, P99028, Q9CPQ8, Q9D855, P00405, Q9DCJ5, Q99LC3, Q99LY9, P52503, Q9CQ75, Q9CQJ8	66	139	7691	9.22182	2.33111e-05	4.66228e-06	4.20843e-06
KEGG_PATHWAY	mmu01130:Biosynthesis of antibiotics	14	13.8614	1.90715e-08	Q60597, Q9D6R2, P28474, O70250, Q9WUR9, Q9D051, Q9CQ60, Q8BMF4, Q9CZB0, Q8CHP8, P05064, Q6XPS7, P29758, Q9D0F9	66	214	7691	7.62348	2.15508e-06	1.03821e-06	9.37147e-07
KEGG_PATHWAY	mmu04260:Cardiac muscle contraction	5	4.9505	0.00396232	Q02566, P99028, Q9D855, P00405, P48787	66	77	7691	7.5669	0.361499	0.0344417	0.031089
KEGG_PATHWAY	mmu04932:Non-alcoholic fatty liver disease (NAFLD)	10	9.90099	5.88828e-06	Q9CZB0, P99028, Q9D855, P00405, Q9DCJ5, Q99LC3, Q99LY9, P52503, Q9CQ75, Q9CQJ8	66	157	7691	7.42231	0.000665156	0.000110896	0.000100101
KEGG_PATHWAY	mmu00980:Metabolism of xenobiotics by cytochrome P450	4	3.9604	0.0166428	P24472, P28474, P15626, P48758	66	64	7691	7.28314	0.849901	0.134331	0.121255
KEGG_PATHWAY	mmu05010:Alzheimer's disease	10	9.90099	1.55857e-05	Q9CZB0, P99028, Q9D855, P00405, Q9DCJ5, Q99LC3, Q99LY9, P52503, Q9CQ75, Q9CQJ8	66	177	7691	6.58363	0.00175965	0.000251597	0.000227106
KEGG_PATHWAY	mmu00480:Glutathione metabolism	3	2.9703	0.0784929	P24472, P47791, P15626	66	55	7691	6.3562	0.999903	0.466826	0.421383
KEGG_PATHWAY	mmu01230:Biosynthesis of amino acids	4	3.9604	0.0261512	Q9D6R2, P05064, O70250, Q6XPS7	66	76	7691	6.13317	0.949934	0.185595	0.167528
KEGG_PATHWAY	mmu05016:Huntington's disease	10	9.90099	3.80292e-05	Q9CZB0, P99028, Q9D855, P00405, Q9DCJ5, Q99LC3, Q99LY9, P52503, Q9CQ75, Q9CQJ8	66	198	7691	5.88537	0.00428816	0.000537162	0.000484872
KEGG_PATHWAY	mmu05204:Chemical carcinogenesis	4	3.9604	0.042504	P24472, P28474, P15626, P48758	66	92	7691	5.06653	0.992613	0.282527	0.255024
KEGG_PATHWAY	mmu04922:Glucagon signaling pathway	4	3.9604	0.0522154	O70250, E9Q1W0, Q9D051, Q9Z1E4	66	100	7691	4.66121	0.997666	0.327797	0.295887
KEGG_PATHWAY	mmu01100:Metabolic pathways	33	32.6733	8.61674e-10	P50171, P99028, Q9CPQ8, O70250, Q9DCJ5, Q9WUR9, Q9CQ60, Q99LY9, Q64105, Q9DBP5, Q8R1S0, Q8CGC7, Q9CZB0, P00405, Q6XPS7, Q9D0F9, Q9CQJ8, Q60597, Q9D6R2, P35505, P28474, Q9D855, Q9D051, Q8BMF4, P52503, Q9CQ75, Q8CHP8, P05064, P29758, P48758, Q99LC3, Q8BMS4, Q9CXI0	66	1269	7691	3.03034	9.73691e-08	9.73691e-08	8.78907e-08

[truncated: 3 more sheets: GO CC Cluster 5, KEGG Cluster 6, GO CC Cluster 6]
