# Supplementary material for: Desmin Knock-Out Cardiomyopathy: A Heart on the Verge of Metabolic Crisis
Source: Int J Mol Sci. 2022 Oct 10;23(19):12020. doi: 10.3390/ijms231912020 (PMC9570457; doi:10.3390/ijms231912020)
Supplement: Supplementary file 1 [file ijms-23-12020-s001.zip › 2022-09-28_DesKO-Mito_Table-S2_v3.xlsx]

## Sheet: table caption
Supplementary Table S2. Lists of significantly up- and downregulated proteins in desmin knock-out left ventricular cardiac tissue as well as a third list of all quantified proteins including non-significantly regulated and proteins of any fold-change.

## Sheet: significant up in hom
protein IDs	majority protein IDs	protein names	gene names	p-value	Student's t-test q-value hom_wt	hom/wt
P46471;Q8BVQ9	P46471;Q8BVQ9	26S protease regulatory subunit 7	Psmc2	0.00179659	0.0343342	1.35811
P62196;Q8K1K2	P62196;Q8K1K2	26S protease regulatory subunit 8	Psmc5	0.00399621	0.0458315	4.44328		p- and q-values
Q8VDM4;E9Q2S8;A0A338P6M5	Q8VDM4	26S proteasome non-ATPase regulatory subunit 2	Psmd2	0.0231931	0.119047	1.57427		≤ 0.001	to	0.05
P19253;A0A1B0GQW6;A0A1B0GSF0;A0A1B0GSB2;A0A1B0GSQ6;A0A1B0GTA1;A0A1B0GS68;A0A1B0GSL5;A0A1B0GSC2;A0A1B0GRH1	P19253;A0A1B0GQW6;A0A1B0GSF0;A0A1B0GSB2;A0A1B0GSQ6;A0A1B0GTA1;A0A1B0GS68	60S ribosomal protein L13a	Rpl13a	0.00742127	0.0609328	5.94451
P60710;P63260;E9Q5F4;E9Q1F2;G3UZ07;G3UYG0;E9Q606;B1ATY1;F8WGM8	P60710;P63260;E9Q5F4;E9Q1F2;G3UZ07;G3UYG0;E9Q606;B1ATY1	Actin, cytoplasmic 1;Actin, cytoplasmic 1, N-terminally processed;Actin, cytoplasmic 2;Actin, cytoplasmic 2, N-terminally processed	Actb;Actg1	0.00180022	0.0343342	2.35839		ratio hom/wt
P61161	P61161	Actin-related protein 2	Actr2	0.0256977	0.129193	2.8919		1.1	to	≥ 2.0
Q9CVB6;D3YXG6	Q9CVB6;D3YXG6	Actin-related protein 2/3 complex subunit 2	Arpc2	0.0175692	0.103998	1.46393
P59999;Q3TX55;E9PWA7	P59999;Q3TX55;E9PWA7	Actin-related protein 2/3 complex subunit 4	Arpc4	0.0195782	0.107274	1.25014
P40124;B1ARS0	P40124	Adenylyl cyclase-associated protein 1	Cap1	0.0215292	0.11221	1.86028
Q00896;A0A0R4J0X5;P07758;A0A0A0MQA3;D3YZL0	Q00896;A0A0R4J0X5;P07758;A0A0A0MQA3	Alpha-1-antitrypsin 1-3;Alpha-1-antitrypsin 1-1	Serpina1c;Serpina1a	0.00189304	0.0343342	1.54449
Q7TPR4;A1BN54	Q7TPR4;A1BN54	Alpha-actinin-1	Actn1	0.0172075	0.102685	4.85113
P57780;A0A1L1SV25;E9Q2W9;A0A1L1SVJ6;D3Z761;D3Z0L8	P57780;A0A1L1SV25;E9Q2W9	Alpha-actinin-4	Actn4	0.0274163	0.136895	1.31179
P10107;A0A494BBD8	P10107;A0A494BBD8	Annexin A1	Anxa1	0.00191785	0.0343342	8.02608
P07356;B0V2N7;B0V2N8;B0V2N5	P07356;B0V2N7;B0V2N8;B0V2N5	Annexin A2;Annexin	Anxa2	0.000217181	0.00983874	1.9193
O35639;Q3TET3;A0A0G2JDV9;A0A0G2JGL7	O35639;Q3TET3	Annexin A3;Annexin	Anxa3	0.048367	0.184903	1.18489
P48036;A0A0G2JGQ0	P48036;A0A0G2JGQ0	Annexin A5	Anxa5	0.00546606	0.0497056	1.44359
Q00623;A0A1L1STX7;CON__P15497	Q00623	Apolipoprotein A-I;Proapolipoprotein A-I;Truncated apolipoprotein A-I	Apoa1	0.00514076	0.0497056	1.42366
P06728	P06728	Apolipoprotein A-IV	Apoa4	0.00124824	0.027764	1.41737
Q01339	Q01339	Beta-2-glycoprotein 1	Apoh	0.00121738	0.027764	1.40706
Q9DBC7;P12849;D3Z068;D3Z0V6;D3Z4L4;A2AI69;D3YTM5	Q9DBC7	cAMP-dependent protein kinase type I-alpha regulatory subunit;cAMP-dependent protein kinase type I-alpha regulatory subunit, N-terminally processed	Prkar1a	0.0163828	0.0993798	1.29688
P23953;D3Z5G7;A0A1D5RM42;Q8VCC2;Q64176;Q91WU0;H3BL34;D3Z298	P23953	Carboxylesterase 1C	Ces1c	0.00435134	0.0469776	1.47778
P18242;F8WIR1;F6Y6L6;A0A1B0GT66	P18242;F8WIR1;F6Y6L6;A0A1B0GT66	Cathepsin D	Ctsd	0.0297246	0.142604	1.22408
Q68FD5;Q5SXR6;F6Z1R4	Q68FD5;Q5SXR6	Clathrin heavy chain 1;Clathrin heavy chain	Cltc	0.00447436	0.0475968	1.59902
Q8CIE6;F8WHL2	Q8CIE6;F8WHL2	Coatomer subunit alpha;Xenin;Proxenin;Coatomer subunit alpha	Copa	0.00883893	0.0668843	2.19185
P18760;F8WGL3;A0A494B9A7	P18760;F8WGL3;A0A494B9A7	Cofilin-1	Cfl1	0.00119954	0.027764	1.49866
A2AJY2;O35206;A2AJY7;A2AJY5	A2AJY2;O35206;A2AJY7;A2AJY5	Collagen alpha-1(XV) chain;Restin	Col15a1	0.0108457	0.0773424	1.45541
Q9D1A2;A0A494B9U6;A0A494B9S3	Q9D1A2	Cytosolic non-specific dipeptidase	Cndp2	0.00119803	0.027764	1.59033
P28654	P28654	Decorin	Dcn	1.69287e-05	0.00207094	2.68445
Q9QZZ6	Q9QZZ6	Dermatopontin	Dpt	0.00278314	0.0418873	9.18372
O08553;Q71H75	O08553	Dihydropyrimidinase-related protein 2	Dpysl2	0.00251767	0.0396948	1.4606
Q62188;Q3TT92;E9PWE8	Q62188;Q3TT92;E9PWE8	Dihydropyrimidinase-related protein 3	Dpysl3	0.00254176	0.0396948	4.47057
O54734	O54734	Dolichyl-diphosphooligosaccharide--protein glycosyltransferase 48 kDa subunit	Ddost	0.00782833	0.0624565	1.53118
P39054;Q3T9X3;Q3TCR7;G3X9G4;F8WIV5;G3UZZ3;P39053;A0A0J9YUE9;A0A0J9YUN4;Q8BZ98;G3UY64;G3UXX2;E9QLL2	P39054;Q3T9X3;Q3TCR7;G3X9G4;F8WIV5;G3UZZ3;P39053;A0A0J9YUE9;A0A0J9YUN4	Dynamin-2;Dynamin-1	Dnm2;Dnm1	0.0108532	0.0773424	1.36846
Q9ESD7;E9QL12;E9PXU9;A0A0N4SWH3;A0A0N4SWG7;A0A0N4SUN3;A0A0N4SVX9;A0A0N4SUJ2;E9Q423;A0A0N4SV63	Q9ESD7;E9QL12;E9PXU9;A0A0N4SWH3;A0A0N4SWG7;A0A0N4SUN3;A0A0N4SVX9;A0A0N4SUJ2;E9Q423;A0A0N4SV63	Dysferlin	Dysf	0.0217082	0.11221	1.55237
P08113;F7C312	P08113	Endoplasmin	Hsp90b1	0.029885	0.142604	1.46175
P60843	P60843	Eukaryotic initiation factor 4A-I	Eif4a1	0.0198734	0.108052	1.34173
Q61554	Q61554	Fibrillin-1	Fbn1	0.0403855	0.163851	2.42891
Q80X90	Q80X90	Filamin-B	Flnb	0.0404046	0.163851	1.82079
P97447;A2AEX8;A2AEX6;A2AEY1;A2AEY2;A2AEX7;A2AEY0	P97447;A2AEX8;A2AEX6;A2AEY1;A2AEY2;A2AEX7	Four and a half LIM domains protein 1	Fhl1	0.0168252	0.101227	2.20732
P16045	P16045	Galectin-1	Lgals1	0.000155327	0.00814358	1.58605
A0A1C7ZMZ5;P46412;A0A1C7ZMZ7;P21765	A0A1C7ZMZ5;P46412;A0A1C7ZMZ7	Glutathione peroxidase 3	Gpx3	1.69011e-05	0.00207094	2.73227
O09131;A0A494BAB1;A0A494B9X6;A0A494BAY2;A0A494BB82;Q8K2Q2	O09131;A0A494BAB1	Glutathione S-transferase omega-1	Gsto1	0.0421264	0.167997	1.27769
P07901;B7ZC50;A2A6A2;B7ZC49	P07901	Heat shock protein HSP 90-alpha	Hsp90aa1	0.0466816	0.181264	1.39616
P61979;B2M1R6;H3BKD0;A0A286YDM3;H3BK96;H3BKI8;H3BLL4;Q8BT23;A0A286YDH1;A0A286YEC4;A0A286YCM2;H3BLP7;A0A286YE41;H3BJ43	P61979;B2M1R6;H3BKD0;A0A286YDM3;H3BK96;H3BKI8;H3BLL4	Heterogeneous nuclear ribonucleoprotein K	Hnrnpk	0.0151733	0.0946194	1.39912
Q8VEK3	Q8VEK3	Heterogeneous nuclear ribonucleoprotein U	Hnrnpu	0.0367452	0.160622	1.35383
P17710;G3UVV4;Q91W97;D3YYR4;D3Z365;B4YB29	P17710;G3UVV4	Hexokinase-1;Hexokinase	Hk1	0.00648547	0.0566706	1.42006
Q61702;F8WJ05	Q61702;F8WJ05	Inter-alpha-trypsin inhibitor heavy chain H1	Itih1	0.00523787	0.0497056	4.15757
A2AUC9	A2AUC9	Kelch-like protein 41	Klhl41	0.0282943	0.140324	1.43242
P51885;CON__Q05443	P51885	Lumican	Lum	5.98031e-05	0.00487727	3.13614
Q9EQK5;E9Q3X0	Q9EQK5;E9Q3X0	Major vault protein	Mvp	0.00476254	0.0478864	2.88844
P26041;P26043;P26040;Q7TSG6;A0A5F8MPB9	P26041	Moesin	Msn	0.00182787	0.0343342	1.42401
P28665;P28666;A0A0N4SVU1	P28665;P28666	Murinoglobulin-1;Murinoglobulin-2	Mug1;Mug2	0.0296109	0.142604	1.45719
Q60605;A0A1W2P6G5;A0A1W2P6F6;A0A1W2P7Q9;Q8CI43	Q60605;A0A1W2P6G5;A0A1W2P6F6;A0A1W2P7Q9	Myosin light polypeptide 6	Myl6	0.00154334	0.033318	1.64612
Q3THE2;Q6ZWQ9	Q3THE2;Q6ZWQ9	Myosin regulatory light chain 12B	Myl12b;Myl12a	0.013102	0.088228	1.64284
Q91Z83;A0A2I3BQV3;Q1WJL6;B8JJH1;A0A2I3BRL9	Q91Z83	Myosin-7	Myh7	0.00196527	0.0343454	4.26356
Q8VDD5;A0A2R8W6V7	Q8VDD5	Myosin-9	Myh9	0.00583618	0.0522409	1.75155
Q9JIF9	Q9JIF9	Myotilin	Myot	0.0148432	0.0946194	1.50613
Q9DCN2;F2Z456	Q9DCN2;F2Z456	NADH-cytochrome b5 reductase 3;NADH-cytochrome b5 reductase 3 membrane-bound form;NADH-cytochrome b5 reductase 3 soluble form;NADH-cytochrome b5 reductase	Cyb5r3	0.00924002	0.0692059	1.61636
Q80XB4;E9Q641;E9PZF4;F7CXG1	Q80XB4;E9Q641;E9PZF4	Nebulin-related-anchoring protein	Nrap	0.00358936	0.0439099	2.40613
Q8BZF8	Q8BZF8	Phosphoglucomutase-like protein 5	Pgm5	0.0126007	0.0856379	1.32617
Q9Z2M7	Q9Z2M7	Phosphomannomutase 2	Pmm2	0.0475416	0.182699	1.41646
P20918	P20918	Plasminogen;Plasmin heavy chain A;Activation peptide;Angiostatin;Plasmin heavy chain A, short form;Plasmin light chain B	Plg	0.00470691	0.0478864	1.90457
Q99K51;A0A1C7CYV0;B1AX58;Q3V0K9	Q99K51;A0A1C7CYV0;B1AX58	Plastin-3	Pls3	0.0143945	0.0942224	1.47504
P48678;D3YUF7	P48678	Prelamin-A/C;Lamin-A/C	Lmna	0.00397209	0.0458315	1.37102
Q9JK53	Q9JK53	Prolargin	Prelp	0.0250892	0.127003	4.02561
E9PZ00;Q8BFQ1;K3W4L3;J3QPG5;Q61207	E9PZ00;Q8BFQ1;K3W4L3;J3QPG5;Q61207	Prosaposin	Psap	0.0207324	0.110272	1.46739
P09103;E9Q8G8	P09103	Protein disulfide-isomerase	P4hb	0.00101248	0.027764	1.82372
P27773;F6Q404	P27773	Protein disulfide-isomerase A3	Pdia3	0.00325182	0.0433688	1.72136
P08003;A0A0R4J0Z1	P08003;A0A0R4J0Z1	Protein disulfide-isomerase A4	Pdia4	0.0150347	0.0946194	2.36846
Q61598;A0A1Y7VL99;A0A1Y7VLG4;B7FAU8	Q61598;A0A1Y7VL99	Rab GDP dissociation inhibitor beta	Gdi2	0.0186084	0.106477	1.22994
P35293;A0A3Q4EI12;A0A452J8C1;A0A3Q4EIF7	P35293;A0A3Q4EI12;A0A452J8C1	Ras-related protein Rab-18	Rab18	0.0414858	0.166397	2.43773
P51150;A0A0N4SVR6;A0A0N4SVG9	P51150	Ras-related protein Rab-7a	Rab7a	0.0153402	0.0946194	1.46295
Q99P72	Q99P72	Reticulon-4	Rtn4	0.0399622	0.163851	3.63498
Q99PT1	Q99PT1	Rho GDP-dissociation inhibitor 1	Arhgdia	0.00182052	0.0343342	1.5178
Q3URD3;F6UV57;F6YCM8;F8WIH0;D3Z7V3;H7BX64	Q3URD3;F6UV57;F6YCM8;F8WIH0;D3Z7V3;H7BX64	Sarcolemmal membrane-associated protein	Slmap	0.0403849	0.163851	1.40056
P42208;F6WYM0;D3YYB1;D3Z3C0;E9Q3V6;F6UKN5;D3YZU7;D3Z1S1;D3YV76	P42208;F6WYM0;D3YYB1;D3Z3C0;E9Q3V6;F6UKN5;D3YZU7;D3Z1S1	Septin-2	Sept2	0.0145392	0.0942224	3.96319
O55131;E9Q9F5;E9Q1G8;Q8C650;Q9DA97;A0A0R4J233;S4R2P6;A0A1W2P6J7	O55131;E9Q9F5;E9Q1G8	Septin-7	Sept7	0.000522761	0.0182717	1.69286
Q921I1;F7BAE9;E9Q2Q7;F7CJN9;D3YYR8	Q921I1	Serotransferrin	Tf	0.021056	0.111188	1.5244
Q60854;F8WIV2;K7E6F1;E9PYY0;E9Q3Y1;E9Q6X2;E9Q108;E9Q0P9;E9PZQ9;E9Q4R2	Q60854;F8WIV2;K7E6F1	Serpin B6	Serpinb6;Serpinb6a	0.00456292	0.0478455	1.31191
P07724;CON__P02768-1	P07724	Serum albumin	Alb	9.23675e-06	0.00207094	1.81518
B2RXQ9;D3Z080;A0A0R4J1T1;Q3UTJ2;A0A0R4J1W0;B7ZWM6;B9EKP8;Z4YJR7;A0A0R4J1X5;F6V513;F7BEU1;A0A1B0GRC3;A0A5F8MPQ4;F6ZWT0;D3Z203	B2RXQ9;D3Z080;A0A0R4J1T1;Q3UTJ2;A0A0R4J1W0;B7ZWM6;B9EKP8;Z4YJR7	Sorbin and SH3 domain-containing protein 2	Sorbs2	0.00739551	0.0609328	1.50468
P26039;F6S1V7;A2AIM2	P26039	Talin-1	Tln1	0.0195841	0.107274	1.51184
P80314;A0A1W2P7B7;A0A1W2P6Q3;A0A1W2P871;A0A1W2P828	P80314;A0A1W2P7B7	T-complex protein 1 subunit beta	Cct2	0.0363388	0.160622	1.3505
P10639	P10639	Thioredoxin	Txn	0.00463961	0.0478864	47.4073
Q91W90;A0A0R4J1Y7;E9PXX7	Q91W90;A0A0R4J1Y7;E9PXX7	Thioredoxin domain-containing protein 5	Txndc5	0.00297043	0.0427509	2.60754
Q8CDN6;A0A498WGD8;A0A494B955;A0A494BBI1;A0A494BB31	Q8CDN6;A0A498WGD8;A0A494B955;A0A494BBI1	Thioredoxin-like protein 1	Txnl1	0.038264	0.162399	1.17489
P40142;A0A286YE28	P40142;A0A286YE28	Transketolase	Tkt	0.0185242	0.106477	1.81252
P68368;A0A0A0MQA5;A0A087WQS4;A0A087WSB0;A0A087WSL5;A0A087WRB4;Q3UX10;A0A087WS35	P68368;A0A0A0MQA5	Tubulin alpha-4A chain	Tuba4a	0.0381966	0.162399	1.27843
P68372;Q9D6F9;Q922F4;A2AQ07;CON__ENSEMBL:ENSBTAP00000025008;G3UZR1	P68372;Q9D6F9	Tubulin beta-4B chain;Tubulin beta-4A chain	Tubb4b;Tubb4a	0.000112503	0.00752048	1.30271
Q9JKB1;A0A2I3BQ39;P58321	Q9JKB1;A0A2I3BQ39;P58321	Ubiquitin carboxyl-terminal hydrolase isozyme L3;Ubiquitin carboxyl-terminal hydrolase isozyme L4	Uchl3;Uchl4	0.00663455	0.0572913	6.02454
Q91ZJ5	Q91ZJ5	UTP--glucose-1-phosphate uridylyltransferase	Ugp2	0.00121381	0.027764	1.67298
Q9EQH3	Q9EQH3	Vacuolar protein sorting-associated protein 35	Vps35	0.036289	0.160622	1.15921
P20152;A0A0A6YWC8;A2AKJ2;P15331;G5E846;A0A2R8W6R6;G3X981;P08553;P19246;P08551;P46660;D3YZ35;A0A0R4J036	P20152;A0A0A6YWC8	Vimentin	Vim	3.13412e-05	0.00287555	2.23258
P29788	P29788	Vitronectin	Vtn	0.012084	0.0835957	2.73878
A0A571BDS0;O70373;E9QQ93	A0A571BDS0;O70373;E9QQ93	Xin actin-binding repeat-containing protein 1	Xirp1	0.00421494	0.0469776	2.77763
Q4U4S6;A0A5F8MPR4;B2BBR6;A0A5F8MPJ5	Q4U4S6;A0A5F8MPR4	Xin actin-binding repeat-containing protein 2	Xirp2	0.00510646	0.0497056	6.59901
F7CVJ5;F7DBB3;E9PYB0	F7CVJ5;F7DBB3;E9PYB0		Ahnak2	2.38237e-06	0.000874328	10.5884
A0A0R4J0I1;P29621;E9Q499;Q80X76	A0A0R4J0I1			0.0367637	0.160622	1.57344

## Sheet: significant down in hom
protein IDs	majority protein IDs	protein names	gene names	p-value	Student's t-test q-value hom_wt	- (wt/hom)
Q9CQ62	Q9CQ62	2,4-dienoyl-CoA reductase, mitochondrial	Decr1	0.0460275	0.179703	-1.23952
Q3U3J1;P50136;A0A0U1RPK5	Q3U3J1;P50136;A0A0U1RPK5	2-oxoisovalerate dehydrogenase subunit alpha, mitochondrial	Bckdha	0.0335122	0.154513	-1.33988		p- and q-values
Q6P3A8	Q6P3A8	2-oxoisovalerate dehydrogenase subunit beta, mitochondrial	Bckdhb	0.0188584	0.106477	-1.37972		≤ 0.001	to	0.05
Q921S7	Q921S7	39S ribosomal protein L37, mitochondrial	Mrpl37	0.00995309	0.0730557	-11.3094
Q99N15;A2AFQ2;O08756	Q99N15;A2AFQ2;O08756	3-hydroxyacyl-CoA dehydrogenase type-2	Hsd17b10	0.000978225	0.027764	-1.28024		ratio wt/hom
Q8BWT1;A0A494B9J2	Q8BWT1	3-ketoacyl-CoA thiolase, mitochondrial	Acaa2	0.0069748	0.0595291	-1.84696		1.1	to	≥ 2.0
Q8QZT1	Q8QZT1	Acetyl-CoA acetyltransferase, mitochondrial	Acat1	0.0363436	0.160622	-1.21463
Q99NB1	Q99NB1	Acetyl-coenzyme A synthetase 2-like, mitochondrial	Acss1	0.00046866	0.0171998	-1.43684
Q99KI0;A0A2R8W744;A0A2R8VHM8	Q99KI0	Aconitate hydratase, mitochondrial	Aco2	0.00381476	0.0451618	-1.25744
Q9QYR9;O55137;Q8BWN8;Q32Q92;Q9QYR7;Q6Q2Z6;A0A1Y7VMZ4;Q91YQ6	Q9QYR9;O55137	Acyl-coenzyme A thioesterase 2, mitochondrial;Acyl-coenzyme A thioesterase 1	Acot2;Acot1	0.00619864	0.0548169	-1.51984
P47738;A0A0G2JEU1;A0A0G2JF60;A0A0G2JFQ0;D3YYF3	P47738;A0A0G2JEU1	Aldehyde dehydrogenase, mitochondrial	Aldh2	0.0344405	0.156045	-1.48536
Q8BW75;E9PVL9;E9Q3X6	Q8BW75	Amine oxidase [flavin-containing] B	Maob	0.0114633	0.0809046	-1.54603
P05201;F7ALS6	P05201	Aspartate aminotransferase, cytoplasmic	Got1	0.0159613	0.0976299	-1.21285
P03930	P03930	ATP synthase protein 8	Mtatp8	0.0338054	0.154513	-1.44698
Q03265;D3Z6F5;D6RJ16	Q03265;D3Z6F5	ATP synthase subunit alpha, mitochondrial;ATP synthase subunit alpha	Atp5a1	0.02073	0.110272	-1.26071
P56480	P56480	ATP synthase subunit beta, mitochondrial	Atp5b	0.0317208	0.149251	-1.53813
Q06185;Q8BTB6	Q06185;Q8BTB6	ATP synthase subunit e, mitochondrial	Atp5i;Atp5k	0.0192607	0.107101	-1.42579
Q9DB20;A0A338P7G3;A0A338P776;F7D3P8;F6XVM5	Q9DB20;A0A338P7G3	ATP synthase subunit O, mitochondrial	Atp5o	0.00433226	0.0469776	-1.59404
P97450;E9QAD6	P97450	ATP synthase-coupling factor 6, mitochondrial	Atp5j	0.000305657	0.0122759	-1.42427
Q60936;F7B1B6;A0A0A6YXI0;F6T0A8	Q60936;F7B1B6	Atypical kinase ADCK3, mitochondrial	Adck3	0.0336129	0.154513	-1.33646
P18572;K3W4Q8;J3QP71	P18572;K3W4Q8;J3QP71	Basigin	Bsg	0.0188063	0.106477	-1.27126
P47934;H7BX88;B7ZDD7;F7BF80	P47934;H7BX88;B7ZDD7	Carnitine O-acetyltransferase	Crat	2.80572e-05	0.00287555	-1.50003
P52825;A2A8E7;A2A8E8;A2A8E9	P52825	Carnitine O-palmitoyltransferase 2, mitochondrial	Cpt2	0.00336194	0.0433688	-1.31658
Q9CZU6	Q9CZU6	Citrate synthase, mitochondrial	Cs	0.0190499	0.106738	-1.2311
Q9DCT8;A0A0G2JF37	Q9DCT8	Cysteine-rich protein 2	Crip2	0.0183933	0.106477	-1.30742
Q9DB77;A0A140LI98	Q9DB77	Cytochrome b-c1 complex subunit 2, mitochondrial	Uqcrc2	0.0137186	0.0907159	-1.15254
P19536;Q9D881	P19536;Q9D881	Cytochrome c oxidase subunit 5B, mitochondrial	Cox5b	0.0401924	0.163851	-1.23563
P62897;CON__P62894;P00015	P62897	Cytochrome c, somatic	Cycs	0.00122453	0.027764	-1.36147
Q99LB2;A0A2I3BRG8;Q9D2U3;A0A2I3BQ25;A0A2I3BPY3	Q99LB2;A0A2I3BRG8	Dehydrogenase/reductase SDR family member 4	Dhrs4	0.04022	0.163851	-1.25446
O35459;F7B227	O35459;F7B227	Delta(3,5)-Delta(2,4)-dienoyl-CoA isomerase, mitochondrial	Ech1	0.0102639	0.0745909	-1.51098
P31001	P31001	Desmin	Des	1.07031e-07	7.85609e-05	-145.028
O08749	O08749	Dihydrolipoyl dehydrogenase, mitochondrial	Dld	0.0412548	0.166379	-1.23023
F6RER8;Q8R2G4;E9QNU1;A0A0R4J1M9;A0A0R4J1Q4;E9Q7Q8;A0A0R4J1N4;F6Z2C7;F6W3A0;E9Q984;E9Q9Q8;E9Q8Z0;E9Q7Z7;E9Q1U7;E9Q630	F6RER8;Q8R2G4;E9QNU1;A0A0R4J1M9;A0A0R4J1Q4;E9Q7Q8;A0A0R4J1N4	Ecto-ADP-ribosyltransferase 3	Art3	0.014634	0.0942224	-1.58978
Q9DCW4;A0A0U1RNP5;A0A0N4SVE0;A0A0U1RNR3;A0A0N4SWE9;A0A0U1RNK9;A0A0U1RQB4	Q9DCW4;A0A0U1RNP5;A0A0N4SVE0;A0A0U1RNR3;A0A0N4SWE9;A0A0U1RNK9	Electron transfer flavoprotein subunit beta	Etfb	0.000148471	0.00814358	-1.41558
Q8K0D5	Q8K0D5	Elongation factor G, mitochondrial	Gfm1	0.00734177	0.0609328	-1.30173
P42125;A0A3Q4EC00;A0A452J8A5;A0A3Q4EC76	P42125;A0A3Q4EC00;A0A452J8A5	Enoyl-CoA delta isomerase 1, mitochondrial	Eci1	0.00537068	0.0497056	-1.35094
Q9WUR2;Q3TCD4;E9PYC6;E9Q858;E9PUY9;E9PYA9;E9PVM6;E9Q7A8;Q78JN3;E9PY42	Q9WUR2;Q3TCD4;E9PYC6;E9Q858;E9PUY9;E9PYA9;E9PVM6;E9Q7A8	Enoyl-CoA delta isomerase 2, mitochondrial	Eci2	0.0381082	0.162399	-1.24805
Q8BH95	Q8BH95	Enoyl-CoA hydratase, mitochondrial	Echs1	0.00870821	0.0668843	-1.22096
Q9D172;A0A1W2P870;A0A1W2P7B6	Q9D172;A0A1W2P870;A0A1W2P7B6	ES1 protein homolog, mitochondrial	D10Jhu81e	0.0121863	0.0835957	-1.25997
P09528;A0A494BAP3;A0A494B9D4;A0A494BA92	P09528;A0A494BAP3;A0A494B9D4;A0A494BA92	Ferritin heavy chain;Ferritin heavy chain, N-terminally processed	Fth1	0.00548522	0.0497056	-3.35427
P70695	P70695	Fructose-1,6-bisphosphatase isozyme 2	Fbp2	0.00342696	0.0433688	-4.43898
P97807;H3BKG7	P97807	Fumarate hydratase, mitochondrial	Fh	0.00283535	0.0418873	-1.4799
Q9DCM2;A0A0N4SVE5	Q9DCM2	Glutathione S-transferase kappa 1	Gstk1	0.00537453	0.0497056	-1.49869
P10649;A2AE89;F6WHQ7;P19639;O35660;G5E8M7;D3YVP8;D3YVP9;A2AE91	P10649;A2AE89;F6WHQ7	Glutathione S-transferase Mu 1	Gstm1	0.0496225	0.18807	-1.1728
Q9CQN1	Q9CQN1	Heat shock protein 75 kDa, mitochondrial	Trap1	0.00210451	0.0359236	-1.51833
Q61425	Q61425	Hydroxyacyl-coenzyme A dehydrogenase, mitochondrial	Hadh	0.0299196	0.142604	-1.3373
Q91VM9;D3Z636;G8JL76	Q91VM9;D3Z636;G8JL76	Inorganic pyrophosphatase 2, mitochondrial	Ppa2	0.00178908	0.0343342	-1.24117
Q91UZ5	Q91UZ5	Inositol monophosphatase 2	Impa2	0.0182734	0.106477	-2.14824
P54071;D6RIL6;A0A0U1RP68;A0A0U1RPR1;D3YVY3	P54071	Isocitrate dehydrogenase [NADP], mitochondrial	Idh2	0.0294152	0.142604	-1.25487
Q71RI9;A0A0G2JGE1	Q71RI9	Kynurenine--oxoglutarate transaminase 3	Ccbl2	0.00248304	0.0396948	-1.51375
P02469;E9QN70	P02469;E9QN70	Laminin subunit beta-1	Lamb1	0.0469212	0.181264	-1.44621
P16125;A0A6I8MX27;D3Z7F0;A0A0N4SVV8	P16125;A0A6I8MX27;D3Z7F0	L-lactate dehydrogenase B chain;L-lactate dehydrogenase	Ldhb	0.000558453	0.018632	-1.31317
P08249;A0A0G2JF23;A0A0G2JGY4	P08249	Malate dehydrogenase, mitochondrial	Mdh2	0.00341895	0.0433688	-1.30401
P45952;D6RFD7	P45952	Medium-chain specific acyl-CoA dehydrogenase, mitochondrial	Acadm	0.000227873	0.00983874	-1.44256
Q78J03	Q78J03	Methionine-R-sulfoxide reductase B2, mitochondrial	Msrb2	0.00358322	0.0439099	-4.71041
Q3ULD5;Q6PD20	Q3ULD5;Q6PD20	Methylcrotonoyl-CoA carboxylase beta chain, mitochondrial	Mccc2	0.00109353	0.027764	-1.39519
Q99MR8;A0A0G2JFQ5;A0A0G2JF64	Q99MR8	Methylcrotonoyl-CoA carboxylase subunit alpha, mitochondrial	Mccc1	0.00748248	0.0609328	-1.31592
Q9JLZ3;A0A0R4J023;A0A0R4J1L8;F6R307;F6RT60;E9Q6L3;E9QMT1	Q9JLZ3;A0A0R4J023;A0A0R4J1L8;F6R307;F6RT60	Methylglutaconyl-CoA hydratase, mitochondrial	Auh	0.00323466	0.0433688	-1.52184
Q9EQ20;A0A1Y7VJ32	Q9EQ20	Methylmalonate-semialdehyde dehydrogenase [acylating], mitochondrial	Aldh6a1	0.0382765	0.162399	-1.29168
P16332	P16332	Methylmalonyl-CoA mutase, mitochondrial	Mut	0.000973058	0.027764	-1.42256
Q9CRB8	Q9CRB8	Mitochondrial fission process protein 1	Mtfp1	0.000130457	0.00797963	-1.50455
Q7TMF3;A0A0R4J275;F6RBR6	Q7TMF3;A0A0R4J275	NADH dehydrogenase [ubiquinone] 1 alpha subcomplex subunit 12	Ndufa12	0.00435215	0.0469776	-1.57503
Q9ERS2	Q9ERS2	NADH dehydrogenase [ubiquinone] 1 alpha subcomplex subunit 13	Ndufa13	0.0153356	0.0946194	-1.37681
Q9CQZ5;A0A2R8W6V1;A0A2R8VI90	Q9CQZ5	NADH dehydrogenase [ubiquinone] 1 alpha subcomplex subunit 6	Ndufa6	0.00371713	0.0447274	-1.42435
Q9D6J6;M0QWP9;D6RGN4	Q9D6J6	NADH dehydrogenase [ubiquinone] flavoprotein 2, mitochondrial	Ndufv2	0.000221861	0.00983874	-1.40233
Q91WD5;D3YXT0;A0A0A6YXD3;A0A0A6YW30	Q91WD5;D3YXT0;A0A0A6YXD3;A0A0A6YW30	NADH dehydrogenase [ubiquinone] iron-sulfur protein 2, mitochondrial	Ndufs2	0.0117035	0.0818133	-1.18476
Q9DCT2	Q9DCT2	NADH dehydrogenase [ubiquinone] iron-sulfur protein 3, mitochondrial	Ndufs3	0.0499701	0.18807	-1.52479
Q99KQ4	Q99KQ4	Nicotinamide phosphoribosyltransferase	Nampt	0.0033173	0.0433688	-1.57025
Q01768;E9PZF0;P15532;Q5NC80;Q5NC79	Q01768;E9PZF0;P15532;Q5NC80	Nucleoside diphosphate kinase B;Nucleoside diphosphate kinase;Nucleoside diphosphate kinase A	Nme2;Gm20390;Nme1	0.0338918	0.154513	-1.23939
Q9DBG5;A0A3B2WCW2	Q9DBG5;A0A3B2WCW2	Perilipin-3	Plin3	0.0135218	0.0902272	-2.27978
P99029;G3UZJ4;A0A494BAZ4;H3BJQ7	P99029;G3UZJ4;A0A494BAZ4;H3BJQ7	Peroxiredoxin-5, mitochondrial	Prdx5	0.0395518	0.163851	-1.41263
P67778;Q5SQG5	P67778;Q5SQG5	Prohibitin	Phb	0.00524254	0.0497056	-1.23527
O35129;F6QPR1;F6Q8V7	O35129;F6QPR1	Prohibitin-2	Phb2	0.0423426	0.167997	-1.14949
Q91ZA3;H3BL62;D3YWM4;D3YZC0;H3BK61	Q91ZA3	Propionyl-CoA carboxylase alpha chain, mitochondrial	Pcca	0.0285393	0.14059	-1.22644
Q99MN9;E9Q1J7;D3YZC1	Q99MN9;E9Q1J7	Propionyl-CoA carboxylase beta chain, mitochondrial	Pccb	0.0356714	0.160622	-1.22415
O55126;Q7TMG8	O55126;Q7TMG8	Protein NipSnap homolog 2	Gbas	0.00755434	0.0609328	-1.42476
Q99MR9	Q99MR9	Protein phosphatase 1 regulatory subunit 3A	Ppp1r3a	0.00876913	0.0668843	-1.92516
Q11011;E9Q039;F6QYF8;E9Q6F4;F6V7K3;F7ANF4	Q11011;E9Q039;F6QYF8;E9Q6F4	Puromycin-sensitive aminopeptidase	Npepps	0.0305219	0.144536	-1.2256
P35486	P35486	Pyruvate dehydrogenase E1 component subunit alpha, somatic form, mitochondrial	Pdha1	0.00285336	0.0418873	-1.21056
E9Q401;F6U7V1;A0A1Y7VJP1;Q80ZZ5;E9PZQ0;A0A1Y7VK09;K3W4M2;A0A1L1SQG7	E9Q401;F6U7V1	Ryanodine receptor 2	Ryr2	0.00805207	0.0635507	-1.27269
O55143;Q8R429;Q64518;B1ATS4;B1ATS5;E9Q559	O55143	Sarcoplasmic/endoplasmic reticulum calcium ATPase 2	Atp2a2	0.0249405	0.127003	-1.20438
Q07417	Q07417	Short-chain specific acyl-CoA dehydrogenase, mitochondrial	Acads	0.0389695	0.163851	-1.14131
Q6PIE5;D3YYN7;Q6PIC6;A0A0G2JGX4;Q8VCE0;Q9WV27;Q9Z1W8;Q64436;Q91WH7;E9QNX7	Q6PIE5;D3YYN7;Q6PIC6;A0A0G2JGX4;Q8VCE0	Sodium/potassium-transporting ATPase subunit alpha-2;Sodium/potassium-transporting ATPase subunit alpha-3	Atp1a2;Atp1a3	0.00111719	0.027764	-1.66112
Q9CQA3	Q9CQA3	Succinate dehydrogenase [ubiquinone] iron-sulfur subunit, mitochondrial	Sdhb	0.00985374	0.0730557	-1.31429
Q8BWF0	Q8BWF0	Succinate-semialdehyde dehydrogenase, mitochondrial	Aldh5a1	0.000317769	0.0122759	-1.50507
Q9WUM5	Q9WUM5	Succinyl-CoA ligase [ADP/GDP-forming] subunit alpha, mitochondrial	Suclg1	0.0430645	0.169943	-1.29406
Q9Z2I8	Q9Z2I8	Succinyl-CoA ligase [GDP-forming] subunit beta, mitochondrial	Suclg2	0.020547	0.110272	-1.72324
P08228	P08228	Superoxide dismutase [Cu-Zn]	Sod1	0.0434638	0.170601	-1.32732
P09671;A0A3B2WBF0	P09671;A0A3B2WBF0	Superoxide dismutase [Mn], mitochondrial	Sod2	0.0374773	0.162399	-1.32513
Q8BMS1	Q8BMS1	Trifunctional enzyme subunit alpha, mitochondrial;Long-chain enoyl-CoA hydratase;Long chain 3-hydroxyacyl-CoA dehydrogenase	Hadha	0.00231892	0.0386839	-1.4024
Q99JY0;D3YXU1	Q99JY0	Trifunctional enzyme subunit beta, mitochondrial;3-ketoacyl-CoA thiolase	Hadhb	0.00333279	0.0433688	-1.47072
P19123;E9Q8P0	P19123;E9Q8P0	Troponin C, slow skeletal and cardiac muscles	Tnnc1	0.00839417	0.065546	-1.60574
Q8BH86;E9QMK9;F7CUW7	Q8BH86;E9QMK9	UPF0317 protein C14orf159 homolog, mitochondrial	9030617O03Rik	1.40172e-05	0.00207094	-2.32543
P50544;B1AR28	P50544;B1AR28	Very long-chain specific acyl-CoA dehydrogenase, mitochondrial	Acadvl	0.000112705	0.00752048	-1.44668
Q8BGC4	Q8BGC4	Zinc-binding alcohol dehydrogenase domain-containing protein 2	Zadh2	0.0216305	0.11221	-2.33145
Q14BI5	Q14BI5		Myom2	0.0499632	0.18807	-1.15845
F8VPN4;A0A0G2JGI9;F6XXE6;E0CYU6;E0CX86;F7CSZ6	F8VPN4;A0A0G2JGI9		Agl	0.0331979	0.154513	-1.26375

## Sheet: list of all quantified proteins
protein IDs	majority protein IDs	protein names	gene names	p-value	Student's t-test q-value hom_wt	hom/wt
P31001	P31001	Desmin	Des	1.07031e-07	7.85609e-05	0.00689524
F7CVJ5;F7DBB3;E9PYB0	F7CVJ5;F7DBB3;E9PYB0		Ahnak2	2.38237e-06	0.000874328	10.5884		p- and q-values
P07724;CON__P02768-1	P07724	Serum albumin	Alb	9.23675e-06	0.00207094	1.81518		≤ 0.001	to	0.05
Q8BH86;E9QMK9;F7CUW7	Q8BH86;E9QMK9	UPF0317 protein C14orf159 homolog, mitochondrial	9030617O03Rik	1.40172e-05	0.00207094	0.430028
A0A1C7ZMZ5;P46412;A0A1C7ZMZ7;P21765	A0A1C7ZMZ5;P46412;A0A1C7ZMZ7	Glutathione peroxidase 3	Gpx3	1.69011e-05	0.00207094	2.73227		ratio hom/wt
P28654	P28654	Decorin	Dcn	1.69287e-05	0.00207094	2.68445		≤ 0.5	to	≥ 2.0
P47934;H7BX88;B7ZDD7;F7BF80	P47934;H7BX88;B7ZDD7	Carnitine O-acetyltransferase	Crat	2.80572e-05	0.00287555	0.666652
P20152;A0A0A6YWC8;A2AKJ2;P15331;G5E846;A0A2R8W6R6;G3X981;P08553;P19246;P08551;P46660;D3YZ35;A0A0R4J036	P20152;A0A0A6YWC8	Vimentin	Vim	3.13412e-05	0.00287555	2.23258
P51885;CON__Q05443	P51885	Lumican	Lum	5.98031e-05	0.00487727	3.13614
P68372;Q9D6F9;Q922F4;A2AQ07;CON__ENSEMBL:ENSBTAP00000025008;G3UZR1	P68372;Q9D6F9	Tubulin beta-4B chain;Tubulin beta-4A chain	Tubb4b;Tubb4a	0.000112503	0.00752048	1.30271
P50544;B1AR28	P50544;B1AR28	Very long-chain specific acyl-CoA dehydrogenase, mitochondrial	Acadvl	0.000112705	0.00752048	0.691236
Q9CRB8	Q9CRB8	Mitochondrial fission process protein 1	Mtfp1	0.000130457	0.00797963	0.664652
Q9DCW4;A0A0U1RNP5;A0A0N4SVE0;A0A0U1RNR3;A0A0N4SWE9;A0A0U1RNK9;A0A0U1RQB4	Q9DCW4;A0A0U1RNP5;A0A0N4SVE0;A0A0U1RNR3;A0A0N4SWE9;A0A0U1RNK9	Electron transfer flavoprotein subunit beta	Etfb	0.000148471	0.00814358	0.706422
P16045	P16045	Galectin-1	Lgals1	0.000155327	0.00814358	1.58605
P07356;B0V2N7;B0V2N8;B0V2N5	P07356;B0V2N7;B0V2N8;B0V2N5	Annexin A2;Annexin	Anxa2	0.000217181	0.00983874	1.9193
Q9D6J6;M0QWP9;D6RGN4	Q9D6J6	NADH dehydrogenase [ubiquinone] flavoprotein 2, mitochondrial	Ndufv2	0.000221861	0.00983874	0.713101
P45952;D6RFD7	P45952	Medium-chain specific acyl-CoA dehydrogenase, mitochondrial	Acadm	0.000227873	0.00983874	0.693213
P97450;E9QAD6	P97450	ATP synthase-coupling factor 6, mitochondrial	Atp5j	0.000305657	0.0122759	0.702113
Q8BWF0	Q8BWF0	Succinate-semialdehyde dehydrogenase, mitochondrial	Aldh5a1	0.000317769	0.0122759	0.66442
Q99NB1	Q99NB1	Acetyl-coenzyme A synthetase 2-like, mitochondrial	Acss1	0.00046866	0.0171998	0.69597
O55131;E9Q9F5;E9Q1G8;Q8C650;Q9DA97;A0A0R4J233;S4R2P6;A0A1W2P6J7	O55131;E9Q9F5;E9Q1G8	Septin-7	Sept7	0.000522761	0.0182717	1.69286
P16125;A0A6I8MX27;D3Z7F0;A0A0N4SVV8	P16125;A0A6I8MX27;D3Z7F0	L-lactate dehydrogenase B chain;L-lactate dehydrogenase	Ldhb	0.000558453	0.018632	0.761514
P16332	P16332	Methylmalonyl-CoA mutase, mitochondrial	Mut	0.000973058	0.027764	0.702959
Q99N15;A2AFQ2;O08756	Q99N15;A2AFQ2;O08756	3-hydroxyacyl-CoA dehydrogenase type-2	Hsd17b10	0.000978225	0.027764	0.781101
P09103;E9Q8G8	P09103	Protein disulfide-isomerase	P4hb	0.00101248	0.027764	1.82372
Q3ULD5;Q6PD20	Q3ULD5;Q6PD20	Methylcrotonoyl-CoA carboxylase beta chain, mitochondrial	Mccc2	0.00109353	0.027764	0.716751
Q6PIE5;D3YYN7;Q6PIC6;A0A0G2JGX4;Q8VCE0;Q9WV27;Q9Z1W8;Q64436;Q91WH7;E9QNX7	Q6PIE5;D3YYN7;Q6PIC6;A0A0G2JGX4;Q8VCE0	Sodium/potassium-transporting ATPase subunit alpha-2;Sodium/potassium-transporting ATPase subunit alpha-3	Atp1a2;Atp1a3	0.00111719	0.027764	0.602005
Q9D1A2;A0A494B9U6;A0A494B9S3	Q9D1A2	Cytosolic non-specific dipeptidase	Cndp2	0.00119803	0.027764	1.59033
P18760;F8WGL3;A0A494B9A7	P18760;F8WGL3;A0A494B9A7	Cofilin-1	Cfl1	0.00119954	0.027764	1.49866
Q91ZJ5	Q91ZJ5	UTP--glucose-1-phosphate uridylyltransferase	Ugp2	0.00121381	0.027764	1.67298
Q01339	Q01339	Beta-2-glycoprotein 1	Apoh	0.00121738	0.027764	1.40706
P62897;CON__P62894;P00015	P62897	Cytochrome c, somatic	Cycs	0.00122453	0.027764	0.7345
P06728	P06728	Apolipoprotein A-IV	Apoa4	0.00124824	0.027764	1.41737
Q60605;A0A1W2P6G5;A0A1W2P6F6;A0A1W2P7Q9;Q8CI43	Q60605;A0A1W2P6G5;A0A1W2P6F6;A0A1W2P7Q9	Myosin light polypeptide 6	Myl6	0.00154334	0.033318	1.64612
Q91VM9;D3Z636;G8JL76	Q91VM9;D3Z636;G8JL76	Inorganic pyrophosphatase 2, mitochondrial	Ppa2	0.00178908	0.0343342	0.805691
P46471;Q8BVQ9	P46471;Q8BVQ9	26S protease regulatory subunit 7	Psmc2	0.00179659	0.0343342	1.35811
P60710;P63260;E9Q5F4;E9Q1F2;G3UZ07;G3UYG0;E9Q606;B1ATY1;F8WGM8	P60710;P63260;E9Q5F4;E9Q1F2;G3UZ07;G3UYG0;E9Q606;B1ATY1	Actin, cytoplasmic 1;Actin, cytoplasmic 1, N-terminally processed;Actin, cytoplasmic 2;Actin, cytoplasmic 2, N-terminally processed	Actb;Actg1	0.00180022	0.0343342	2.35839
Q99PT1	Q99PT1	Rho GDP-dissociation inhibitor 1	Arhgdia	0.00182052	0.0343342	1.5178
P26041;P26043;P26040;Q7TSG6;A0A5F8MPB9	P26041	Moesin	Msn	0.00182787	0.0343342	1.42401
Q00896;A0A0R4J0X5;P07758;A0A0A0MQA3;D3YZL0	Q00896;A0A0R4J0X5;P07758;A0A0A0MQA3	Alpha-1-antitrypsin 1-3;Alpha-1-antitrypsin 1-1	Serpina1c;Serpina1a	0.00189304	0.0343342	1.54449
P10107;A0A494BBD8	P10107;A0A494BBD8	Annexin A1	Anxa1	0.00191785	0.0343342	8.02608
Q91Z83;A0A2I3BQV3;Q1WJL6;B8JJH1;A0A2I3BRL9	Q91Z83	Myosin-7	Myh7	0.00196527	0.0343454	4.26356
Q9CQN1	Q9CQN1	Heat shock protein 75 kDa, mitochondrial	Trap1	0.00210451	0.0359236	0.658618
Q8BMS1	Q8BMS1	Trifunctional enzyme subunit alpha, mitochondrial;Long-chain enoyl-CoA hydratase;Long chain 3-hydroxyacyl-CoA dehydrogenase	Hadha	0.00231892	0.0386839	0.713062
Q71RI9;A0A0G2JGE1	Q71RI9	Kynurenine--oxoglutarate transaminase 3	Ccbl2	0.00248304	0.0396948	0.660609
O08553;Q71H75	O08553	Dihydropyrimidinase-related protein 2	Dpysl2	0.00251767	0.0396948	1.4606
Q62188;Q3TT92;E9PWE8	Q62188;Q3TT92;E9PWE8	Dihydropyrimidinase-related protein 3	Dpysl3	0.00254176	0.0396948	4.47057
Q9QZZ6	Q9QZZ6	Dermatopontin	Dpt	0.00278314	0.0418873	9.18372
P97807;H3BKG7	P97807	Fumarate hydratase, mitochondrial	Fh	0.00283535	0.0418873	0.675721
P35486	P35486	Pyruvate dehydrogenase E1 component subunit alpha, somatic form, mitochondrial	Pdha1	0.00285336	0.0418873	0.826061
Q91W90;A0A0R4J1Y7;E9PXX7	Q91W90;A0A0R4J1Y7;E9PXX7	Thioredoxin domain-containing protein 5	Txndc5	0.00297043	0.0427509	2.60754
Q9JLZ3;A0A0R4J023;A0A0R4J1L8;F6R307;F6RT60;E9Q6L3;E9QMT1	Q9JLZ3;A0A0R4J023;A0A0R4J1L8;F6R307;F6RT60	Methylglutaconyl-CoA hydratase, mitochondrial	Auh	0.00323466	0.0433688	0.657097
P27773;F6Q404	P27773	Protein disulfide-isomerase A3	Pdia3	0.00325182	0.0433688	1.72136
Q99KQ4	Q99KQ4	Nicotinamide phosphoribosyltransferase	Nampt	0.0033173	0.0433688	0.636842
Q99JY0;D3YXU1	Q99JY0	Trifunctional enzyme subunit beta, mitochondrial;3-ketoacyl-CoA thiolase	Hadhb	0.00333279	0.0433688	0.679939
P52825;A2A8E7;A2A8E8;A2A8E9	P52825	Carnitine O-palmitoyltransferase 2, mitochondrial	Cpt2	0.00336194	0.0433688	0.759546
P08249;A0A0G2JF23;A0A0G2JGY4	P08249	Malate dehydrogenase, mitochondrial	Mdh2	0.00341895	0.0433688	0.766864
P70695	P70695	Fructose-1,6-bisphosphatase isozyme 2	Fbp2	0.00342696	0.0433688	0.225277
Q78J03	Q78J03	Methionine-R-sulfoxide reductase B2, mitochondrial	Msrb2	0.00358322	0.0439099	0.212296
Q80XB4;E9Q641;E9PZF4;F7CXG1	Q80XB4;E9Q641;E9PZF4	Nebulin-related-anchoring protein	Nrap	0.00358936	0.0439099	2.40613
Q9CQZ5;A0A2R8W6V1;A0A2R8VI90	Q9CQZ5	NADH dehydrogenase [ubiquinone] 1 alpha subcomplex subunit 6	Ndufa6	0.00371713	0.0447274	0.702075
Q99KI0;A0A2R8W744;A0A2R8VHM8	Q99KI0	Aconitate hydratase, mitochondrial	Aco2	0.00381476	0.0451618	0.795266
P48678;D3YUF7	P48678	Prelamin-A/C;Lamin-A/C	Lmna	0.00397209	0.0458315	1.37102
P62196;Q8K1K2	P62196;Q8K1K2	26S protease regulatory subunit 8	Psmc5	0.00399621	0.0458315	4.44328
A0A571BDS0;O70373;E9QQ93	A0A571BDS0;O70373;E9QQ93	Xin actin-binding repeat-containing protein 1	Xirp1	0.00421494	0.0469776	2.77763
Q9DB20;A0A338P7G3;A0A338P776;F7D3P8;F6XVM5	Q9DB20;A0A338P7G3	ATP synthase subunit O, mitochondrial	Atp5o	0.00433226	0.0469776	0.627336
P23953;D3Z5G7;A0A1D5RM42;Q8VCC2;Q64176;Q91WU0;H3BL34;D3Z298	P23953	Carboxylesterase 1C	Ces1c	0.00435134	0.0469776	1.47778
Q7TMF3;A0A0R4J275;F6RBR6	Q7TMF3;A0A0R4J275	NADH dehydrogenase [ubiquinone] 1 alpha subcomplex subunit 12	Ndufa12	0.00435215	0.0469776	0.634907
Q68FD5;Q5SXR6;F6Z1R4	Q68FD5;Q5SXR6	Clathrin heavy chain 1;Clathrin heavy chain	Cltc	0.00447436	0.0475968	1.59902
Q60854;F8WIV2;K7E6F1;E9PYY0;E9Q3Y1;E9Q6X2;E9Q108;E9Q0P9;E9PZQ9;E9Q4R2	Q60854;F8WIV2;K7E6F1	Serpin B6	Serpinb6;Serpinb6a	0.00456292	0.0478455	1.31191
P10639	P10639	Thioredoxin	Txn	0.00463961	0.0478864	47.4073
P20918	P20918	Plasminogen;Plasmin heavy chain A;Activation peptide;Angiostatin;Plasmin heavy chain A, short form;Plasmin light chain B	Plg	0.00470691	0.0478864	1.90457
Q9EQK5;E9Q3X0	Q9EQK5;E9Q3X0	Major vault protein	Mvp	0.00476254	0.0478864	2.88844
Q4U4S6;A0A5F8MPR4;B2BBR6;A0A5F8MPJ5	Q4U4S6;A0A5F8MPR4	Xin actin-binding repeat-containing protein 2	Xirp2	0.00510646	0.0497056	6.59901
Q00623;A0A1L1STX7;CON__P15497	Q00623	Apolipoprotein A-I;Proapolipoprotein A-I;Truncated apolipoprotein A-I	Apoa1	0.00514076	0.0497056	1.42366
Q61702;F8WJ05	Q61702;F8WJ05	Inter-alpha-trypsin inhibitor heavy chain H1	Itih1	0.00523787	0.0497056	4.15757
P67778;Q5SQG5	P67778;Q5SQG5	Prohibitin	Phb	0.00524254	0.0497056	0.809542
P42125;A0A3Q4EC00;A0A452J8A5;A0A3Q4EC76	P42125;A0A3Q4EC00;A0A452J8A5	Enoyl-CoA delta isomerase 1, mitochondrial	Eci1	0.00537068	0.0497056	0.740226
Q9DCM2;A0A0N4SVE5	Q9DCM2	Glutathione S-transferase kappa 1	Gstk1	0.00537453	0.0497056	0.66725
P48036;A0A0G2JGQ0	P48036;A0A0G2JGQ0	Annexin A5	Anxa5	0.00546606	0.0497056	1.44359
P09528;A0A494BAP3;A0A494B9D4;A0A494BA92	P09528;A0A494BAP3;A0A494B9D4;A0A494BA92	Ferritin heavy chain;Ferritin heavy chain, N-terminally processed	Fth1	0.00548522	0.0497056	0.298128
Q8VDD5;A0A2R8W6V7	Q8VDD5	Myosin-9	Myh9	0.00583618	0.0522409	1.75155
Q9QYR9;O55137;Q8BWN8;Q32Q92;Q9QYR7;Q6Q2Z6;A0A1Y7VMZ4;Q91YQ6	Q9QYR9;O55137	Acyl-coenzyme A thioesterase 2, mitochondrial;Acyl-coenzyme A thioesterase 1	Acot2;Acot1	0.00619864	0.0548169	0.657965
P17710;G3UVV4;Q91W97;D3YYR4;D3Z365;B4YB29	P17710;G3UVV4	Hexokinase-1;Hexokinase	Hk1	0.00648547	0.0566706	1.42006
Q9JKB1;A0A2I3BQ39;P58321	Q9JKB1;A0A2I3BQ39;P58321	Ubiquitin carboxyl-terminal hydrolase isozyme L3;Ubiquitin carboxyl-terminal hydrolase isozyme L4	Uchl3;Uchl4	0.00663455	0.0572913	6.02454
Q8BWT1;A0A494B9J2	Q8BWT1	3-ketoacyl-CoA thiolase, mitochondrial	Acaa2	0.0069748	0.0595291	0.541429
Q8K0D5	Q8K0D5	Elongation factor G, mitochondrial	Gfm1	0.00734177	0.0609328	0.768206
B2RXQ9;D3Z080;A0A0R4J1T1;Q3UTJ2;A0A0R4J1W0;B7ZWM6;B9EKP8;Z4YJR7;A0A0R4J1X5;F6V513;F7BEU1;A0A1B0GRC3;A0A5F8MPQ4;F6ZWT0;D3Z203	B2RXQ9;D3Z080;A0A0R4J1T1;Q3UTJ2;A0A0R4J1W0;B7ZWM6;B9EKP8;Z4YJR7	Sorbin and SH3 domain-containing protein 2	Sorbs2	0.00739551	0.0609328	1.50468
P19253;A0A1B0GQW6;A0A1B0GSF0;A0A1B0GSB2;A0A1B0GSQ6;A0A1B0GTA1;A0A1B0GS68;A0A1B0GSL5;A0A1B0GSC2;A0A1B0GRH1	P19253;A0A1B0GQW6;A0A1B0GSF0;A0A1B0GSB2;A0A1B0GSQ6;A0A1B0GTA1;A0A1B0GS68	60S ribosomal protein L13a	Rpl13a	0.00742127	0.0609328	5.94451
Q99MR8;A0A0G2JFQ5;A0A0G2JF64	Q99MR8	Methylcrotonoyl-CoA carboxylase subunit alpha, mitochondrial	Mccc1	0.00748248	0.0609328	0.759924
O55126;Q7TMG8	O55126;Q7TMG8	Protein NipSnap homolog 2	Gbas	0.00755434	0.0609328	0.701872
O54734	O54734	Dolichyl-diphosphooligosaccharide--protein glycosyltransferase 48 kDa subunit	Ddost	0.00782833	0.0624565	1.53118
E9Q401;F6U7V1;A0A1Y7VJP1;Q80ZZ5;E9PZQ0;A0A1Y7VK09;K3W4M2;A0A1L1SQG7	E9Q401;F6U7V1	Ryanodine receptor 2	Ryr2	0.00805207	0.0635507	0.78574
P19123;E9Q8P0	P19123;E9Q8P0	Troponin C, slow skeletal and cardiac muscles	Tnnc1	0.00839417	0.065546	0.622765
Q8BH95	Q8BH95	Enoyl-CoA hydratase, mitochondrial	Echs1	0.00870821	0.0668843	0.819026
Q99MR9	Q99MR9	Protein phosphatase 1 regulatory subunit 3A	Ppp1r3a	0.00876913	0.0668843	0.519438
Q8CIE6;F8WHL2	Q8CIE6;F8WHL2	Coatomer subunit alpha;Xenin;Proxenin;Coatomer subunit alpha	Copa	0.00883893	0.0668843	2.19185
Q9DCN2;F2Z456	Q9DCN2;F2Z456	NADH-cytochrome b5 reductase 3;NADH-cytochrome b5 reductase 3 membrane-bound form;NADH-cytochrome b5 reductase 3 soluble form;NADH-cytochrome b5 reductase	Cyb5r3	0.00924002	0.0692059	1.61636
Q9CQA3	Q9CQA3	Succinate dehydrogenase [ubiquinone] iron-sulfur subunit, mitochondrial	Sdhb	0.00985374	0.0730557	0.760866
Q921S7	Q921S7	39S ribosomal protein L37, mitochondrial	Mrpl37	0.00995309	0.0730557	0.0884218
O35459;F7B227	O35459;F7B227	Delta(3,5)-Delta(2,4)-dienoyl-CoA isomerase, mitochondrial	Ech1	0.0102639	0.0745909	0.66182
A2AJY2;O35206;A2AJY7;A2AJY5	A2AJY2;O35206;A2AJY7;A2AJY5	Collagen alpha-1(XV) chain;Restin	Col15a1	0.0108457	0.0773424	1.45541
P39054;Q3T9X3;Q3TCR7;G3X9G4;F8WIV5;G3UZZ3;P39053;A0A0J9YUE9;A0A0J9YUN4;Q8BZ98;G3UY64;G3UXX2;E9QLL2	P39054;Q3T9X3;Q3TCR7;G3X9G4;F8WIV5;G3UZZ3;P39053;A0A0J9YUE9;A0A0J9YUN4	Dynamin-2;Dynamin-1	Dnm2;Dnm1	0.0108532	0.0773424	1.36846
Q8BW75;E9PVL9;E9Q3X6	Q8BW75	Amine oxidase [flavin-containing] B	Maob	0.0114633	0.0809046	0.64682
Q91WD5;D3YXT0;A0A0A6YXD3;A0A0A6YW30	Q91WD5;D3YXT0;A0A0A6YXD3;A0A0A6YW30	NADH dehydrogenase [ubiquinone] iron-sulfur protein 2, mitochondrial	Ndufs2	0.0117035	0.0818133	0.844053
P29788	P29788	Vitronectin	Vtn	0.012084	0.0835957	2.73878
Q9D172;A0A1W2P870;A0A1W2P7B6	Q9D172;A0A1W2P870;A0A1W2P7B6	ES1 protein homolog, mitochondrial	D10Jhu81e	0.0121863	0.0835957	0.793671
Q8BZF8	Q8BZF8	Phosphoglucomutase-like protein 5	Pgm5	0.0126007	0.0856379	1.32617
Q3THE2;Q6ZWQ9	Q3THE2;Q6ZWQ9	Myosin regulatory light chain 12B	Myl12b;Myl12a	0.013102	0.088228	1.64284
Q9DBG5;A0A3B2WCW2	Q9DBG5;A0A3B2WCW2	Perilipin-3	Plin3	0.0135218	0.0902272	0.438638
Q9DB77;A0A140LI98	Q9DB77	Cytochrome b-c1 complex subunit 2, mitochondrial	Uqcrc2	0.0137186	0.0907159	0.867646
Q99K51;A0A1C7CYV0;B1AX58;Q3V0K9	Q99K51;A0A1C7CYV0;B1AX58	Plastin-3	Pls3	0.0143945	0.0942224	1.47504
P42208;F6WYM0;D3YYB1;D3Z3C0;E9Q3V6;F6UKN5;D3YZU7;D3Z1S1;D3YV76	P42208;F6WYM0;D3YYB1;D3Z3C0;E9Q3V6;F6UKN5;D3YZU7;D3Z1S1	Septin-2	Sept2	0.0145392	0.0942224	3.96319
F6RER8;Q8R2G4;E9QNU1;A0A0R4J1M9;A0A0R4J1Q4;E9Q7Q8;A0A0R4J1N4;F6Z2C7;F6W3A0;E9Q984;E9Q9Q8;E9Q8Z0;E9Q7Z7;E9Q1U7;E9Q630	F6RER8;Q8R2G4;E9QNU1;A0A0R4J1M9;A0A0R4J1Q4;E9Q7Q8;A0A0R4J1N4	Ecto-ADP-ribosyltransferase 3	Art3	0.014634	0.0942224	0.629017
Q9JIF9	Q9JIF9	Myotilin	Myot	0.0148432	0.0946194	1.50613
P08003;A0A0R4J0Z1	P08003;A0A0R4J0Z1	Protein disulfide-isomerase A4	Pdia4	0.0150347	0.0946194	2.36846
P61979;B2M1R6;H3BKD0;A0A286YDM3;H3BK96;H3BKI8;H3BLL4;Q8BT23;A0A286YDH1;A0A286YEC4;A0A286YCM2;H3BLP7;A0A286YE41;H3BJ43	P61979;B2M1R6;H3BKD0;A0A286YDM3;H3BK96;H3BKI8;H3BLL4	Heterogeneous nuclear ribonucleoprotein K	Hnrnpk	0.0151733	0.0946194	1.39912
Q9ERS2	Q9ERS2	NADH dehydrogenase [ubiquinone] 1 alpha subcomplex subunit 13	Ndufa13	0.0153356	0.0946194	0.726314
P51150;A0A0N4SVR6;A0A0N4SVG9	P51150	Ras-related protein Rab-7a	Rab7a	0.0153402	0.0946194	1.46295
P05201;F7ALS6	P05201	Aspartate aminotransferase, cytoplasmic	Got1	0.0159613	0.0976299	0.824501
Q9DBC7;P12849;D3Z068;D3Z0V6;D3Z4L4;A2AI69;D3YTM5	Q9DBC7	cAMP-dependent protein kinase type I-alpha regulatory subunit;cAMP-dependent protein kinase type I-alpha regulatory subunit, N-terminally processed	Prkar1a	0.0163828	0.0993798	1.29688
P97447;A2AEX8;A2AEX6;A2AEY1;A2AEY2;A2AEX7;A2AEY0	P97447;A2AEX8;A2AEX6;A2AEY1;A2AEY2;A2AEX7	Four and a half LIM domains protein 1	Fhl1	0.0168252	0.101227	2.20732
Q7TPR4;A1BN54	Q7TPR4;A1BN54	Alpha-actinin-1	Actn1	0.0172075	0.102685	4.85113
Q9CVB6;D3YXG6	Q9CVB6;D3YXG6	Actin-related protein 2/3 complex subunit 2	Arpc2	0.0175692	0.103998	1.46393
Q91UZ5	Q91UZ5	Inositol monophosphatase 2	Impa2	0.0182734	0.106477	0.465497
Q9DCT8;A0A0G2JF37	Q9DCT8	Cysteine-rich protein 2	Crip2	0.0183933	0.106477	0.764865
P40142;A0A286YE28	P40142;A0A286YE28	Transketolase	Tkt	0.0185242	0.106477	1.81252
Q61598;A0A1Y7VL99;A0A1Y7VLG4;B7FAU8	Q61598;A0A1Y7VL99	Rab GDP dissociation inhibitor beta	Gdi2	0.0186084	0.106477	1.22994
P18572;K3W4Q8;J3QP71	P18572;K3W4Q8;J3QP71	Basigin	Bsg	0.0188063	0.106477	0.78662
Q6P3A8	Q6P3A8	2-oxoisovalerate dehydrogenase subunit beta, mitochondrial	Bckdhb	0.0188584	0.106477	0.724786
Q9CZU6	Q9CZU6	Citrate synthase, mitochondrial	Cs	0.0190499	0.106738	0.81228
Q06185;Q8BTB6	Q06185;Q8BTB6	ATP synthase subunit e, mitochondrial	Atp5i;Atp5k	0.0192607	0.107101	0.701365
P59999;Q3TX55;E9PWA7	P59999;Q3TX55;E9PWA7	Actin-related protein 2/3 complex subunit 4	Arpc4	0.0195782	0.107274	1.25014
P26039;F6S1V7;A2AIM2	P26039	Talin-1	Tln1	0.0195841	0.107274	1.51184
P60843	P60843	Eukaryotic initiation factor 4A-I	Eif4a1	0.0198734	0.108052	1.34173
Q9Z2I8	Q9Z2I8	Succinyl-CoA ligase [GDP-forming] subunit beta, mitochondrial	Suclg2	0.020547	0.110272	0.580303
Q03265;D3Z6F5;D6RJ16	Q03265;D3Z6F5	ATP synthase subunit alpha, mitochondrial;ATP synthase subunit alpha	Atp5a1	0.02073	0.110272	0.793201
E9PZ00;Q8BFQ1;K3W4L3;J3QPG5;Q61207	E9PZ00;Q8BFQ1;K3W4L3;J3QPG5;Q61207	Prosaposin	Psap	0.0207324	0.110272	1.46739
Q921I1;F7BAE9;E9Q2Q7;F7CJN9;D3YYR8	Q921I1	Serotransferrin	Tf	0.021056	0.111188	1.5244
P40124;B1ARS0	P40124	Adenylyl cyclase-associated protein 1	Cap1	0.0215292	0.11221	1.86028
Q8BGC4	Q8BGC4	Zinc-binding alcohol dehydrogenase domain-containing protein 2	Zadh2	0.0216305	0.11221	0.428918
Q9ESD7;E9QL12;E9PXU9;A0A0N4SWH3;A0A0N4SWG7;A0A0N4SUN3;A0A0N4SVX9;A0A0N4SUJ2;E9Q423;A0A0N4SV63	Q9ESD7;E9QL12;E9PXU9;A0A0N4SWH3;A0A0N4SWG7;A0A0N4SUN3;A0A0N4SVX9;A0A0N4SUJ2;E9Q423;A0A0N4SV63	Dysferlin	Dysf	0.0217082	0.11221	1.55237
Q8VDM4;E9Q2S8;A0A338P6M5	Q8VDM4	26S proteasome non-ATPase regulatory subunit 2	Psmd2	0.0231931	0.119047	1.57427
O55143;Q8R429;Q64518;B1ATS4;B1ATS5;E9Q559	O55143	Sarcoplasmic/endoplasmic reticulum calcium ATPase 2	Atp2a2	0.0249405	0.127003	0.8303
Q9JK53	Q9JK53	Prolargin	Prelp	0.0250892	0.127003	4.02561
P61161	P61161	Actin-related protein 2	Actr2	0.0256977	0.129193	2.8919
P57780;A0A1L1SV25;E9Q2W9;A0A1L1SVJ6;D3Z761;D3Z0L8	P57780;A0A1L1SV25;E9Q2W9	Alpha-actinin-4	Actn4	0.0274163	0.136895	1.31179
A2AUC9	A2AUC9	Kelch-like protein 41	Klhl41	0.0282943	0.140324	1.43242
Q91ZA3;H3BL62;D3YWM4;D3YZC0;H3BK61	Q91ZA3	Propionyl-CoA carboxylase alpha chain, mitochondrial	Pcca	0.0285393	0.14059	0.815369
P54071;D6RIL6;A0A0U1RP68;A0A0U1RPR1;D3YVY3	P54071	Isocitrate dehydrogenase [NADP], mitochondrial	Idh2	0.0294152	0.142604	0.796896
P28665;P28666;A0A0N4SVU1	P28665;P28666	Murinoglobulin-1;Murinoglobulin-2	Mug1;Mug2	0.0296109	0.142604	1.45719
P18242;F8WIR1;F6Y6L6;A0A1B0GT66	P18242;F8WIR1;F6Y6L6;A0A1B0GT66	Cathepsin D	Ctsd	0.0297246	0.142604	1.22408
P08113;F7C312	P08113	Endoplasmin	Hsp90b1	0.029885	0.142604	1.46175
Q61425	Q61425	Hydroxyacyl-coenzyme A dehydrogenase, mitochondrial	Hadh	0.0299196	0.142604	0.747775
Q11011;E9Q039;F6QYF8;E9Q6F4;F6V7K3;F7ANF4	Q11011;E9Q039;F6QYF8;E9Q6F4	Puromycin-sensitive aminopeptidase	Npepps	0.0305219	0.144536	0.815926
P56480	P56480	ATP synthase subunit beta, mitochondrial	Atp5b	0.0317208	0.149251	0.65014
F8VPN4;A0A0G2JGI9;F6XXE6;E0CYU6;E0CX86;F7CSZ6	F8VPN4;A0A0G2JGI9		Agl	0.0331979	0.154513	0.791295
Q3U3J1;P50136;A0A0U1RPK5	Q3U3J1;P50136;A0A0U1RPK5	2-oxoisovalerate dehydrogenase subunit alpha, mitochondrial	Bckdha	0.0335122	0.154513	0.746334
Q60936;F7B1B6;A0A0A6YXI0;F6T0A8	Q60936;F7B1B6	Atypical kinase ADCK3, mitochondrial	Adck3	0.0336129	0.154513	0.748247
P03930	P03930	ATP synthase protein 8	Mtatp8	0.0338054	0.154513	0.691093
Q01768;E9PZF0;P15532;Q5NC80;Q5NC79	Q01768;E9PZF0;P15532;Q5NC80	Nucleoside diphosphate kinase B;Nucleoside diphosphate kinase;Nucleoside diphosphate kinase A	Nme2;Gm20390;Nme1	0.0338918	0.154513	0.806852
P47738;A0A0G2JEU1;A0A0G2JF60;A0A0G2JFQ0;D3YYF3	P47738;A0A0G2JEU1	Aldehyde dehydrogenase, mitochondrial	Aldh2	0.0344405	0.156045	0.673237
Q99MN9;E9Q1J7;D3YZC1	Q99MN9;E9Q1J7	Propionyl-CoA carboxylase beta chain, mitochondrial	Pccb	0.0356714	0.160622	0.816895
Q9EQH3	Q9EQH3	Vacuolar protein sorting-associated protein 35	Vps35	0.036289	0.160622	1.15921
P80314;A0A1W2P7B7;A0A1W2P6Q3;A0A1W2P871;A0A1W2P828	P80314;A0A1W2P7B7	T-complex protein 1 subunit beta	Cct2	0.0363388	0.160622	1.3505
Q8QZT1	Q8QZT1	Acetyl-CoA acetyltransferase, mitochondrial	Acat1	0.0363436	0.160622	0.823299
Q8VEK3	Q8VEK3	Heterogeneous nuclear ribonucleoprotein U	Hnrnpu	0.0367452	0.160622	1.35383
A0A0R4J0I1;P29621;E9Q499;Q80X76	A0A0R4J0I1		Serpina3f	0.0367637	0.160622	1.57344
P09671;A0A3B2WBF0	P09671;A0A3B2WBF0	Superoxide dismutase [Mn], mitochondrial	Sod2	0.0374773	0.162399	0.754642
Q9WUR2;Q3TCD4;E9PYC6;E9Q858;E9PUY9;E9PYA9;E9PVM6;E9Q7A8;Q78JN3;E9PY42	Q9WUR2;Q3TCD4;E9PYC6;E9Q858;E9PUY9;E9PYA9;E9PVM6;E9Q7A8	Enoyl-CoA delta isomerase 2, mitochondrial	Eci2	0.0381082	0.162399	0.801248
P68368;A0A0A0MQA5;A0A087WQS4;A0A087WSB0;A0A087WSL5;A0A087WRB4;Q3UX10;A0A087WS35	P68368;A0A0A0MQA5	Tubulin alpha-4A chain	Tuba4a	0.0381966	0.162399	1.27843
Q8CDN6;A0A498WGD8;A0A494B955;A0A494BBI1;A0A494BB31	Q8CDN6;A0A498WGD8;A0A494B955;A0A494BBI1	Thioredoxin-like protein 1	Txnl1	0.038264	0.162399	1.17489
Q9EQ20;A0A1Y7VJ32	Q9EQ20	Methylmalonate-semialdehyde dehydrogenase [acylating], mitochondrial	Aldh6a1	0.0382765	0.162399	0.774187
Q07417	Q07417	Short-chain specific acyl-CoA dehydrogenase, mitochondrial	Acads	0.0389695	0.163851	0.876185
P99029;G3UZJ4;A0A494BAZ4;H3BJQ7	P99029;G3UZJ4;A0A494BAZ4;H3BJQ7	Peroxiredoxin-5, mitochondrial	Prdx5	0.0395518	0.163851	0.707901
Q99P72	Q99P72	Reticulon-4	Rtn4	0.0399622	0.163851	3.63498
P19536;Q9D881	P19536;Q9D881	Cytochrome c oxidase subunit 5B, mitochondrial	Cox5b	0.0401924	0.163851	0.809303
Q99LB2;A0A2I3BRG8;Q9D2U3;A0A2I3BQ25;A0A2I3BPY3	Q99LB2;A0A2I3BRG8	Dehydrogenase/reductase SDR family member 4	Dhrs4	0.04022	0.163851	0.797153
Q3URD3;F6UV57;F6YCM8;F8WIH0;D3Z7V3;H7BX64	Q3URD3;F6UV57;F6YCM8;F8WIH0;D3Z7V3;H7BX64	Sarcolemmal membrane-associated protein	Slmap	0.0403849	0.163851	1.40056
Q61554	Q61554	Fibrillin-1	Fbn1	0.0403855	0.163851	2.42891
Q80X90	Q80X90	Filamin-B	Flnb	0.0404046	0.163851	1.82079
O08749	O08749	Dihydrolipoyl dehydrogenase, mitochondrial	Dld	0.0412548	0.166379	0.812859
P35293;A0A3Q4EI12;A0A452J8C1;A0A3Q4EIF7	P35293;A0A3Q4EI12;A0A452J8C1	Ras-related protein Rab-18	Rab18	0.0414858	0.166397	2.43773
O09131;A0A494BAB1;A0A494B9X6;A0A494BAY2;A0A494BB82;Q8K2Q2	O09131;A0A494BAB1	Glutathione S-transferase omega-1	Gsto1	0.0421264	0.167997	1.27769
O35129;F6QPR1;F6Q8V7	O35129;F6QPR1	Prohibitin-2	Phb2	0.0423426	0.167997	0.869955
Q9WUM5	Q9WUM5	Succinyl-CoA ligase [ADP/GDP-forming] subunit alpha, mitochondrial	Suclg1	0.0430645	0.169943	0.772764
P08228	P08228	Superoxide dismutase [Cu-Zn]	Sod1	0.0434638	0.170601	0.753395
Q9CQ62	Q9CQ62	2,4-dienoyl-CoA reductase, mitochondrial	Decr1	0.0460275	0.179703	0.806763
P07901;B7ZC50;A2A6A2;B7ZC49	P07901	Heat shock protein HSP 90-alpha	Hsp90aa1	0.0466816	0.181264	1.39616
P02469;E9QN70	P02469;E9QN70	Laminin subunit beta-1	Lamb1	0.0469212	0.181264	0.691463
Q9Z2M7	Q9Z2M7	Phosphomannomutase 2	Pmm2	0.0475416	0.182699	1.41646
O35639;Q3TET3;A0A0G2JDV9;A0A0G2JGL7	O35639;Q3TET3	Annexin A3;Annexin	Anxa3	0.048367	0.184903	1.18489
P10649;A2AE89;F6WHQ7;P19639;O35660;G5E8M7;D3YVP8;D3YVP9;A2AE91	P10649;A2AE89;F6WHQ7	Glutathione S-transferase Mu 1	Gstm1	0.0496225	0.18807	0.85266
Q14BI5	Q14BI5		Myom2	0.0499632	0.18807	0.86322
Q9DCT2	Q9DCT2	NADH dehydrogenase [ubiquinone] iron-sulfur protein 3, mitochondrial	Ndufs3	0.0499701	0.18807	0.655826
Q8BG32;G3UXL5;G3UYH2;G3UYL8;G3UX15;G3UYI4;G3UZ33;G3UYL3;G3UWW7	Q8BG32;G3UXL5;G3UYH2	26S proteasome non-ATPase regulatory subunit 11	Psmd11	0.0502202	0.18807	2.95874
P70670;Q60817	P70670	Nascent polypeptide-associated complex subunit alpha, muscle-specific form	Naca	0.0518442	0.193095	0.767936
Q8BTM8;B7FAV1;B7FAU9;F6XC15	Q8BTM8;B7FAV1;B7FAU9	Filamin-A	Flna	0.0520882	0.193095	1.6932
Q9DCD0	Q9DCD0	6-phosphogluconate dehydrogenase, decarboxylating	Pgd	0.0540559	0.199382	1.32659
P51881	P51881	ADP/ATP translocase 2;ADP/ATP translocase 2, N-terminally processed	Slc25a5	0.0544664	0.199892	1.15237
Q9DCX2;B1ASE2	Q9DCX2;B1ASE2	ATP synthase subunit d, mitochondrial	Atp5h	0.0549724	0.200745	0.765803
Q9CZY3;B7ZBY7;E9PY39;Q9D2M8;B2KF55;A6X925;B7ZBY6	Q9CZY3;B7ZBY7;E9PY39;Q9D2M8	Ubiquitin-conjugating enzyme E2 variant 1;Ubiquitin-conjugating enzyme E2 variant 2	Ube2v1;Gm20431;Ube2v2	0.0553177	0.201006	4.10329
P26231;Q61301;A0A494BAD0;E0CXB9;A0A494BAM5;A0A494BBB4;Q8BS72	P26231	Catenin alpha-1	Ctnna1	0.055965	0.202356	1.26092
Q9D832;Q9QYJ3;Q3TYL7	Q9D832;Q9QYJ3;Q3TYL7	DnaJ homolog subfamily B member 4;DnaJ homolog subfamily B member 1	Dnajb4;Dnajb1	0.0564658	0.203166	2.5112
Q9CZ13;A0A0A6YW82;A0A0A6YVZ0;A0A0A6YWX6	Q9CZ13	Cytochrome b-c1 complex subunit 1, mitochondrial	Uqcrc1	0.0569673	0.203971	0.846486
P07309	P07309	Transthyretin	Ttr	0.0577302	0.205023	2.54677
Q61147;G3X9T8;G3X8Q5;E9PZD8;G3UXG1	Q61147;G3X9T8;G3X8Q5;E9PZD8	Ceruloplasmin	Cp	0.0578197	0.205023	3.20926
Q9D8W5;Q3TRH2;B1AT36	Q9D8W5;Q3TRH2;B1AT36	26S proteasome non-ATPase regulatory subunit 12	Psmd12	0.0581509	0.205206	3.38567
Q8C0M9	Q8C0M9	Isoaspartyl peptidase/L-asparaginase;Isoaspartyl peptidase/L-asparaginase alpha chain;Isoaspartyl peptidase/L-asparaginase beta chain	Asrgl1	0.0586942	0.206132	0.518527
Q9DCL9;D3Z6P1;D6RCU8	Q9DCL9;D3Z6P1	Multifunctional protein ADE2;Phosphoribosylaminoimidazole-succinocarboxamide synthase;Phosphoribosylaminoimidazole carboxylase	Paics	0.0600078	0.209742	0.540702
Q91YY4;A0A0R4J1C5	Q91YY4;A0A0R4J1C5	ATP synthase mitochondrial F1 complex assembly factor 2	Atpaf2	0.0612574	0.213094	0.605509
Q8BH59;V9GXX9	Q8BH59	Calcium-binding mitochondrial carrier protein Aralar1	Slc25a12	0.0620196	0.214199	0.831648
P28650;J3QN31	P28650;J3QN31	Adenylosuccinate synthetase isozyme 1	Adssl1	0.0621587	0.214199	0.829317
Q9Z1Z0	Q9Z1Z0	General vesicular transport factor p115	Uso1	0.0641344	0.21955	1.70934
O35855;O88374;A0A1B0GX27;A0A1B0GST1;A0A1B0GQY4	O35855;O88374;A0A1B0GX27	Branched-chain-amino-acid aminotransferase, mitochondrial;Branched-chain-amino-acid aminotransferase	Bcat2	0.0643509	0.21955	0.823421
Q8CGY6	Q8CGY6	Protein unc-45 homolog B	Unc45b	0.0646088	0.21955	0.731835
Q9CPQ1	Q9CPQ1	Cytochrome c oxidase subunit 6C	Cox6c	0.0658742	0.221981	0.571956
Q99KB8;E9PYA3;A0A0R4J052;G5E8T9;E9Q2H8;D3YWI0	Q99KB8;E9PYA3;A0A0R4J052;G5E8T9;E9Q2H8	Hydroxyacylglutathione hydrolase, mitochondrial	Hagh	0.0659289	0.221981	1.28555
Q61738;G3X9Q1;Q3TZS3	Q61738;G3X9Q1;Q3TZS3	Integrin alpha-7;Integrin alpha-7 heavy chain;Integrin alpha-7 light chain	Itga7	0.0678476	0.227398	0.636066
Q562E2	Q562E2	BTB/POZ domain-containing protein KCTD19	Kctd19	0.0687212	0.227827	0.906397
A0A286YDI8;G3X972	A0A286YDI8;G3X972		Sec24c	0.0688614	0.227827	2.00056
Q9DC69;A0A0R3P9C8	Q9DC69;A0A0R3P9C8	NADH dehydrogenase [ubiquinone] 1 alpha subcomplex subunit 9, mitochondrial	Ndufa9	0.0689069	0.227827	0.884671
P11276;B7ZNJ1;A0A087WS56;B9EHT6;A0A087WSN6;Q3UHL6;A0A087WR50;A0A087WS99;Q4KL80	P11276;B7ZNJ1;A0A087WS56;B9EHT6;A0A087WSN6;Q3UHL6;A0A087WR50	Fibronectin;Anastellin	Fn1	0.0693226	0.228174	1.75703
Q6ZWN5;F7CJS8;D3YWH9;Q9CXW7;D3YUV6;D3Z673	Q6ZWN5;F7CJS8;D3YWH9;Q9CXW7	40S ribosomal protein S9	Rps9	0.0700102	0.229409	2.12074
Q61247;Q5ND35;E9PXE0	Q61247;Q5ND35	Alpha-2-antiplasmin	Serpinf2	0.0704677	0.229881	1.4114
P47757;A2AMW0;F7CAZ6;A0A0A0MQI9;F6YHZ8	P47757;A2AMW0;F7CAZ6	F-actin-capping protein subunit beta	Capzb	0.0715693	0.231424	1.17668
P38647	P38647	Stress-70 protein, mitochondrial	Hspa9	0.071571	0.231424	0.849045
P24369	P24369	Peptidyl-prolyl cis-trans isomerase B	Ppib	0.0723746	0.232419	1.53786
Q9D6J5;Q3V406;F6VCY0;E9Q9J5;F6Z9R1	Q9D6J5;Q3V406	NADH dehydrogenase [ubiquinone] 1 beta subcomplex subunit 8, mitochondrial	Ndufb8	0.0725122	0.232419	0.789652
P63323;Q6ZWZ6;F7AEH4;A0A1W2P7A1	P63323;Q6ZWZ6;F7AEH4;A0A1W2P7A1	40S ribosomal protein S12	Rps12	0.0728632	0.232529	1.24854
Q9DCZ4	Q9DCZ4	Apolipoprotein O	Apoo	0.0751041	0.238643	0.823908
Q91VR2;Q8C2Q8;A2AKU9;A2AKV1;A2AKV2;A2AKV3;A2AKV0	Q91VR2;Q8C2Q8;A2AKU9;A2AKV1;A2AKV2;A2AKV3;A2AKV0	ATP synthase subunit gamma, mitochondrial;ATP synthase subunit gamma	Atp5c1	0.0764249	0.241793	0.862789
Q9D1D4;A0A1Y7VM54	Q9D1D4;A0A1Y7VM54	Transmembrane emp24 domain-containing protein 10	Tmed10	0.0774677	0.24404	1.27636
E9Q447;A3KGU9;A3KGU5;A3KGU7;A3KGU4	E9Q447;A3KGU9;A3KGU5;A3KGU7		Sptan1	0.0784548	0.245921	1.11751
P63038;D3Z2F2;D3Z7J9	P63038	60 kDa heat shock protein, mitochondrial	Hspd1	0.0787348	0.245921	0.86684
Q63918	Q63918	Serum deprivation-response protein	Sdpr	0.0798074	0.247588	0.840846
Q9CR61	Q9CR61	NADH dehydrogenase [ubiquinone] 1 beta subcomplex subunit 7	Ndufb7	0.0799434	0.247588	0.855972
Q05816	Q05816	Fatty acid-binding protein, epidermal	Fabp5	0.0817132	0.252006	0.341585
Q61233;D3YZ25;D3YVW8;D3Z7D9;D3Z311	Q61233	Plastin-2	Lcp1	0.0825278	0.253453	3.55778
Q9D8Y0;Q8C845;Q9D4J1	Q9D8Y0;Q8C845	EF-hand domain-containing protein D2	Efhd2	0.0831433	0.25428	2.75063
Q2TPA8;B1AX78;B1AX77	Q2TPA8;B1AX78	Hydroxysteroid dehydrogenase-like protein 2	Hsdl2	0.0852522	0.257593	0.754603
B7ZCI2;B7ZCI3;A0A1B0GXL1;Q0II04;F6RM14;Q3TR73;Q9DC07	B7ZCI2;B7ZCI3;A0A1B0GXL1		Nebl	0.0855653	0.257593	0.902122
Q91VI7;A0A1B0GSG5;A0A1B0GRG4;A0A1B0GRY7	Q91VI7;A0A1B0GSG5;A0A1B0GRG4	Ribonuclease inhibitor	Rnh1	0.085777	0.257593	1.27969
Q3UH68;D3YU22;A0A571BG24;D3Z589;A0A5F8MPN3;D3YU59;D3YV55;F6X3N8	Q3UH68;D3YU22;A0A571BG24;D3Z589;A0A5F8MPN3	LIM and calponin homology domains-containing protein 1	Limch1	0.0859899	0.257593	1.33924
Q3B7Z2	Q3B7Z2	Oxysterol-binding protein 1	Osbp	0.0864975	0.257593	3.03219
Q9CZJ2;Q8K0U4	Q9CZJ2;Q8K0U4	Heat shock 70 kDa protein 12B;Heat shock 70 kDa protein 12A	Hspa12b;Hspa12a	0.086644	0.257593	0.859204
Q8VCT4	Q8VCT4	Carboxylesterase 1D	Ces1d	0.0866834	0.257593	0.32267
P21981;G3UXE8	P21981	Protein-glutamine gamma-glutamyltransferase 2	Tgm2	0.0889371	0.263225	1.1899
P14602;D3YZ06	P14602;D3YZ06	Heat shock protein beta-1	Hspb1	0.0913895	0.268613	1.40833
P23927;A0A1L1SRG5	P23927;A0A1L1SRG5	Alpha-crystallin B chain	Cryab	0.0914896	0.268613	1.24837
Q8R1G2;A0A2I3BPJ4;E0CXT6;E0CXH4	Q8R1G2;A0A2I3BPJ4	Carboxymethylenebutenolidase homolog	Cmbl	0.0932535	0.272333	0.785716
Q9CQH3;D3Z568;F6Y6V5;D3YX99;D3Z6W9	Q9CQH3;D3Z568;F6Y6V5;D3YX99;D3Z6W9	NADH dehydrogenase [ubiquinone] 1 beta subcomplex subunit 5, mitochondrial	Ndufb5	0.0938611	0.272333	0.753149
Q8R4N0	Q8R4N0	Citrate lyase subunit beta-like protein, mitochondrial	Clybl	0.0938697	0.272333	0.833619
Q8R1Q8	Q8R1Q8	Cytoplasmic dynein 1 light intermediate chain 1	Dync1li1	0.0943516	0.272654	1.41964
P60229	P60229	Eukaryotic translation initiation factor 3 subunit E	Eif3e	0.0961953	0.276204	1.83016
Q3V384;F6VT60;E9Q4K2	Q3V384;F6VT60	Lactation elevated protein 1	Lace1	0.0963328	0.276204	2.96216
Q8K199	Q8K199	COX assembly mitochondrial protein 2 homolog	Cmc2	0.0974554	0.278336	2.01698
P19324;A0A140LHR4	P19324	Serpin H1	Serpinh1	0.0979873	0.27877	2.6757
Q9JM76	Q9JM76	Actin-related protein 2/3 complex subunit 3	Arpc3	0.0989707	0.280481	1.43955
Q9WVA4;Q9R1Q8;A0A0A6YXG6	Q9WVA4	Transgelin-2	Tagln2	0.100273	0.282729	1.4453
P17047	P17047	Lysosome-associated membrane glycoprotein 2	Lamp2	0.100534	0.282729	1.69828
Q5DTJ9	Q5DTJ9	Myopalladin	Mypn	0.102946	0.287528	0.395467
Q8BVI4;A0A0G2JGY0;D3YWR7;A0A0G2JGJ1;D3Z1A1	Q8BVI4;A0A0G2JGY0;D3YWR7;A0A0G2JGJ1	Dihydropteridine reductase	Qdpr	0.103097	0.287528	0.351017
O08677;D3YTY9;A0A0R4J038;D3Z2B2;Q6S9I3;Q6S9I2;A0A338P699;Q6S9I0;CON__P01045-1;CON__Q2KJ62;CON__P01044-1	O08677;D3YTY9;A0A0R4J038	Kininogen-1;Kininogen-1 heavy chain;Bradykinin;Kininogen-1 light chain	Kng1	0.103416	0.287528	1.49776
Q60675;A0A1W2P7N3;A0A087WRP2	Q60675	Laminin subunit alpha-2	Lama2	0.104081	0.288284	0.722297
P09542;A0A0G2JDW2;A0A0G2JDM3	P09542;A0A0G2JDW2;A0A0G2JDM3	Myosin light chain 3	Myl3	0.106728	0.294504	0.768679
Q8CAK1	Q8CAK1	Putative transferase CAF17 homolog, mitochondrial	Iba57	0.10828	0.297667	2.11048
A0A0R4J140;Z4YLI8;Q5SW19	A0A0R4J140;Z4YLI8;Q5SW19	Clustered mitochondria protein homolog	Cluh	0.109553	0.2993	0.838688
Q9WVK4;Q9QXY6	Q9WVK4	EH domain-containing protein 1	Ehd1	0.109689	0.2993	0.717813
P19221;H7BX99;CON__P00735	P19221;H7BX99	Prothrombin;Activation peptide fragment 1;Activation peptide fragment 2;Thrombin light chain;Thrombin heavy chain;Prothrombin	F2	0.11107	0.301945	1.96333
Q9D1G3	Q9D1G3	Protein-cysteine N-palmitoyltransferase HHAT-like protein	Hhatl	0.111606	0.302282	0.631118
P0DN34	P0DN34		Ndufb1	0.112217	0.302821	0.821879
E9Q557;E9PZW0	E9Q557;E9PZW0	Desmoplakin	Dsp	0.112716	0.303053	0.870788
Q9QZ57	Q9QZ57	Heat shock protein beta-3	Hspb3	0.114017	0.305434	1.72871
Q9Z2I9	Q9Z2I9	Succinyl-CoA ligase [ADP-forming] subunit beta, mitochondrial	Sucla2	0.114642	0.30599	0.852519
Q9JHW2;A0A338P6G0;A0A338P7A1	Q9JHW2;A0A338P6G0;A0A338P7A1	Omega-amidase NIT2	Nit2	0.11558	0.306841	0.85999
Q9CQ54;A0A0U1RPJ5	Q9CQ54;A0A0U1RPJ5	NADH dehydrogenase [ubiquinone] 1 subunit C2	Ndufc2	0.115797	0.306841	0.793028
Q1XH17	Q1XH17	Tripartite motif-containing protein 72	Trim72	0.11669	0.307374	2.13792
Q9DCV4;A2AGJ2	Q9DCV4	Regulator of microtubule dynamics protein 1	Rmdn1	0.116836	0.307374	0.699836
P49813;Q9JLH8	P49813	Tropomodulin-1	Tmod1	0.117359	0.307642	0.853983
E9QA15;Q8VCQ8;S4R1T7;E9Q0M9;E9QA16;D3Z6I7;E9Q9F3	E9QA15;Q8VCQ8;S4R1T7;E9Q0M9;E9QA16;D3Z6I7		Cald1	0.11778	0.307642	1.62994
Q91Z53;D6REG4;B1AXQ0	Q91Z53;D6REG4	Glyoxylate reductase/hydroxypyruvate reductase	Grhpr	0.118281	0.307642	1.23701
P50462;A0A140LHC6	P50462;A0A140LHC6	Cysteine and glycine-rich protein 3	Csrp3	0.118892	0.307642	0.837655
Q99L47;F8WJK8;E9Q1V0;E9Q1X9	Q99L47;F8WJK8;E9Q1V0	Hsc70-interacting protein	St13	0.119033	0.307642	1.21665
E9Q616;A0A494BBD5	E9Q616		Ahnak	0.120876	0.311307	1.25342
P14206;A0A1L1SRW0;A0A1L1SUK3	P14206	40S ribosomal protein SA	Rpsa	0.121379	0.311512	1.20033
Q9R1P0;E9Q0X0;E9PW69	Q9R1P0;E9Q0X0;E9PW69	Proteasome subunit alpha type-4;Proteasome subunit alpha type	Psma4	0.123034	0.314182	1.59471
Q9EQP2	Q9EQP2	EH domain-containing protein 4	Ehd4	0.123666	0.314182	1.30822
P06151;A0A1B0GSR9;A0A1B0GSX0;D3YZQ9;A0A1B0GSL7;A0A1B0GT41;A0A1B0GQX5;A0A1B0GRW9;A0A1B0GS79;P00342;A0A1B0GRC1;A0A1B0GRS2;A0A1B0GSR2;D3YVR7;D3YZE4;A0A1B0GRE9	P06151;A0A1B0GSR9;A0A1B0GSX0;D3YZQ9	L-lactate dehydrogenase A chain;L-lactate dehydrogenase	Ldha	0.123704	0.314182	1.12564
Q3UGC7;Q66JS6	Q3UGC7;Q66JS6	Eukaryotic translation initiation factor 3 subunit J-A;Eukaryotic translation initiation factor 3 subunit J-B	Eif3j1;Eif3j2	0.124992	0.315311	3.39635
Q91VD9;A0A087WQR0;A0A087WSU3;A0A087WQ77;A0A087WP77;A0A087WR47	Q91VD9	NADH-ubiquinone oxidoreductase 75 kDa subunit, mitochondrial	Ndufs1	0.125307	0.315311	0.847873
Q8VHX6	Q8VHX6	Filamin-C	Flnc	0.125532	0.315311	1.31738
D9J302;D9J2Z9;D9J300;D9J301;Q8CI51;A0A0G2JEJ0;A0A0G2JGZ5	D9J302;D9J2Z9;D9J300;D9J301;Q8CI51;A0A0G2JEJ0	PDZ and LIM domain protein 5	Pdlim5	0.125867	0.315311	1.16774
Q99J39	Q99J39	Malonyl-CoA decarboxylase, mitochondrial	Mlycd	0.133788	0.334014	0.368095
Q78IK4;B1AV14	Q78IK4;B1AV14	MICOS complex subunit Mic27	Apool	0.13425	0.334032	0.85088
Q3UMF0;B1AZ15;B1AZ14;B1AZ26	Q3UMF0;B1AZ15;B1AZ14;B1AZ26	Cordon-bleu protein-like 1	Cobll1	0.135076	0.334274	0.681922
O88342;A0A0J9YU05	O88342	WD repeat-containing protein 1	Wdr1	0.135258	0.334274	1.20757
P58252	P58252	Elongation factor 2	Eef2	0.136574	0.336148	1.17508
Q99LF4	Q99LF4	tRNA-splicing ligase RtcB homolog	Rtcb	0.13772	0.336148	1.16717
Q80XN0;D3Z2Y8	Q80XN0;D3Z2Y8	D-beta-hydroxybutyrate dehydrogenase, mitochondrial	Bdh1	0.137831	0.336148	1.30486
O70400;S4R1V0	O70400;S4R1V0	PDZ and LIM domain protein 1	Pdlim1	0.137848	0.336148	1.30406
G3X8R0;A0A494BBE3;Q60870	G3X8R0;A0A494BBE3	Receptor expression-enhancing protein	Reep5	0.138339	0.336227	1.21812
Q9WUA3;Q8C605;F6YL81	Q9WUA3;Q8C605;F6YL81	ATP-dependent 6-phosphofructokinase, platelet type;ATP-dependent 6-phosphofructokinase	Pfkp	0.139009	0.336742	1.88803
F8VQJ3;P02468;F6SFQ3;F6TLW1	F8VQJ3;P02468	Laminin subunit gamma-1	Lamc1	0.14096	0.340344	0.798705
P47857;A0A2R8VHV2;A0A2R8VHA5	P47857	ATP-dependent 6-phosphofructokinase, muscle type	Pfkm	0.141818	0.341294	0.775508
Q9R112;F6ZKZ3;H3BLH2	Q9R112;F6ZKZ3;H3BLH2	Sulfide:quinone oxidoreductase, mitochondrial	Sqrdl	0.14241	0.341598	0.794826
P70404	P70404	Isocitrate dehydrogenase [NAD] subunit gamma 1, mitochondrial	Idh3g	0.144736	0.346046	0.751935
Q8K2B3;A0A1Y7VJ55	Q8K2B3	Succinate dehydrogenase [ubiquinone] flavoprotein subunit, mitochondrial	Sdha	0.146664	0.349518	0.855167
Q9DBL1;E9Q5L3;A0A140LHL4	Q9DBL1;E9Q5L3	Short/branched chain specific acyl-CoA dehydrogenase, mitochondrial	Acadsb	0.148056	0.351693	0.751771
Q922B2;Q8BJY7	Q922B2	Aspartate--tRNA ligase, cytoplasmic	Dars	0.150271	0.355803	1.95029
Q9R1P4;A0A1B0GS70	Q9R1P4;A0A1B0GS70	Proteasome subunit alpha type-1	Psma1	0.152506	0.359933	1.29129
Q921G7;Q6PF96	Q921G7;Q6PF96	Electron transfer flavoprotein-ubiquinone oxidoreductase, mitochondrial	Etfdh	0.154252	0.362887	0.842919
D3Z158;Q8BML9;A0A140LHJ3;A0A140LJK5;A0A140LHB3;A0A140LIS6;A0A140LHZ5;A0A140LJH1;F6TDS3	D3Z158;Q8BML9;A0A140LHJ3;A0A140LJK5;A0A140LHB3;A0A140LIS6;A0A140LHZ5		Qars	0.155931	0.364714	1.3759
P24270;A2AL20	P24270	Catalase	Cat	0.156269	0.364714	1.18356
Q9CWJ9	Q9CWJ9	Bifunctional purine biosynthesis protein PURH;Phosphoribosylaminoimidazolecarboxamide formyltransferase;IMP cyclohydrolase	Atic	0.156519	0.364714	1.18817
P41216;D3Z041;D3Z457;Q8JZR0;F6WNZ2;A0A1B0GRS8;D3YVF6	P41216;D3Z041	Long-chain-fatty-acid--CoA ligase 1	Acsl1	0.158042	0.367098	0.9045
Q9CPP6;D3YTQ8	Q9CPP6;D3YTQ8	NADH dehydrogenase [ubiquinone] 1 alpha subcomplex subunit 5	Ndufa5	0.159376	0.369029	0.377138
Q9JKS4	Q9JKS4	LIM domain-binding protein 3	Ldb3	0.160644	0.370217	0.886908
Q9JK42	Q9JK42	[Pyruvate dehydrogenase (acetyl-transferring)] kinase isozyme 2, mitochondrial	Pdk2	0.160898	0.370217	0.8937
Q9CX56;Q3TG45;Q9CPS5	Q9CX56;Q3TG45;Q9CPS5	26S proteasome non-ATPase regulatory subunit 8	Psmd8	0.163107	0.374126	1.22142
P17742;A0A1L1SST0;V9GXC1;V9GX31	P17742;A0A1L1SST0	Peptidyl-prolyl cis-trans isomerase A;Peptidyl-prolyl cis-trans isomerase A, N-terminally processed	Ppia	0.166023	0.379629	1.11501
P28271	P28271	Cytoplasmic aconitate hydratase	Aco1	0.166936	0.380048	0.714476
Q65CL1	Q65CL1	Catenin alpha-3	Ctnna3	0.167242	0.380048	0.856056
Q9JHU4;F6ZX84	Q9JHU4	Cytoplasmic dynein 1 heavy chain 1	Dync1h1	0.16792	0.380412	1.19275
P80315;G5E839;G3UYW5	P80315;G5E839	T-complex protein 1 subunit delta	Cct4	0.168585	0.380743	1.14552
Q9WTI7;Q5ND45	Q9WTI7;Q5ND45	Unconventional myosin-Ic	Myo1c	0.169296	0.381175	1.09996
Q01853	Q01853	Transitional endoplasmic reticulum ATPase	Vcp	0.17084	0.383475	1.10646
Q8K4L3;Q8K4L2;E9Q3Z5;A0A1B0GS91;F6R6A4	Q8K4L3;Q8K4L2;E9Q3Z5;A0A1B0GS91	Supervillin	Svil	0.17178	0.384411	1.4447
A0A0R4J1L2;F6ZFU0;P57776;Q91VK2;Q80T06;A0A0R4J1E2;D3Z7N2;D3YY68;E9QN08;D3YUQ9;D3YZT9	A0A0R4J1L2;F6ZFU0;P57776;Q91VK2;Q80T06;A0A0R4J1E2;D3Z7N2;D3YY68;E9QN08	Elongation factor 1-delta	Eef1d	0.174507	0.389325	4.08043
Q9DB15	Q9DB15	39S ribosomal protein L12, mitochondrial	Mrpl12	0.176262	0.392049	0.888508
A0A2R8VHF9;E9QPE7;A0A338P6K2;O08638	A0A2R8VHF9;E9QPE7;A0A338P6K2;O08638	Myosin-11	Myh11	0.177178	0.392538	1.2076
Q62407;A0A087WSE3;E9QQ25;A0A0R4J1J0	Q62407;A0A087WSE3;E9QQ25	Striated muscle-specific serine/threonine-protein kinase	Speg	0.177551	0.392538	0.832079
Q99JZ4;P36536;A0A1W2P720;A0A1W2P869;A0A1W2P6N3	Q99JZ4;P36536;A0A1W2P720;A0A1W2P869;A0A1W2P6N3	GTP-binding protein SAR1a	Sar1a	0.178228	0.392851	2.27672
Q91WP6;G3X8T9;Q5I2A0;F2Z405;D3Z450	Q91WP6;G3X8T9;Q5I2A0;F2Z405	Serine protease inhibitor A3N;Serine protease inhibitor A3G	Serpina3n;Serpina3g	0.179653	0.394805	1.67118
Q64514;A0A087WRC0;A0A087WP19;A0A087WQR6	Q64514;A0A087WRC0	Tripeptidyl-peptidase 2	Tpp2	0.180837	0.396221	1.44685
P53994;P59279;Q3TEG7;G3UXQ7;G3V022;A0A1D5RMH1;S4R232	P53994;P59279;Q3TEG7	Ras-related protein Rab-2A;Ras-related protein Rab-2B	Rab2a;Rab2b	0.181466	0.396417	1.61306
P04117	P04117	Fatty acid-binding protein, adipocyte	Fabp4	0.183025	0.398636	0.842127
P62141;P63087;A0A0G2JGC1;A0A0G2JFF1;A0A0J9YUU8	P62141;P63087;A0A0G2JGC1;A0A0G2JFF1	Serine/threonine-protein phosphatase PP1-beta catalytic subunit;Serine/threonine-protein phosphatase PP1-gamma catalytic subunit	Ppp1cb;Ppp1cc	0.186503	0.405009	1.22338
Q61768;E9QAK5	Q61768;E9QAK5	Kinesin-1 heavy chain;Kinesin-like protein	Kif5b	0.188837	0.408612	1.8198
Q8VEM8;G5E902	Q8VEM8;G5E902	Phosphate carrier protein, mitochondrial	Slc25a3	0.189796	0.408612	0.819206
Q99M87	Q99M87	DnaJ homolog subfamily A member 3, mitochondrial	Dnaja3	0.190028	0.408612	0.569573
Q60864	Q60864	Stress-induced-phosphoprotein 1	Stip1	0.190389	0.408612	1.18728
Q3ULJ0;D3Z0L6	Q3ULJ0	Glycerol-3-phosphate dehydrogenase 1-like protein	Gpd1l	0.192735	0.412271	1.14899
Q9CRD0;A0A0J9YUB6;A0A0J9YUK7	Q9CRD0;A0A0J9YUB6;A0A0J9YUK7	OCIA domain-containing protein 1	Ociad1	0.193273	0.412271	1.8752
O88456;A0A0R4J1C2;A0A0R4IZW8;Q9D7J7	O88456;A0A0R4J1C2;A0A0R4IZW8	Calpain small subunit 1	Capns1	0.194641	0.412271	1.33985
P43277;P15864;P43275	P43277;P15864;P43275	Histone H1.3;Histone H1.2;Histone H1.1	Hist1h1d;Hist1h1c;Hist1h1a	0.194926	0.412271	0.276345
P62301;Q921R2;A0A0U1RQ71	P62301;Q921R2;A0A0U1RQ71	40S ribosomal protein S13	Rps13	0.19514	0.412271	0.550606
P07310	P07310	Creatine kinase M-type	Ckm	0.195464	0.412271	0.865911
P50752;K3W4R6;K3W4R7;Q6P3Z7;J3QQ13;A0A087WRX3;A0A087WQP1	P50752;K3W4R6;K3W4R7;Q6P3Z7;J3QQ13;A0A087WRX3	Troponin T, cardiac muscle	Tnnt2	0.196104	0.412436	0.886704
Q6ZWX6	Q6ZWX6	Eukaryotic translation initiation factor 2 subunit 1	Eif2s1	0.198028	0.413917	1.80489
Q8R1I1	Q8R1I1	Cytochrome b-c1 complex subunit 9	Uqcr10	0.198301	0.413917	0.760282
Q8CI94	Q8CI94	Glycogen phosphorylase, brain form	Pygb	0.198647	0.413917	0.889317
Q9CYT6;D3YTR7;A0A286YCS6	Q9CYT6;D3YTR7;A0A286YCS6	Adenylyl cyclase-associated protein 2;Adenylyl cyclase-associated protein	Cap2	0.199128	0.413917	0.391933
P62245;F8WJ41;D3YVB4;D3Z712	P62245;F8WJ41;D3YVB4;D3Z712	40S ribosomal protein S15a	Rps15a	0.199628	0.413917	0.464977
Q99KC8	Q99KC8	von Willebrand factor A domain-containing protein 5A	Vwa5a	0.207009	0.428013	1.68053
Q9D8N0	Q9D8N0	Elongation factor 1-gamma	Eef1g	0.21113	0.435052	1.19785
Q9D273;D3Z1G7	Q9D273;D3Z1G7	Cob(I)yrinic acid a,c-diamide adenosyltransferase, mitochondrial	Mmab	0.211613	0.435052	0.91897
Q9CXZ1;E9QPX3;A0A338P7A0	Q9CXZ1;E9QPX3;A0A338P7A0	NADH dehydrogenase [ubiquinone] iron-sulfur protein 4, mitochondrial	Ndufs4	0.212192	0.435052	0.309793
Q8K1M6;E9PUD2;A0A2U3TZ67	Q8K1M6;E9PUD2;A0A2U3TZ67	Dynamin-1-like protein	Dnm1l	0.212791	0.435065	0.882899
Q9JHI5	Q9JHI5	Isovaleryl-CoA dehydrogenase, mitochondrial	Ivd	0.214463	0.436435	0.819389
D3Z494;G5E895;S4R2G9	D3Z494;G5E895;S4R2G9		Akr1b10	0.215506	0.436435	0.845524
Q9CQQ7;A0A0G2JGX3	Q9CQQ7	ATP synthase F(0) complex subunit B1, mitochondrial	Atp5f1	0.215642	0.436435	0.85638
A0A0G2JFD8;A0A0G2JEX1;Q7TPW1;A0A0G2JGI1;A0A0G2JDY6;A0A0G2JG59;A0A0G2JDZ3;A0A0G2JFI0;A0A0G2JFT2;A0A0G2JDZ8	A0A0G2JFD8;A0A0G2JEX1;Q7TPW1;A0A0G2JGI1;A0A0G2JDY6;A0A0G2JG59	Nexilin	Nexn	0.215839	0.436435	1.57707
Q9CQC7	Q9CQC7	NADH dehydrogenase [ubiquinone] 1 beta subcomplex subunit 4	Ndufb4	0.217748	0.439086	0.859704
P10630;Q8BTU6;E9Q561;A0A338P6X5	P10630;Q8BTU6;E9Q561;A0A338P6X5	Eukaryotic initiation factor 4A-II;Eukaryotic initiation factor 4A-II, N-terminally processed	Eif4a2	0.220673	0.443511	0.69754
P05213;A0A2R8VHF3	P05213	Tubulin alpha-1B chain	Tuba1b	0.221151	0.443511	1.27069
P80318;E9Q133;Q3U0I3;F6ZVG8;F6Q609	P80318;E9Q133;Q3U0I3	T-complex protein 1 subunit gamma	Cct3	0.22239	0.444509	1.22114
Q8BKZ9	Q8BKZ9	Pyruvate dehydrogenase protein X component, mitochondrial	Pdhx	0.223396	0.444509	0.908725
P34884	P34884	Macrophage migration inhibitory factor	Mif	0.223956	0.444509	0.633383
Q9Z2U1;A0A0G2JF97	Q9Z2U1	Proteasome subunit alpha type-5	Psma5	0.224071	0.444509	1.75915
Q8BK30	Q8BK30	NADH dehydrogenase [ubiquinone] flavoprotein 3, mitochondrial	Ndufv3	0.230464	0.454908	0.370536
Q62261;A0A0A0MQG2;Q68FG2;Q91ZE6;E9PX29	Q62261;A0A0A0MQG2	Spectrin beta chain, non-erythrocytic 1	Sptbn1	0.230766	0.454908	1.11174
P13707;E0CXN5	P13707;E0CXN5	Glycerol-3-phosphate dehydrogenase [NAD(+)], cytoplasmic;Glycerol-3-phosphate dehydrogenase [NAD(+)]	Gpd1	0.231173	0.454908	1.12598
P62702;V9GWY0	P62702;V9GWY0	40S ribosomal protein S4, X isoform;40S ribosomal protein S4	Rps4x;Gm15013	0.231929	0.455176	1.49425
P63005;Q5SW16	P63005	Platelet-activating factor acetylhydrolase IB subunit alpha	Pafah1b1	0.234994	0.459962	1.47334
P46935;A0A571BDN7;Q8CFI0;A0A571BEP7;A0A494BAE4;A0A494B9L5;E9PXB7;G3X9H8;A0A494BA39;A0A494B9F0;A0A494B953;A0A494BAG2;A0A494BAX0	P46935;A0A571BDN7;Q8CFI0;A0A571BEP7;A0A494BAE4;A0A494B9L5;E9PXB7;G3X9H8;A0A494BA39;A0A494B9F0;A0A494B953;A0A494BAG2;A0A494BAX0	E3 ubiquitin-protein ligase NEDD4;E3 ubiquitin-protein ligase NEDD4-like	Nedd4;Nedd4l	0.236654	0.461478	0.692734
Q8BZA9;A0A0J9YV11	Q8BZA9;A0A0J9YV11	Fructose-2,6-bisphosphatase TIGAR	Tigar	0.237026	0.461478	1.30153
Q8R5L1;O35658	Q8R5L1;O35658	Complement component 1 Q subcomponent-binding protein, mitochondrial	C1qbp	0.238607	0.463326	1.43981
Q76MZ3;G3UWL2	Q76MZ3	Serine/threonine-protein phosphatase 2A 65 kDa regulatory subunit A alpha isoform	Ppp2r1a	0.241206	0.467095	1.1448
P97443;G5E8R7;Q8BMV4	P97443;G5E8R7	Histone-lysine N-methyltransferase Smyd1	Smyd1	0.24182	0.467095	1.48275
Q91VA7;A0A668KL51;V9GXV0	Q91VA7;A0A668KL51	Isocitrate dehydrogenase [NAD] subunit, mitochondrial	Idh3b	0.243406	0.468924	0.887129
Q6ZWY9;Q64478;P10853;P10854;Q64475;Q64525;Q8CGP2;Q8CGP1;Q8CBB6;Q9D2U9;Q8CGP0;Q64524;P70696	Q6ZWY9;Q64478;P10853;P10854;Q64475;Q64525;Q8CGP2;Q8CGP1;Q8CBB6;Q9D2U9;Q8CGP0;Q64524	Histone H2B type 1-C/E/G;Histone H2B type 1-H;Histone H2B type 1-F/J/L;Histone H2B type 1-M;Histone H2B type 1-B;Histone H2B type 2-B;Histone H2B type 1-P;Histone H2B type 1-K;Histone H2B;Histone H2B type 3-A;Histone H2B type 3-B;Histone H2B type 2-E	Hist1h2bc;Hist1h2bh;Hist1h2bf;Hist1h2bm;Hist1h2bb;Hist2h2bb;Hist1h2bp;Hist1h2bk;Hist1h2br;Hist3h2ba;Hist3h2bb;Hist2h2be	0.244992	0.470743	1.18764
Q9Z1N5;Q8VDW0;G3UXI6	Q9Z1N5;Q8VDW0;G3UXI6	Spliceosome RNA helicase Ddx39b;ATP-dependent RNA helicase DDX39A	Ddx39b;Ddx39a	0.245748	0.470964	1.25979
P26443;F7CFA5	P26443	Glutamate dehydrogenase 1, mitochondrial	Glud1	0.246893	0.471926	0.852561
Q9D9V3	Q9D9V3	Ethylmalonyl-CoA decarboxylase	Echdc1	0.248514	0.47379	1.67996
O08528;E9Q5B5;Q3TRM8;E9Q9M6;E9Q3Z4;E9Q8S8	O08528;E9Q5B5	Hexokinase-2;Hexokinase	Hk2	0.249487	0.474414	1.13548
P61971	P61971	Nuclear transport factor 2	Nutf2	0.251566	0.47713	1.22068
Q9CPU0;A0A494BAF7;A0A494BBE7;A0A494B970	Q9CPU0;A0A494BAF7;A0A494BBE7	Lactoylglutathione lyase	Glo1	0.252326	0.477147	0.772327
A2AMM0	A2AMM0	Muscle-related coiled-coil protein	Murc	0.252875	0.477147	0.84869
Q922R8;Q3TML0;F7DBQ0	Q922R8;Q3TML0;F7DBQ0	Protein disulfide-isomerase A6	Pdia6	0.253597	0.477282	1.90359
Q7TQI3;D3YWF6;D3Z7K0	Q7TQI3;D3YWF6	Ubiquitin thioesterase OTUB1	Otub1	0.254917	0.478539	1.11925
O08532;E9Q1X8;Q8C6Y3	O08532;E9Q1X8	Voltage-dependent calcium channel subunit alpha-2/delta-1;Voltage-dependent calcium channel subunit alpha-2-1;Voltage-dependent calcium channel subunit delta-1	Cacna2d1	0.256622	0.480512	0.709018
Q9CQR4	Q9CQR4	Acyl-coenzyme A thioesterase 13;Acyl-coenzyme A thioesterase 13, N-terminally processed	Acot13	0.259585	0.484823	2.83268
Q00897	Q00897	Alpha-1-antitrypsin 1-4	Serpina1d	0.261174	0.485036	1.68926
S4R2R5;Q8C8R3;S4R2F3;S4R2Q9;S4R1M4	S4R2R5;Q8C8R3;S4R2F3;S4R2Q9	Ankyrin-2	Ank2	0.261612	0.485036	0.698149
Q6PB66;F6V2A3	Q6PB66	Leucine-rich PPR motif-containing protein, mitochondrial	Lrpprc	0.261682	0.485036	0.916973
A2ASS6;A0A5K1VVQ9;A0A5K1VVQ1;F7CR78;Q8BUJ6	A2ASS6;A0A5K1VVQ9;A0A5K1VVQ1	Titin	Ttn	0.263131	0.486342	0.946391
Q8VDN2	Q8VDN2	Sodium/potassium-transporting ATPase subunit alpha-1	Atp1a1	0.263712	0.486342	0.884414
Q9ET54;D3Z1J5	Q9ET54;D3Z1J5	Palladin	Palld	0.265484	0.488383	0.569874
Q9WVE8;Q3UP40;A0A2R8W750;A0A2R8W6S4	Q9WVE8;Q3UP40;A0A2R8W750;A0A2R8W6S4	Protein kinase C and casein kinase substrate in neurons protein 2	Pacsin2	0.267204	0.489342	1.81163
P16858;A0A0A0MQF6;S4R257;A0A1D5RLD8;Q64467;S4R1W8;V9GXA7;V9GX06;A0A0R4J0X7;S4R2G5	P16858;A0A0A0MQF6;S4R257;A0A1D5RLD8	Glyceraldehyde-3-phosphate dehydrogenase	Gapdh	0.268229	0.489342	1.10928
Q62417;A0A286YCI8;D3Z5J3;A0A5F8MPJ2;E9PYX6;E9QNA7;A0A286YCQ0;A0A286YDN0;E9Q6A3;A0A286YD34;A0A286YCN8	Q62417;A0A286YCI8;D3Z5J3;A0A5F8MPJ2;E9PYX6;E9QNA7;A0A286YCQ0;A0A286YDN0;E9Q6A3	Sorbin and SH3 domain-containing protein 1	Sorbs1	0.26861	0.489342	0.935131
P40336;A0A1W2P7Z9	P40336;A0A1W2P7Z9	Vacuolar protein sorting-associated protein 26A	Vps26a	0.268671	0.489342	0.813645
D3Z7X0;D3Z2B3	D3Z7X0;D3Z2B3		Acad12	0.271146	0.492627	0.862349
P03911	P03911	NADH-ubiquinone oxidoreductase chain 4	Mtnd4	0.277674	0.50324	0.838472
Q3U2G2;Q61316	Q3U2G2;Q61316	Heat shock 70 kDa protein 4	Hspa4	0.280686	0.507447	1.08572
P47802;D3YVW0;G3XA66;Q8R5C0;A0A6I8MWZ8;G3UYJ5;G3XA75;D3Z3F4;G3UXX9	P47802;D3YVW0;G3XA66;Q8R5C0;A0A6I8MWZ8;G3UYJ5;G3XA75;D3Z3F4	Metaxin-1	Mtx1	0.282514	0.508457	0.614581
A3KG59	A3KG59	Peptidase M20 domain-containing protein 2	Pm20d2	0.28263	0.508457	1.68192
Q9CXJ4;F6ZFC5	Q9CXJ4	ATP-binding cassette sub-family B member 8, mitochondrial	Abcb8	0.285977	0.51131	0.823564
Q9ESB3;A0A0R4J039;A0A338P6H8	Q9ESB3;A0A0R4J039	Histidine-rich glycoprotein	Hrg	0.286266	0.51131	1.33027
P05064;A6ZI44;D3YWI1;D3Z510;A0A0U1RPN8;D3YV98;A0A0U1RPT5;Q9CPQ9;A6ZI46;A6ZI47;P05063	P05064;A6ZI44;D3YWI1;D3Z510;A0A0U1RPN8;D3YV98;A0A0U1RPT5	Fructose-bisphosphate aldolase A;Fructose-bisphosphate aldolase	Aldoa	0.28666	0.51131	0.918662
Q06890;E9Q9B8;E9PUU2;E9PXG5;E9Q8Y5;E9Q2G2	Q06890;E9Q9B8;E9PUU2;E9PXG5;E9Q8Y5	Clusterin;Clusterin beta chain;Clusterin alpha chain	Clu	0.287002	0.51131	1.4395
P27546;A0A0G2JDN7;E9PZ43;Q78TF3;A0A0G2JFT4;A0A0G2JG35;A0A140T8T5	P27546	Microtubule-associated protein 4	Map4	0.288485	0.511594	1.25282
Q811U4;F6XRI9	Q811U4;F6XRI9	Mitofusin-1	Mfn1	0.288556	0.511594	1.39364
Q9CXI0;F6X4L9	Q9CXI0	2-methoxy-6-polyprenyl-1,4-benzoquinol methylase, mitochondrial	Coq5	0.291457	0.515492	0.402255
Q60994;E9PWU4	Q60994	Adiponectin	Adipoq	0.29272	0.516482	0.922744
Q99LY9;B1ARW4	Q99LY9;B1ARW4	NADH dehydrogenase [ubiquinone] iron-sulfur protein 5;NADH dehydrogenase [ubiquinone] iron-sulfur protein 5, N-terminally processed	Ndufs5	0.295209	0.519254	0.875455
P25444;D3YVC1;D3YWJ3	P25444;D3YVC1;D3YWJ3	40S ribosomal protein S2	Rps2	0.296082	0.519254	1.21688
O35344;O35343;D3YTN1;A0A0B4J1E7	O35344;O35343;D3YTN1;A0A0B4J1E7	Importin subunit alpha-4;Importin subunit alpha-3	Kpna3;Kpna4	0.296718	0.519254	1.39039
P62259;F6WA09;D6REF3	P62259;F6WA09	14-3-3 protein epsilon	Ywhae	0.297431	0.519254	1.18947
P01027;CON__Q2UVX4;H3BL60;H3BKW9	P01027	Complement C3;Complement C3 beta chain;C3-beta-c;Complement C3 alpha chain;C3a anaphylatoxin;Acylation stimulating protein;Complement C3b alpha chain;Complement C3c alpha chain fragment 1;Complement C3dg fragment;Complement C3g fragment;Complement C3d fragment;Complement C3f fragment;Complement C3c alpha chain fragment 2	C3	0.297828	0.519254	1.38693
Q8VCM7;Q3UER8	Q8VCM7;Q3UER8	Fibrinogen gamma chain	Fgg	0.300603	0.522851	2.01385
P09411;S4R2M7;P09041	P09411;S4R2M7	Phosphoglycerate kinase 1;Phosphoglycerate kinase	Pgk1	0.302029	0.524088	0.912744
Q6PDN3;B1B1A8	Q6PDN3;B1B1A8	Myosin light chain kinase, smooth muscle;Myosin light chain kinase, smooth muscle, deglutamylated form	Mylk	0.30434	0.526352	1.80139
P23242	P23242	Gap junction alpha-1 protein	Gja1	0.304768	0.526352	0.479778
Q04447	Q04447	Creatine kinase B-type	Ckb	0.305635	0.52661	1.30717
P47791	P47791	Glutathione reductase, mitochondrial	Gsr	0.307602	0.528758	0.923756
P60867	P60867	40S ribosomal protein S20	Rps20	0.308329	0.528769	2.00144
O09161;F6QYE1;E9PZ67	O09161;F6QYE1;E9PZ67	Calsequestrin-2;Calsequestrin	Casq2	0.314159	0.537512	0.900694
P50247	P50247	Adenosylhomocysteinase	Ahcy	0.319163	0.544581	1.0954
Q9EP89;A0A1L1SVF9	Q9EP89;A0A1L1SVF9	Serine beta-lactamase-like protein LACTB, mitochondrial	Lactb	0.319775	0.544581	1.47481
Q9Z0S1;A0A1B0GRV0;D3Z5X0;D3Z0E6	Q9Z0S1;A0A1B0GRV0;D3Z5X0;D3Z0E6	3(2),5-bisphosphate nucleotidase 1	Bpnt1	0.324685	0.550377	1.52388
A6X935;E9Q5L2;E9PVD2;A0A2K6EDJ7	A6X935;E9Q5L2;E9PVD2;A0A2K6EDJ7	Inter alpha-trypsin inhibitor, heavy chain 4	Itih4	0.32484	0.550377	2.14959
E9Q3H6;A0A1W2P7G5;A0A1W2P7J1	E9Q3H6;A0A1W2P7G5;A0A1W2P7J1		Coq10a	0.326796	0.550377	0.815412
P0DP28;P0DP27;P0DP26;Q9D6P8	P0DP28;P0DP27;P0DP26;Q9D6P8	Calmodulin-like protein 3	Calml3	0.326949	0.550377	1.77348
Q4VAE3	Q4VAE3	Transmembrane protein 65	Tmem65	0.327312	0.550377	0.835988
Q91WS0	Q91WS0	CDGSH iron-sulfur domain-containing protein 1	Cisd1	0.327677	0.550377	0.950315
Q9D1L0;B2RPU8;D3Z5B1	Q9D1L0;B2RPU8;D3Z5B1	Coiled-coil-helix-coiled-coil-helix domain-containing protein 2	Chchd2;Zbed5	0.329001	0.551339	1.11861
Q8VDC0	Q8VDC0	Probable leucine--tRNA ligase, mitochondrial	Lars2	0.330933	0.553314	1.20084
Q9QUM9;E0CXB1;E0CYT2	Q9QUM9;E0CXB1	Proteasome subunit alpha type-6	Psma6	0.334598	0.55817	1.14083
Q8R1S0;D3YW66;D6RG57;F6ZE40	Q8R1S0;D3YW66	Ubiquinone biosynthesis monooxygenase COQ6, mitochondrial	Coq6	0.337575	0.561859	0.450272
Q5M8N4;A0A2I3BRL7;A0A2I3BQD5;A0A2I3BPM4;A0A2I3BQS7	Q5M8N4;A0A2I3BRL7	Epimerase family protein SDR39U1	Sdr39u1	0.33882	0.562655	0.677496
Q61171;D3Z4A4	Q61171;D3Z4A4	Peroxiredoxin-2	Prdx2	0.339777	0.562972	0.940502
P14131	P14131	40S ribosomal protein S16	Rps16	0.341046	0.563801	1.08506
Q9DBF1;G3UYR8;G3UY72;E9Q1H3	Q9DBF1;G3UYR8;G3UY72	Alpha-aminoadipic semialdehyde dehydrogenase	Aldh7a1	0.342886	0.565061	1.59356
Q9CZX8;D3YUT3;D3YUG3;D3Z5R8;D3Z722;S4R223	Q9CZX8;D3YUT3;D3YUG3;D3Z5R8;D3Z722;S4R223	40S ribosomal protein S19	Rps19	0.343348	0.565061	1.4666
Q9ES97	Q9ES97	Reticulon-3	Rtn3	0.345552	0.567417	1.53012
Q9CXD6	Q9CXD6	Mitochondrial calcium uniporter regulator 1	Mcur1	0.351136	0.575299	1.18556
Q9CQ73	Q9CQ73		Pkp2	0.352436	0.576142	1.12812
O70250	O70250	Phosphoglycerate mutase 2	Pgam2	0.357764	0.583553	0.909795
Q6XPS7	Q6XPS7		Tha1	0.359992	0.585885	0.853164
Q02257	Q02257	Junction plakoglobin	Jup	0.361114	0.586243	0.919957
Q505D7;A0A0U1RPB1	Q505D7;A0A0U1RPB1	Optic atrophy 3 protein homolog	Opa3	0.362331	0.586243	1.32211
Q8CHP8	Q8CHP8	Phosphoglycolate phosphatase	Pgp	0.362608	0.586243	0.647145
P14824;F8WIT2	P14824;F8WIT2	Annexin A6;Annexin	Anxa6	0.363593	0.586543	0.941409
Q9CPQ8	Q9CPQ8	ATP synthase subunit g, mitochondrial	Atp5l	0.367247	0.591139	0.928426
P11152	P11152	Lipoprotein lipase	Lpl	0.370356	0.59396	1.81798
P14685;F7B7L8	P14685	26S proteasome non-ATPase regulatory subunit 3	Psmd3	0.371308	0.59396	0.783739
P10922	P10922	Histone H1.0;Histone H1.0, N-terminally processed	H1f0	0.372108	0.59396	0.498052
Q8VE38;F6XLU3;F6SAD4;E9PZL5;E9Q690;E9Q8U8	Q8VE38	Oxidoreductase NAD-binding domain-containing protein 1	Oxnad1	0.372236	0.59396	0.745581
Q9CR62	Q9CR62	Mitochondrial 2-oxoglutarate/malate carrier protein	Slc25a11	0.374038	0.594364	0.791661
Q00898	Q00898	Alpha-1-antitrypsin 1-5	Serpina1e	0.374109	0.594364	2.05452
P68033;P62737;P63268;A0A494B9T3;D3YZY0;D3Z2K3;A0A1D5RM20;A0A0U1RQ96;F6WX90;E9Q2D1	P68033;P62737;P63268	Actin, alpha cardiac muscle 1;Actin, aortic smooth muscle;Actin, gamma-enteric smooth muscle	Actc1;Acta2;Actg2	0.375653	0.595527	0.921549
P0CG50;P0CG49;P62983;P62984;A0A0A6YW67;E9Q9J0;E9Q4P0;E9Q5F6;E9QNP0;Q5SX22	P0CG50;P0CG49;P62983;P62984;A0A0A6YW67;E9Q9J0;E9Q4P0;E9Q5F6;E9QNP0;Q5SX22	Polyubiquitin-C;Ubiquitin;Ubiquitin-related 1;Ubiquitin-related 2;Polyubiquitin-B;Ubiquitin;Ubiquitin-40S ribosomal protein S27a;Ubiquitin;40S ribosomal protein S27a;Ubiquitin-60S ribosomal protein L40;Ubiquitin;60S ribosomal protein L40	Ubc;Ubb;Rps27a;Uba52;Gm8797;Kxd1	0.378178	0.598239	0.482038
P61358;A2A4Q0	P61358;A2A4Q0	60S ribosomal protein L27	Rpl27	0.383227	0.604922	1.3733
Q3U422	Q3U422		Ndufv3	0.384282	0.605112	1.67458
Q3TMH2	Q3TMH2	Secernin-3	Scrn3	0.384996	0.605112	1.20493
Q9D020;A0A0N4SW80	Q9D020	Cytosolic 5-nucleotidase 3A	Nt5c3a	0.38874	0.605737	0.936177
Q9D6R2;A0A1L1STE6	Q9D6R2;A0A1L1STE6	Isocitrate dehydrogenase [NAD] subunit alpha, mitochondrial	Idh3a	0.388871	0.605737	0.921417
O35215	O35215	D-dopachrome decarboxylase	Ddt	0.38915	0.605737	0.377683
Q7TQ48	Q7TQ48	Sarcalumenin	Srl	0.389454	0.605737	0.906193
Q3UIZ8;D3Z630	Q3UIZ8;D3Z630	Myosin light chain kinase 3	Mylk3	0.38952	0.605737	0.92158
Q9DBP5;A0A0R4J093	Q9DBP5;A0A0R4J093	UMP-CMP kinase	Cmpk1	0.390793	0.606109	0.789156
P48758;Q8K354;A0A338P797;A0A338P684;A0A1B0GRG8	P48758;Q8K354;A0A338P797;A0A338P684;A0A1B0GRG8	Carbonyl reductase [NADPH] 1;Carbonyl reductase [NADPH] 3	Cbr1;Cbr3	0.391874	0.606109	0.570616
P62242	P62242	40S ribosomal protein S8	Rps8	0.392843	0.606109	0.847125
Q08857;A0A0G2JFB7	Q08857	Platelet glycoprotein 4	Cd36	0.393546	0.606109	0.899032
Q9JMA1;E9PYI8	Q9JMA1;E9PYI8	Ubiquitin carboxyl-terminal hydrolase 14;Ubiquitin carboxyl-terminal hydrolase	Usp14	0.393888	0.606109	1.21879
Q9R069;D3YTK7	Q9R069;D3YTK7	Basal cell adhesion molecule	Bcam	0.395419	0.607192	0.6029
Q8VDK1;D3YY53	Q8VDK1;D3YY53	Nitrilase homolog 1	Nit1	0.403818	0.618794	1.18855
P80313;A0A0N4SV00;A0A0N4SUI8	P80313;A0A0N4SV00	T-complex protein 1 subunit eta	Cct7	0.404875	0.619121	1.17139
P32020	P32020	Non-specific lipid-transfer protein	Scp2	0.406735	0.620673	0.900862
P15116;D3YYT0;P39038	P15116;D3YYT0	Cadherin-2	Cdh2	0.412949	0.628847	0.614239
P14115	P14115	60S ribosomal protein L27a	Rpl27a	0.417979	0.634871	0.753603
P58281;H7BX01;E0CXD1;F6U775	P58281;H7BX01;E0CXD1	Dynamin-like 120 kDa protein, mitochondrial;Dynamin-like 120 kDa protein, form S1	Opa1	0.418634	0.634871	1.05397
P17182;Q6PHC1;B1ARR7	P17182;Q6PHC1	Alpha-enolase	Eno1	0.420236	0.635987	1.10601
Q8R164	Q8R164	Valacyclovir hydrolase	Bphl	0.425032	0.640678	0.657764
P11983;F2Z483	P11983	T-complex protein 1 subunit alpha	Tcp1	0.425082	0.640678	1.12854
P70296;D6RHS6;D3Z1V4	P70296;D6RHS6;D3Z1V4	Phosphatidylethanolamine-binding protein 1;Hippocampal cholinergic neurostimulating peptide	Pebp1	0.429636	0.645577	0.911022
B1AYJ9;Q9CZ30	B1AYJ9;Q9CZ30	Obg-like ATPase 1	Ola1	0.430092	0.645577	1.33854
Q99LC3;A0A087WR38	Q99LC3	NADH dehydrogenase [ubiquinone] 1 alpha subcomplex subunit 10, mitochondrial	Ndufa10	0.431363	0.646164	0.927016
P54822;E9Q3T7;E9Q242;A0A140LHU1;E9Q0A0	P54822;E9Q3T7;E9Q242	Adenylosuccinate lyase	Adsl	0.433644	0.647116	0.914287
Q60668;E9Q5B6;F6ZV59;G5E8G0;G3X9W0;Q9D3U4;F6SHF3	Q60668;E9Q5B6;F6ZV59;G5E8G0;G3X9W0	Heterogeneous nuclear ribonucleoprotein D0	Hnrnpd	0.433761	0.647116	0.923214
Q64727	Q64727	Vinculin	Vcl	0.434811	0.647365	1.0813
P24527	P24527	Leukotriene A-4 hydrolase	Lta4h	0.439115	0.650637	0.898655
Q9QZQ8;Q8CCK0	Q9QZQ8	Core histone macro-H2A.1	H2afy	0.439673	0.650637	0.687351
P29758	P29758	Ornithine aminotransferase, mitochondrial	Oat	0.439697	0.650637	0.91431
E9PV24	E9PV24	Fibrinogen alpha chain;Fibrinopeptide A;Fibrinogen alpha chain	Fga	0.441297	0.650637	0.803765
P63001;Q3TLP8;P60764;A2AC13;Q05144;A0A2R8VHH0	P63001;Q3TLP8;P60764;A2AC13	Ras-related C3 botulinum toxin substrate 1;Ras-related C3 botulinum toxin substrate 3	Rac1;Rac3	0.44144	0.650637	1.14239
Q9WTP7;F6RP11	Q9WTP7;F6RP11	GTP:AMP phosphotransferase AK3, mitochondrial	Ak3	0.442614	0.65106	1.57238
Q9Z0X1;B1AU25	Q9Z0X1;B1AU25	Apoptosis-inducing factor 1, mitochondrial	Aifm1	0.444813	0.652368	0.922092
Q9CQN7	Q9CQN7	39S ribosomal protein L41, mitochondrial	Mrpl41	0.445281	0.652368	1.40103
P17563;Q63836;G3UYY2;A0A0R4J135;D6RHN2	P17563;Q63836;G3UYY2;A0A0R4J135	Selenium-binding protein 1;Selenium-binding protein 2	Selenbp1;Selenbp2	0.447143	0.65303	0.842024
P70333;O35737;Q8C2Q7	P70333;O35737;Q8C2Q7	Heterogeneous nuclear ribonucleoprotein H2;Heterogeneous nuclear ribonucleoprotein H;Heterogeneous nuclear ribonucleoprotein H, N-terminally processed	Hnrnph2;Hnrnph1	0.447512	0.65303	1.09461
Q8QZS1;E0CX19	Q8QZS1;E0CX19	3-hydroxyisobutyryl-CoA hydrolase, mitochondrial	Hibch	0.452316	0.65873	1.04483
Q00519	Q00519	Xanthine dehydrogenase/oxidase;Xanthine dehydrogenase;Xanthine oxidase	Xdh	0.455159	0.661559	1.23778
Q925I1;H3BK90;H3BKI6	Q925I1;H3BK90	ATPase family AAA domain-containing protein 3	Atad3;Atad3a	0.457165	0.661987	0.947759
D3YVV9;Q91YE8;E9Q1U2;A0A498WGE8	D3YVV9;Q91YE8;E9Q1U2	Synaptopodin-2	Synpo2	0.458431	0.661987	0.891724
P56395;G5E850;E0CY88;A0A494B9D8	P56395;G5E850;E0CY88	Cytochrome b5	Cyb5a	0.459465	0.661987	0.779599
Q9D0S9	Q9D0S9	Histidine triad nucleotide-binding protein 2, mitochondrial	Hint2	0.459583	0.661987	0.44782
P21107;A0A0R4J1P2;E9Q5J9	P21107;A0A0R4J1P2;E9Q5J9	Tropomyosin alpha-3 chain	Tpm3	0.460134	0.661987	2.54046
E9Q9T8;Q3UIK0;Q3TF37;O70468	E9Q9T8;Q3UIK0;Q3TF37;O70468	Myosin-binding protein C, cardiac-type	Mybpc3	0.460866	0.661987	0.936206
P62806	P62806	Histone H4	Hist1h4a	0.469685	0.67237	0.847581
P28474;Q64437	P28474;Q64437	Alcohol dehydrogenase class-3;Alcohol dehydrogenase class 4 mu/sigma chain	Adh5;Adh7	0.469926	0.67237	0.936388
Q5EBG6	Q5EBG6	Heat shock protein beta-6	Hspb6	0.47173	0.673637	1.11778
P45591;A0A1Y7VJ71	P45591	Cofilin-2	Cfl2	0.474375	0.674431	1.7372
O55023;Q924B0;Q80ZJ2;D3Z703;A0A0A6YW07	O55023;Q924B0;Q80ZJ2	Inositol monophosphatase 1	Impa1	0.474519	0.674431	1.40935
P42932;H3BL49;H3BJB6;H3BLL1;H3BKG2;H3BKR8	P42932;H3BL49;H3BJB6	T-complex protein 1 subunit theta	Cct8	0.475042	0.674431	1.09414
P99027;A0A5F8MPY2	P99027;A0A5F8MPY2	60S acidic ribosomal protein P2	Rplp2	0.476544	0.675258	0.902089
O88569;A0A0N4SUM2	O88569;A0A0N4SUM2	Heterogeneous nuclear ribonucleoproteins A2/B1	Hnrnpa2b1	0.483651	0.683505	0.952738
Q9R0P5	Q9R0P5	Destrin	Dstn	0.484327	0.683505	1.79494
Q9CPR4;Q6ZWZ7;B2RY53	Q9CPR4;Q6ZWZ7;B2RY53	60S ribosomal protein L17	Rpl17;Gm6133	0.485158	0.683505	1.40698
Q91VK1;Q9CQC6;A0A1Y7VKZ4;A0A087WQS2	Q91VK1	Basic leucine zipper and W2 domain-containing protein 2	Bzw2	0.487162	0.684457	0.796256
Q8BYM8;A0A1B0GSP2;A0A1B0GR87;G3X975	Q8BYM8;A0A1B0GSP2;A0A1B0GR87;G3X975	Probable cysteine--tRNA ligase, mitochondrial	Cars2	0.488074	0.684457	0.889799
Q8CGC7	Q8CGC7	Bifunctional glutamate/proline--tRNA ligase;Glutamate--tRNA ligase;Proline--tRNA ligase	Eprs	0.489253	0.684457	0.638319
Q8CAQ8;E9Q800;E9QAY6;A0A0U1RP81;A0A1B0GX08;A0A0U1RQ14;E9PVS5	Q8CAQ8;E9Q800;E9QAY6;A0A0U1RP81	MICOS complex subunit Mic60	Immt	0.489697	0.684457	0.947543
P61294;P35279;Q8BHD0;A0A1L1SRS6;D3YV69	P61294;P35279;Q8BHD0;A0A1L1SRS6;D3YV69	Ras-related protein Rab-6B;Ras-related protein Rab-6A;Ras-related protein Rab-39A	Rab6b;Rab6a;Rab39a	0.490497	0.684457	0.657377
P10493	P10493	Nidogen-1	Nid1	0.491665	0.684785	0.905863
Q9CRB9;S4R238;Q9D9P1;D3Z0L4;F6QFL0	Q9CRB9;S4R238;Q9D9P1;D3Z0L4	MICOS complex subunit Mic19	Chchd3	0.499065	0.693776	0.933592
Q9Z0N2	Q9Z0N2	Eukaryotic translation initiation factor 2 subunit 3, Y-linked	Eif2s3y	0.500368	0.694272	0.857935
P09405	P09405	Nucleolin	Ncl	0.501795	0.694635	1.06204
Q8BFP9	Q8BFP9	[Pyruvate dehydrogenase (acetyl-transferring)] kinase isozyme 1, mitochondrial	Pdk1	0.502522	0.694635	1.15809
P11499;E9Q3D6;E9PX27;D3Z1R1;E9Q0C3	P11499	Heat shock protein HSP 90-beta	Hsp90ab1	0.506674	0.696875	1.06366
Q9JJW5	Q9JJW5	Myozenin-2	Myoz2	0.507474	0.696875	0.945286
Q5SX39	Q5SX39	Myosin-4	Myh4	0.507827	0.696875	5.74471
Q91X72;A0A1B0GS57	Q91X72	Hemopexin	Hpx	0.50794	0.696875	1.29922
Q9WV60;E9QAQ5;Q2NL51;D3Z7E5	Q9WV60;E9QAQ5	Glycogen synthase kinase-3 beta	Gsk3b	0.509085	0.697142	0.921606
J3QQ16;A0A087WS16;E9PWQ3;D3YWD1	J3QQ16;A0A087WS16;E9PWQ3;D3YWD1		Col6a3	0.511832	0.699598	1.17238
Q7TMK9;G3UZ48;G3UZI2;A0A0R4J259;G3V018;Q8VHM5;A2AW41;F7B5B5;G3UWM1;G3UXJ6;G3UXU5;S4R1E9	Q7TMK9;G3UZ48;G3UZI2;A0A0R4J259;G3V018;Q8VHM5;A2AW41;F7B5B5;G3UWM1;G3UXJ6	Heterogeneous nuclear ribonucleoprotein Q	Syncrip;Hnrnpr	0.515408	0.703178	0.876566
P58771;Q8BSH3;Q8BP43;E9Q452;E9Q454;E9Q450;S4R2U0;E9Q456	P58771;Q8BSH3;Q8BP43;E9Q452;E9Q454;E9Q450;S4R2U0	Tropomyosin alpha-1 chain	Tpm1	0.518772	0.706454	0.895021
Q9QYG0;A0A2I3BPW0;A0A2I3BS20;A0A2I3BQM5;A0A2I3BPL1;A0A2I3BQR5	Q9QYG0;A0A2I3BPW0;A0A2I3BS20;A0A2I3BQM5;A0A2I3BPL1;A0A2I3BQR5	Protein NDRG2	Ndrg2	0.522059	0.708487	0.908797
P23506;F7D432;E9PWE0;E0CYV0;F6V9F1;F6TXE3	P23506;F7D432;E9PWE0;E0CYV0;F6V9F1	Protein-L-isoaspartate(D-aspartate) O-methyltransferase;Protein-L-isoaspartate O-methyltransferase	Pcmt1	0.523086	0.708487	1.11024
Q8K4G5;E9Q9C1;E9QK41;E9Q9C4;E9Q9C7;E9Q9C0;E9Q9C2;E9Q9D2;E9Q030;F6YHE5;E9Q9Q7;E9Q9D1	Q8K4G5;E9Q9C1;E9QK41;E9Q9C4;E9Q9C7;E9Q9C0;E9Q9C2;E9Q9D2;E9Q030	Actin-binding LIM protein 1	Ablim1	0.523161	0.708487	0.946437
P34914;A8JYK8	P34914;A8JYK8	Bifunctional epoxide hydrolase 2;Cytosolic epoxide hydrolase 2;Lipid-phosphate phosphatase	Ephx2	0.529275	0.71509	1.08268
Q64433;Q9JI95	Q64433;Q9JI95	10 kDa heat shock protein, mitochondrial	Hspe1;Cpn10-rs1	0.529985	0.71509	1.15128
O54931;A2API8;F7AA26;A2APJ1;A0A5F8MPZ6	O54931;A2API8;F7AA26;A2APJ1;A0A5F8MPZ6	A-kinase anchor protein 2	Akap2;Pakap	0.531665	0.716041	1.15272
O55111;Q8VCE3;Q811I1	O55111	Desmoglein-2	Dsg2	0.535016	0.718703	0.778854
Q9QUH0;A0A1Y7VM65	Q9QUH0;A0A1Y7VM65	Glutaredoxin-1	Glrx	0.5356	0.718703	1.14063
Q61292;A0A0A6YWY6;A0A0A6YWI2;A0A0A6YY71	Q61292	Laminin subunit beta-2	Lamb2	0.539767	0.722973	1.06527
Q80UG5;A2A6U3;A2A6U5	Q80UG5;A2A6U3;A2A6U5	Septin-9	Sept9	0.542455	0.725249	1.17612
Q64105;G3UXX3;Q91XH5;G3UZ79	Q64105;G3UXX3;Q91XH5;G3UZ79	Sepiapterin reductase	Spr	0.546299	0.727468	0.951988
Q60930;G3UX26;A0A286YCR8;D3YZT5;D3YUN8	Q60930;G3UX26;A0A286YCR8;D3YZT5	Voltage-dependent anion-selective channel protein 2	Vdac2	0.546965	0.727468	1.05326
Q9Z2Z6	Q9Z2Z6	Mitochondrial carnitine/acylcarnitine carrier protein	Slc25a20	0.547088	0.727468	0.901633
Q9D358;Q561M1;A0A1W2P7X3	Q9D358;Q561M1;A0A1W2P7X3	Low molecular weight phosphotyrosine protein phosphatase	Acp1	0.548665	0.728246	1.45607
Q8BLF1;Q8BYQ0	Q8BLF1;Q8BYQ0	Neutral cholesterol ester hydrolase 1	Nceh1	0.552021	0.731378	1.36771
P97371;G3UXZ5;G3UXY0;G3UWN9;G3X9K9;G3UXR1	P97371;G3UXZ5;G3UXY0;G3UWN9;G3X9K9	Proteasome activator complex subunit 1	Psme1	0.557347	0.737103	0.957309
A8DUK4;P02088;E9Q223;P02089;CON__Q3SX09;CON__P02070	A8DUK4;P02088;E9Q223	Hemoglobin subunit beta-1	Hbbt1;Hbb-b1;Hbb-bs	0.559706	0.737697	0.935787
Q9D0F9;A2CEK3	Q9D0F9;A2CEK3	Phosphoglucomutase-1	Pgm1;Pgm2	0.559806	0.737697	0.962509
E9Q8Q6;A2AST1	E9Q8Q6;A2AST1		Ccdc141	0.563612	0.741382	1.18866
Q6PHQ9;Q91YZ8;A3KFU5;A3KFU8;Q62029;V9GXG3;Q9D4E6;A0A2I3BR37	Q6PHQ9;Q91YZ8;A3KFU5;A3KFU8	Polyadenylate-binding protein	Pabpc4	0.566004	0.743196	1.06823
Q93092;A0A1B0GR11	Q93092;A0A1B0GR11	Transaldolase	Taldo1	0.571653	0.749158	1.0544
Q8CHT0	Q8CHT0	Delta-1-pyrroline-5-carboxylate dehydrogenase, mitochondrial	Aldh4a1	0.572585	0.749158	0.923567
Q9R0Y5;Z4YN97;A0A0A6YXW8	Q9R0Y5;Z4YN97;A0A0A6YXW8	Adenylate kinase isoenzyme 1	Ak1	0.574562	0.750406	0.85144
A0A0R4J083;P51174	A0A0R4J083;P51174	Long-chain specific acyl-CoA dehydrogenase, mitochondrial	Acadl	0.577877	0.753395	0.930023
P51667;E9Q8Y0;F6RBQ5	P51667;E9Q8Y0;F6RBQ5	Myosin regulatory light chain 2, ventricular/cardiac muscle isoform	Myl2	0.58076	0.755811	0.844482
Q02248;E9Q6A9;F6QZ47;F7BAC9;F7CRC6;D3YUH4	Q02248;E9Q6A9	Catenin beta-1	Ctnnb1	0.583775	0.75839	0.821618
P56565;Q91V77	P56565;Q91V77	Protein S100-A1;Protein S100	S100a1	0.585974	0.759903	1.51988
P14148;F6XI62	P14148;F6XI62	60S ribosomal protein L7	Rpl7	0.587922	0.761085	1.19462
Q9D6U8;A0A338P6X2	Q9D6U8;A0A338P6X2	Protein FAM162A	Fam162a	0.590105	0.761492	0.767387
Q9QXS1;E9Q3W4;A0A3B2W7J8;A0A0R4J218;A0A0R4J223;E9Q9J6;A0A0R4J221;E9PW24	Q9QXS1;E9Q3W4;A0A3B2W7J8	Plectin	Plec	0.590312	0.761492	0.943165
Q8K411	Q8K411	Presequence protease, mitochondrial	Pitrm1	0.594165	0.763864	0.904726
P21550;Q5SX59;Q5SX60;Q5SX61;J3QPZ9	P21550;Q5SX59	Beta-enolase;Enolase	Eno3	0.594232	0.763864	0.948361
P62631	P62631	Elongation factor 1-alpha 2	Eef1a2	0.597655	0.766921	1.04491
P47962;D3YYV8	P47962;D3YYV8	60S ribosomal protein L5	Rpl5	0.599507	0.76721	0.718802
P48962	P48962	ADP/ATP translocase 1	Slc25a4	0.599971	0.76721	0.967437
Q9CPY7;A0A0G2JEM7	Q9CPY7	Cytosol aminopeptidase	Lap3	0.604748	0.769262	1.06394
Q64669	Q64669	NAD(P)H dehydrogenase [quinone] 1	Nqo1	0.604832	0.769262	1.06338
P48787;D3Z160;D3YXP5;A0A140LIV0	P48787	Troponin I, cardiac muscle	Tnni3	0.606822	0.769262	0.963814
Q9DCS9;D3YUK4	Q9DCS9;D3YUK4	NADH dehydrogenase [ubiquinone] 1 beta subcomplex subunit 10	Ndufb10	0.607153	0.769262	0.885324
P22315;F6T2S0;A0A494BAI5;Q544X6;Q91W09;A0A494B9Y8;A0A494BAR8;A0A494BBL4	P22315;F6T2S0;A0A494BAI5;Q544X6;Q91W09;A0A494B9Y8	Ferrochelatase, mitochondrial;Ferrochelatase	Fech	0.607252	0.769262	0.922807
Q8CIB5;A6X941	Q8CIB5	Fermitin family homolog 2	Fermt2	0.607864	0.769262	1.0463
Q99L13	Q99L13	3-hydroxyisobutyrate dehydrogenase, mitochondrial	Hibadh	0.61323	0.774718	0.83622
Q71LX4;E9PUM4;A0A1L1SQ51;Q8CDM9;A0A1L1SRI1;A0A1L1SQP9	Q71LX4;E9PUM4;A0A1L1SQ51;Q8CDM9;A0A1L1SRI1;A0A1L1SQP9	Talin-2	Tln2	0.614895	0.775487	1.05044
P37804;A0A1L1STN8	P37804;A0A1L1STN8	Transgelin	Tagln	0.622537	0.781758	0.823815
P24472;A0A1L1SS61	P24472	Glutathione S-transferase A4	Gsta4	0.623045	0.781758	0.952955
Q8R127;J3QNN5;F6S0R8	Q8R127;J3QNN5	Saccharopine dehydrogenase-like oxidoreductase	Sccpdh	0.623319	0.781758	1.11036
P61082;F7CDT0;F6WMC0;G5E919	P61082;F7CDT0;F6WMC0	NEDD8-conjugating enzyme Ubc12	Ube2m	0.624128	0.781758	0.703997
O88844;A0A087WPT4;A0A087WRS9	O88844	Isocitrate dehydrogenase [NADP] cytoplasmic	Idh1	0.626134	0.782934	1.43012
Q9D0M3;A0A2R8VHK1	Q9D0M3;A0A2R8VHK1	Cytochrome c1, heme protein, mitochondrial	Cyc1	0.634222	0.791521	0.954009
Q61838	Q61838	Alpha-2-macroglobulin;Alpha-2-macroglobulin 165 kDa subunit;Alpha-2-macroglobulin 35 kDa subunit	A2m	0.63576	0.791521	1.08992
Q99LP6	Q99LP6	GrpE protein homolog 1, mitochondrial	Grpel1	0.636236	0.791521	1.06861
P62852;A0A1L1SQA8	P62852;A0A1L1SQA8	40S ribosomal protein S25	Rps25	0.63865	0.79318	1.06441
Q6ZQ73	Q6ZQ73	Cullin-associated NEDD8-dissociated protein 2	Cand2	0.641898	0.795867	0.915235
Q9QYB1	Q9QYB1	Chloride intracellular channel protein 4	Clic4	0.646676	0.800438	1.306
Q9D819	Q9D819	Inorganic pyrophosphatase	Ppa1	0.647766	0.800438	1.08886
P62827;Q14AA6;Q61820	P62827;Q14AA6;Q61820	GTP-binding nuclear protein Ran;GTP-binding nuclear protein Ran, testis-specific isoform	Ran;1700009N14Rik;Rasl2-9	0.652474	0.801893	0.961
Q60932;F2Z471	Q60932;F2Z471	Voltage-dependent anion-selective channel protein 1	Vdac1	0.653186	0.801893	1.05003
Q8CGK3	Q8CGK3	Lon protease homolog, mitochondrial	Lonp1	0.653264	0.801893	0.935324
P56391;A0A140LIU3	P56391;A0A140LIU3	Cytochrome c oxidase subunit 6B1	Cox6b1	0.653774	0.801893	0.914366
P35505;D3Z2R9	P35505;D3Z2R9	Fumarylacetoacetase	Fah	0.656806	0.801893	0.781171
P99028	P99028	Cytochrome b-c1 complex subunit 6, mitochondrial	Uqcrh	0.65763	0.801893	0.806673
Q9WTR5	Q9WTR5	Cadherin-13	Cdh13	0.658538	0.801893	0.944687
Q9D8E6	Q9D8E6	60S ribosomal protein L4	Rpl4	0.659069	0.801893	1.08795
Q6P9R2	Q6P9R2	Serine/threonine-protein kinase OSR1	Oxsr1	0.662036	0.801893	0.802453
P61089;A0A1W2P7Z3;Q9CQ37;A0A087WPV1	P61089;A0A1W2P7Z3	Ubiquitin-conjugating enzyme E2 N	Ube2n	0.662387	0.801893	0.965146
O70433	O70433	Four and a half LIM domains protein 2	Fhl2	0.662756	0.801893	0.952678
P03921	P03921	NADH-ubiquinone oxidoreductase chain 5	Mtnd5	0.663014	0.801893	0.918748
Q9CZB0;F8WGB3;D3Z1A8	Q9CZB0;F8WGB3	Succinate dehydrogenase cytochrome b560 subunit, mitochondrial	Sdhc	0.663888	0.801893	0.691985
Q8BWB1;D3YU08;B2RQK7	Q8BWB1;D3YU08;B2RQK7	Synaptopodin 2-like protein	Synpo2l	0.665142	0.801893	1.1839
E9QQ96;A2AAJ9;Z4YJE4;A0A1W2P6H1;H7BX05;J9JIB2	E9QQ96;A2AAJ9;Z4YJE4;A0A1W2P6H1;H7BX05	Obscurin	Obscn	0.66533	0.801893	1.04062
P11404	P11404	Fatty acid-binding protein, heart	Fabp3	0.666975	0.802556	0.874215
P61087;A0A0J9YUI1;D3Z4U3;F8WIC2	P61087;A0A0J9YUI1;D3Z4U3	Ubiquitin-conjugating enzyme E2 K	Ube2k	0.668239	0.802762	0.963377
Q9Z2U0;A0A338P7D7;Q9CWH6;B7ZMS4	Q9Z2U0;A0A338P7D7;Q9CWH6	Proteasome subunit alpha type-7;Proteasome subunit alpha type-7-like	Psma7;Psma8	0.674156	0.806841	1.37158
P51660	P51660	Peroxisomal multifunctional enzyme type 2;(3R)-hydroxyacyl-CoA dehydrogenase;Enoyl-CoA hydratase 2	Hsd17b4	0.675419	0.806841	0.945296
Q8K0Z7	Q8K0Z7	Translational activator of cytochrome c oxidase 1	Taco1	0.675551	0.806841	1.04524
P14094;A0A0A6YX05	P14094;A0A0A6YX05	Sodium/potassium-transporting ATPase subunit beta-1	Atp1b1	0.676372	0.806841	0.950589
Q922J3;D3Z3M7;D3Z2Z1;F8WIA1;Q8C0S5;F6RCU2;F6RAY2;F7CB97	Q922J3;D3Z3M7;D3Z2Z1;F8WIA1;Q8C0S5;F6RCU2	CAP-Gly domain-containing linker protein 1	Clip1	0.677202	0.806841	1.04999
P50171;A0A494BA51;A0A494BAF4;G3UX44	P50171;A0A494BA51;A0A494BAF4;G3UX44	Estradiol 17-beta-dehydrogenase 8	Hsd17b8;H2-Ke6	0.679225	0.806841	0.675317
P52503;A0A1Y7VM38;A0A1Y7VKP8;D6RJ54	P52503;A0A1Y7VM38;A0A1Y7VKP8	NADH dehydrogenase [ubiquinone] iron-sulfur protein 6, mitochondrial	Ndufs6	0.679343	0.806841	0.905711
E9PZ16;B1B0C7;Q05793;A0A571BD72	E9PZ16;B1B0C7;Q05793	Basement membrane-specific heparan sulfate proteoglycan core protein;Endorepellin;LG3 peptide	Hspg2	0.680428	0.806841	1.03942
Q9D6K8	Q9D6K8	FUN14 domain-containing protein 2	Fundc2	0.684434	0.810281	0.77896
Q3THW5;P0C0S6;P27661;A0A0N4SV66;C0HKE3;C0HKE2;C0HKE1;Q8R029;C0HKE5;C0HKE7;C0HKE8;C0HKE6;C0HKE9;C0HKE4;Q8CGP5;Q8CGP6;Q8CGP4;Q8BFU2;Q8CGP7;Q64523;Q8R1M2;Q6GSS7;Q3UA95;G3UWL7;Q64522	Q3THW5;P0C0S6;P27661;A0A0N4SV66;C0HKE3;C0HKE2;C0HKE1;Q8R029;C0HKE5;C0HKE7;C0HKE8;C0HKE6;C0HKE9;C0HKE4;Q8CGP5;Q8CGP6;Q8CGP4;Q8BFU2;Q8CGP7;Q64523;Q8R1M2;Q6GSS7;Q3UA95	Histone H2A.V;Histone H2A.Z;Histone H2AX;Histone H2A;Histone H2A type 1-F;Histone H2A type 1-H;Histone H2A type 3;Histone H2A type 1-K;Histone H2A type 2-C;Histone H2A.J;Histone H2A type 2-A	H2afv;H2afz;H2afx;Hist1h2af;Hist1h2ah;Hist1h2aa;Hist3h2a;Hist1h2ak;Hist2h2ac;H2afj;Hist2h2aa1	0.688901	0.814256	1.06807
Q61035;Q99KK9;G5E823;A0A494B9A1	Q61035;Q99KK9;G5E823	Histidine--tRNA ligase, cytoplasmic;Probable histidine--tRNA ligase, mitochondrial	Hars;Hars2	0.693917	0.8179	1.2067
Q9DCJ5	Q9DCJ5	NADH dehydrogenase [ubiquinone] 1 alpha subcomplex subunit 8	Ndufa8	0.694212	0.8179	0.847882
P19783;M0QWX7	P19783	Cytochrome c oxidase subunit 4 isoform 1, mitochondrial	Cox4i1	0.701105	0.823201	1.04911
P14869;S4R1N1;D3YVM5	P14869;S4R1N1;D3YVM5	60S acidic ribosomal protein P0	Rplp0	0.701663	0.823201	1.04628
P00405	P00405	Cytochrome c oxidase subunit 2	Mtco2	0.702076	0.823201	0.836847
V9GXP3;V9GWW6;V9GX17;B7ZMP8;V9GXW5	V9GXP3;V9GWW6;V9GX17;B7ZMP8		Mlip	0.707111	0.827783	0.888936
Q9QXX4	Q9QXX4	Calcium-binding mitochondrial carrier protein Aralar2	Slc25a13	0.709961	0.829795	1.03293
Q9D5T0;A0A494BAB5;A0A494B9L7;A0A494B9Y0	Q9D5T0;A0A494BAB5;A0A494B9L7;A0A494B9Y0	ATPase family AAA domain-containing protein 1	Atad1	0.71568	0.83515	0.947685
Q9CY64;A2ASB8;A2ASB7;A2ASB1	Q9CY64	Biliverdin reductase A	Blvra	0.718524	0.837137	1.16041
O88441	O88441	Metaxin-2	Mtx2	0.72393	0.842099	1.04311
Q8BH64;D3Z7U7	Q8BH64	EH domain-containing protein 2	Ehd2	0.728977	0.846628	0.963742
Q02566;A0A2I3BPY4;A2AQP0;Q1WNP4;B8JJH3	Q02566	Myosin-6	Myh6	0.736058	0.85075	0.921638
Q6R0H7;Z4YKV1;P63094;A0A571BEI3;A0A571BEM2;P18872;Q8C040;A0A571BE25;Q8BHK8;A2AE32;A2A610;Q66L47;Q3V3I2;P50149;P20612;Q8CGK7;Q9DC51;A2AE31	Q6R0H7;Z4YKV1;P63094;A0A571BEI3;A0A571BEM2	Guanine nucleotide-binding protein G(s) subunit alpha isoforms XLas;Guanine nucleotide-binding protein G(s) subunit alpha isoforms short	Gnas	0.736441	0.85075	1.04407
P55264;A0A286YCD7;A0A286YCN3	P55264;A0A286YCD7;A0A286YCN3	Adenosine kinase	Adk	0.736558	0.85075	0.96783
P15626;D3YX76;Q8R5I6	P15626;D3YX76	Glutathione S-transferase Mu 2	Gstm2	0.737674	0.85075	0.964269
P04919	P04919	Band 3 anion transport protein	Slc4a1	0.738321	0.85075	1.0624
P52480;A0A1L1SU37;A0A1L1SQV8;A0A1L1SUV0;A0A1L1SSN6;A0A1L1STV8;A0A1L1ST52;P53657;A0A1L1SVH2;E9Q509;G3X925	P52480;A0A1L1SU37	Pyruvate kinase PKM	Pkm	0.740326	0.851723	0.970544
P97742;A0A494BAD3;A0A494BBF2;A0A494BAC7	P97742;A0A494BAD3	Carnitine O-palmitoyltransferase 1, liver isoform	Cpt1a	0.741729	0.852001	1.11646
Q9D0K2;Q3UJQ9	Q9D0K2;Q3UJQ9	Succinyl-CoA:3-ketoacid coenzyme A transferase 1, mitochondrial;Succinyl-CoA:3-ketoacid-coenzyme A transferase	Oxct1	0.751042	0.860273	1.02771
Q924M7;F6Q3K8	Q924M7	Mannose-6-phosphate isomerase	Mpi	0.751274	0.860273	1.02743
P61982	P61982	14-3-3 protein gamma;14-3-3 protein gamma, N-terminally processed	Ywhag	0.757152	0.865654	1.47755
P62270;F6YVP7;A0A1Y7VKY1;S4R1N6;A0A3Q4EGP3	P62270;F6YVP7;A0A1Y7VKY1;S4R1N6	40S ribosomal protein S18	Rps18;Gm10260	0.759053	0.866477	1.07902
Q8BFR5;A0A0U1RNQ6;A0A0U1RPC4	Q8BFR5	Elongation factor Tu, mitochondrial	Tufm	0.760605	0.866901	0.978782
Q80XL6;A0A0R4J0I6;A0A087WSI8;D3YTQ5;F6U473	Q80XL6;A0A0R4J0I6;A0A087WSI8;D3YTQ5	Acyl-CoA dehydrogenase family member 11	Acad11	0.763417	0.868757	0.972113
A0A0N4SVK8;Q8BGK2;E9Q4C0;E9Q333	A0A0N4SVK8;Q8BGK2;E9Q4C0	[Protein ADP-ribosylarginine] hydrolase-like protein 1	Adprhl1	0.766895	0.871363	1.03399
P62869;A0A3B2WBM3	P62869;A0A3B2WBM3	Transcription elongation factor B polypeptide 2	Tceb2	0.768444	0.871774	1.18701
Q91VB8;P01942	Q91VB8;P01942	Hemoglobin subunit alpha	haemaglobin alpha 2;Hba	0.772511	0.875036	0.959174
Q62234;Z4YJF5;A0A3B2W4I4	Q62234;Z4YJF5	Myomesin-1	Myom1	0.774935	0.876429	0.986305
Q922D8;A0A1W2P733;A0A1W2P7L5	Q922D8;A0A1W2P733	C-1-tetrahydrofolate synthase, cytoplasmic;Methylenetetrahydrofolate dehydrogenase;Methenyltetrahydrofolate cyclohydrolase;Formyltetrahydrofolate synthetase;C-1-tetrahydrofolate synthase, cytoplasmic, N-terminally processed	Mthfd1	0.776541	0.876798	0.957112
Q9WVA2;Q4FZG7	Q9WVA2	Mitochondrial import inner membrane translocase subunit Tim8 A	Timm8a1	0.77765	0.876798	0.975865
Q8CC88	Q8CC88	von Willebrand factor A domain-containing protein 8	Vwa8	0.794734	0.894138	0.975378
Q8BIJ6;E9PWN2;E9PWN3	Q8BIJ6;E9PWN2	Isoleucine--tRNA ligase, mitochondrial	Iars2	0.795466	0.894138	0.965087
E9QK48;Q7TNG5;D6RGM3	E9QK48;Q7TNG5;D6RGM3	Echinoderm microtubule-associated protein-like 2	Eml2	0.797697	0.895274	1.13263
O08709;Q6GT24;D3Z0Y2;Q8BG37;A0A0A6YXQ7	O08709;Q6GT24;D3Z0Y2	Peroxiredoxin-6	Prdx6	0.800921	0.8965	1.02588
Q9Z2W0;Q8BPW9;Q3TVK3;A0A087WS31;A0A087WSE6;A0A087WNX3;A0A087WSD3;A0A087WRC1	Q9Z2W0;Q8BPW9;Q3TVK3	Aspartyl aminopeptidase	Dnpep	0.801231	0.8965	1.0322
Q60597;Z4YJV4;Q5SVY0;Q5SVY1	Q60597;Z4YJV4	2-oxoglutarate dehydrogenase, mitochondrial	Ogdh	0.808148	0.902862	0.974282
Q924X2;F6QXT4	Q924X2	Carnitine O-palmitoyltransferase 1, muscle isoform	Cpt1b	0.811107	0.904792	1.0205
Q9Z2I0	Q9Z2I0	LETM1 and EF-hand domain-containing protein 1, mitochondrial	Letm1	0.81276	0.905259	0.98154
Q9JI91;A0A1Y7VMW4	Q9JI91	Alpha-actinin-2	Actn2	0.814432	0.905747	1.04407
Q99LC5	Q99LC5	Electron transfer flavoprotein subunit alpha, mitochondrial	Etfa	0.816231	0.906374	0.893109
Q3V1L4;A0A494B9X3;E9Q9M1;A0A494BBK9;A0A494BAU4;A0A494BAN2;A0A494BBM7;G3X9J6;A0A494BBP6	Q3V1L4;A0A494B9X3;E9Q9M1;A0A494BBK9;A0A494BAU4;A0A494BAN2;A0A494BBM7;G3X9J6;A0A494BBP6	Cytosolic purine 5-nucleotidase	Nt5c2	0.820238	0.909354	1.04792
P62908;A0A140LI77;D3YV43	P62908;A0A140LI77;D3YV43	40S ribosomal protein S3	Rps3	0.821392	0.909354	1.02474
B2RXT3;E9Q7L0	B2RXT3;E9Q7L0		Ogdhl	0.825165	0.912156	1.01803
A0A075B6A0;A0A075B5P6;P01872	A0A075B6A0;A0A075B5P6;P01872	Ig mu chain C region	Ighm	0.828134	0.913222	0.924172
P11531;A0A668KLA2;A2A9Z1;A2A9Z2;A0A1Q1PRS4	P11531;A0A668KLA2	Dystrophin	Dmd	0.828618	0.913222	0.976917
Q9CQJ8	Q9CQJ8	NADH dehydrogenase [ubiquinone] 1 beta subcomplex subunit 9	Ndufb9	0.829934	0.913301	0.975986
Q05920;G5E8R3;E9QPD7;A0A494B951;A0A286YCC5;A0A494B912	Q05920;G5E8R3;E9QPD7	Pyruvate carboxylase, mitochondrial;Pyruvate carboxylase	Pc;Pcx	0.837532	0.917973	1.04919
P67984	P67984	60S ribosomal protein L22	Rpl22	0.837589	0.917973	1.13745
Q9CXW4;A2BH06	Q9CXW4;A2BH06	60S ribosomal protein L11	Rpl11	0.837931	0.917973	1.01908
O54724	O54724	Polymerase I and transcript release factor	Ptrf	0.840231	0.918118	0.985484
Q99LX0;A2A817;A2A816;A2A815;A2A813	Q99LX0;A2A817;A2A816;A2A815;A2A813	Protein deglycase DJ-1	Park7	0.840566	0.918118	0.974454
Q9CQ60;D3Z4X1;Q8CBG6;F6X8L5	Q9CQ60;D3Z4X1	6-phosphogluconolactonase	Pgls	0.842436	0.918794	0.953178
Q8JZN5;A0A0G2JDY4;A0A0G2JF25	Q8JZN5	Acyl-CoA dehydrogenase family member 9, mitochondrial	Acad9	0.844067	0.919206	1.01476
Q8JZQ2	Q8JZQ2	AFG3-like protein 2	Afg3l2	0.846161	0.920122	1.03203
Q8JZQ9	Q8JZQ9	Eukaryotic translation initiation factor 3 subunit B	Eif3b	0.850759	0.922204	0.973472
Q8BKC5;Q8BIV3	Q8BKC5	Importin-5	Ipo5	0.852916	0.922204	0.948492
E9Q1W0;Q6PHZ2;A0A0G2JGS4;E9Q1T1;E9Q1V9;P11798;Q5SVI1;A0A2I3BQP6;Q68EG2;Q5SVI2;Q5SVI0;Q5SVI3;F6RWZ9;E9PXV3;P28652;Q5SVI9;Q8CCM0;Q5SVJ1;Q5SVJ0;Q923T9;F8WIS9;A0A286YDL6;A0A286YCB8;F6WHR9	E9Q1W0;Q6PHZ2;A0A0G2JGS4;E9Q1T1;E9Q1V9;P11798;Q5SVI1;A0A2I3BQP6;Q68EG2;Q5SVI2;Q5SVI0;Q5SVI3;F6RWZ9;E9PXV3;P28652;Q5SVI9;Q8CCM0;Q5SVJ1;Q5SVJ0;Q923T9;F8WIS9	Calcium/calmodulin-dependent protein kinase type II subunit delta;Calcium/calmodulin-dependent protein kinase type II subunit alpha;Calcium/calmodulin-dependent protein kinase type II subunit beta;Calcium/calmodulin-dependent protein kinase type II subunit gamma	Camk2d;Camk2a;Camk2b;Camk2g	0.853051	0.922204	0.971278
P45376;D3YVJ7	P45376;D3YVJ7	Aldose reductase	Akr1b1;Akr1b3	0.853102	0.922204	1.01761
Q62425;A0A0N4SVQ1	Q62425;A0A0N4SVQ1	Cytochrome c oxidase subunit NDUFA4	Ndufa4	0.857228	0.925302	0.966001
Q9R0P3;H3BJP2;H3BLJ9;H3BJL6;H3BKH6;H3BJC6;H3BK43;H3BL99	Q9R0P3;H3BJP2;H3BLJ9;H3BJL6;H3BKH6;H3BJC6;H3BK43	S-formylglutathione hydrolase	Esd	0.861551	0.928603	0.979037
Q9D855;Q9CQB4	Q9D855;Q9CQB4	Cytochrome b-c1 complex subunit 7	Uqcrb	0.865279	0.930486	0.959724
Q9Z1E4;A0A1B0GT92;A0A1B0GR90	Q9Z1E4;A0A1B0GT92	Glycogen [starch] synthase, muscle	Gys1	0.865834	0.930486	0.979206
Q8BMS4	Q8BMS4	Ubiquinone biosynthesis O-methyltransferase, mitochondrial	Coq3	0.868436	0.931919	0.935262
Q9WUB3;E9PUM3;Q9ET01;Q3UEJ6	Q9WUB3;E9PUM3	Glycogen phosphorylase, muscle form;Alpha-1,4 glucan phosphorylase	Pygm	0.873313	0.935657	0.984576
Q9Z1J3;F7CZD1;F6TXD3	Q9Z1J3	Cysteine desulfurase, mitochondrial	Nfs1	0.87447	0.935657	1.02246
Q9CQ75	Q9CQ75	NADH dehydrogenase [ubiquinone] 1 alpha subcomplex subunit 2	Ndufa2	0.879366	0.939445	0.89386
Q02053;P31254	Q02053	Ubiquitin-like modifier-activating enzyme 1	Uba1	0.880569	0.939445	0.98997
Q04857	Q04857	Collagen alpha-1(VI) chain	Col6a1	0.885431	0.94145	1.04238
Q9CQZ6	Q9CQZ6	NADH dehydrogenase [ubiquinone] 1 beta subcomplex subunit 3	Ndufb3	0.885822	0.94145	0.975528
Q9D2G2	Q9D2G2	Dihydrolipoyllysine-residue succinyltransferase component of 2-oxoglutarate dehydrogenase complex, mitochondrial	Dlst	0.886738	0.94145	1.01499
Q9CZ44;A2AT02	Q9CZ44;A2AT02	NSFL1 cofactor p47	Nsfl1c	0.88758	0.94145	0.986285
Q791V5;A2AFW6;Q9D050	Q791V5;A2AFW6;Q9D050	Mitochondrial carrier homolog 2	Mtch2	0.889105	0.941707	0.986661
Q9D023;A0A0A6YY89;G5E869	Q9D023	Mitochondrial pyruvate carrier 2	Mpc2	0.895682	0.946438	1.01465
Q9WU78	Q9WU78	Programmed cell death 6-interacting protein	Pdcd6ip	0.896151	0.946438	1.03271
P05202	P05202	Aspartate aminotransferase, mitochondrial	Got2	0.898382	0.947432	1.0262
E9QLJ0;Q70KF4	E9QLJ0;Q70KF4	Cardiomyopathy-associated protein 5	Cmya5	0.90612	0.952624	0.951955
P68040	P68040	Guanine nucleotide-binding protein subunit beta-2-like 1;Guanine nucleotide-binding protein subunit beta-2-like 1, N-terminally processed	Gnb2l1	0.907183	0.952624	1.01216
P20029	P20029	78 kDa glucose-regulated protein	Hspa5	0.907199	0.952624	0.989431
P29699;A0A338P703;A0A338P7G1;A0A338P7H5	P29699;A0A338P703;A0A338P7G1;A0A338P7H5	Alpha-2-HS-glycoprotein	Ahsg	0.913871	0.955712	0.957985
P80317;A0A571BEL9;Q61390	P80317;A0A571BEL9;Q61390	T-complex protein 1 subunit zeta;T-complex protein 1 subunit zeta-2	Cct6a;Cct6b	0.915346	0.955712	0.984441
P63017;Q504P4;D3Z5E2;P16627	P63017;Q504P4	Heat shock cognate 71 kDa protein	Hspa8	0.916494	0.955712	0.991591
P17751;H7BXC3	P17751;H7BXC3	Triosephosphate isomerase	Tpi1	0.918142	0.955712	1.01121
P35979	P35979	60S ribosomal protein L12	Rpl12	0.918316	0.955712	1.01328
Q9WV98;A0A1Y7VL11;A0A1Y7VIZ6	Q9WV98	Mitochondrial import inner membrane translocase subunit Tim9	Timm9	0.921769	0.955712	0.984478
P00848	P00848	ATP synthase subunit a	Mtatp6	0.924173	0.955712	1.02314
Q8VCW8	Q8VCW8	Acyl-CoA synthetase family member 2, mitochondrial	Acsf2	0.924285	0.955712	0.985676
P59017	P59017	Bcl-2-like protein 13	Bcl2l13	0.924723	0.955712	1.04779
P35700;B1AXW5;B1AXW6;B1AXW4	P35700;B1AXW5;B1AXW6;B1AXW4	Peroxiredoxin-1	Prdx1	0.92475	0.955712	1.01402
Q8K3J1;A0A494BAW8	Q8K3J1;A0A494BAW8	NADH dehydrogenase [ubiquinone] iron-sulfur protein 8, mitochondrial	Ndufs8	0.924898	0.955712	1.13774
Q9CR68	Q9CR68	Cytochrome b-c1 complex subunit Rieske, mitochondrial;Cytochrome b-c1 complex subunit 11	Uqcrfs1	0.925906	0.955712	0.987753
Q9D7B6;D3YTT4;A0A0R4J0P1;A0A1L1SUG2	Q9D7B6;D3YTT4;A0A0R4J0P1	Isobutyryl-CoA dehydrogenase, mitochondrial	Acad8	0.927066	0.955712	1.02203
Q501J6;Q3U741;Q61656;S4R1I6;Q3TU25;Q8BTS0;B1ARB9	Q501J6;Q3U741;Q61656;S4R1I6;Q3TU25;Q8BTS0	Probable ATP-dependent RNA helicase DDX17;Probable ATP-dependent RNA helicase DDX5	Ddx17;Ddx5	0.930207	0.956471	1.01376
Q9QY76;Q8BH80	Q9QY76;Q8BH80	Vesicle-associated membrane protein-associated protein B	Vapb	0.930409	0.956471	0.991537
Q8BMF4	Q8BMF4	Dihydrolipoyllysine-residue acetyltransferase component of pyruvate dehydrogenase complex, mitochondrial	Dlat	0.933634	0.958444	0.977768
P30416;F7CAT1;F6S2D5	P30416;F7CAT1;F6S2D5	Peptidyl-prolyl cis-trans isomerase FKBP4;Peptidyl-prolyl cis-trans isomerase FKBP4, N-terminally processed;Peptidyl-prolyl cis-trans isomerase	Fkbp4	0.937669	0.961242	0.991259
P04247;A0A2R8W6F8;A0A2R8VK58	P04247;A0A2R8W6F8;A0A2R8VK58	Myoglobin	Mb	0.943465	0.964338	0.973062
O88685;A2AGN7;B7ZCF1;A0A087WPH7;F6Q2E3	O88685;A2AGN7;B7ZCF1;A0A087WPH7	26S protease regulatory subunit 6A	Psmc3	0.943484	0.964338	1.03378
Q9D1X0	Q9D1X0	Nucleolar protein 3	Nol3	0.945728	0.964338	1.03074
E9Q0S6;A0A087WRU0;A0A087WQ94;A0A087WQM0;A0A6I8MWZ2;A0A087WQS0;A0A1D5RM59;Q9DBT6;Q8CGB6;Q5SSZ5;A0A2R8VHQ0;A0A5F8MP98;A0A5F8MPF2	E9Q0S6;A0A087WRU0;A0A087WQ94;A0A087WQM0;A0A6I8MWZ2;A0A087WQS0;A0A1D5RM59;Q9DBT6		Tns1	0.94675	0.964338	1.00974
Q9D051	Q9D051	Pyruvate dehydrogenase E1 component subunit beta, mitochondrial	Pdhb	0.947259	0.964338	0.990369
Q91YT0;D3YUM1;D3Z1U9;D3Z0K1;D3YXX5;A0A494BAS8;D6RG60;A0A494BA02	Q91YT0;D3YUM1;D3Z1U9;D3Z0K1;D3YXX5;A0A494BAS8	NADH dehydrogenase [ubiquinone] flavoprotein 1, mitochondrial	Ndufv1	0.949926	0.965714	1.00936
Q9WUR9;A2ARF6;F6TEU8;A2ARF5	Q9WUR9;A2ARF6;F6TEU8	Adenylate kinase 4, mitochondrial	Ak4	0.957219	0.971783	0.99195
Q9DC61;A2AIW9	Q9DC61;A2AIW9	Mitochondrial-processing peptidase subunit alpha	Pmpca	0.960809	0.973603	0.99377
Q9WV35	Q9WV35	Probable C->U-editing enzyme APOBEC-2	Apobec2	0.961963	0.973603	0.962062
Q6P8J7;P30275	Q6P8J7	Creatine kinase S-type, mitochondrial	Ckmt2	0.962991	0.973603	0.987654
Q9JMH6	Q9JMH6	Thioredoxin reductase 1, cytoplasmic	Txnrd1	0.965383	0.974678	0.984038
P14152;A0A5F8MPN8;B1ATQ3	P14152;A0A5F8MPN8	Malate dehydrogenase, cytoplasmic	Mdh1	0.971877	0.979887	0.993423
Q91VR5;A0A1Y7VM48	Q91VR5	ATP-dependent RNA helicase DDX1	Ddx1	0.973261	0.979936	1.00411
P12382;A0A1W2P7T1	P12382	ATP-dependent 6-phosphofructokinase, liver type	Pfkl	0.975611	0.980957	0.996501
Q9CXT8	Q9CXT8	Mitochondrial-processing peptidase subunit beta	Pmpcb	0.987047	0.989539	0.997704
Q8BGH2	Q8BGH2	Sorting and assembly machinery component 50 homolog	Samm50	0.987827	0.989539	1.00221
Q9DCM0	Q9DCM0	Persulfide dioxygenase ETHE1, mitochondrial	Ethe1	0.988191	0.989539	0.990084
Q60931;J3QMG3	Q60931;J3QMG3	Voltage-dependent anion-selective channel protein 3	Vdac3	0.995761	0.995761	0.999396
